# Supplementary material for: The role of electric field, peripheral chains, and magnetic effects on significant 1H upfield shifts of the encapsulated molecules in chalcogen-bonded capsules
Source: Royal Society of Chemistry journal article supplement (doi:10.1039/d1cp02277f), 2021-01-01
Supplement: d1cp02277f1.pdf [file d1cp02277f1.pdf]

## Supporting Information

### **The role of electric field, peripheral chains, and magnetic effects on significant $^1\text{H}$ upfield shifts of the encapsulated molecules in chalcogen-bonded capsules.**

Demeter Tzeli,<sup>\*,[a,b]</sup> Ioannis D. Petsalakis,<sup>\*,[b]</sup> Giannoula Theodorakopoulos,<sup>[b]</sup> Faiz-Ur Rahman,<sup>[c,d]</sup> Yang Yu,<sup>d</sup> Julius Rebek, Jr.,<sup>[d,e]</sup>

<sup>[a]</sup>Laboratory of Physical Chemistry, Department of Chemistry, National and Kapodistrian University of Athens, Panepistimiopolis Zografou, Athens 157 71, Greece

<sup>[b]</sup>Theoretical and Physical Chemistry Institute, National Hellenic Research Foundation, 48 Vassileos Constantinou Ave., Athens 116 35, Greece

<sup>[c]</sup>Inner Mongolia Mongolia University Research Center for Glycochemistry of Characteristic Medicinal Resources, Department of Chemistry and Chemical Engineering, Inner Mongolia University, Hohhot China

<sup>[d]</sup> Center for Supramolecular Chemistry and Catalysis and Department of Chemistry, Shanghai University, 99 Shang-Da Road, Shanghai 200444, P. R. China

<sup>[e]</sup> Skaggs Institute for Chemical Biology and Department of Chemistry, The Scripps Research Institute, La Jolla, California 92037, United States

E-mails: [tzeli@chem.uoa.gr](mailto:tzeli@chem.uoa.gr), [idpet@eie.gr](mailto:idpet@eie.gr)

Tel: +30-210-727-4307, +30-210-727-3807

Fax: +30-210-727-3794

## Table of Contents

|                                                                                                                             |            |
|-----------------------------------------------------------------------------------------------------------------------------|------------|
| <b>Theoretical Section.....</b>                                                                                             | <b>S3</b>  |
| Analysis of the many-body interaction energy terms .....                                                                    | S3         |
| Dipole moment ( $\mu$ ), linear polarizability ( $\alpha$ ) and first-order hyperpolarizability ( $\beta$ ) .....           | S3         |
| Table 1S. Mulliken, CM5 and NBO charges .....                                                                               | S4         |
| Table 2S Dipole moments $\mu$ (Debye), dipole electric field isotropic and anisotropic electric field polarizabilities..... | S5         |
| Tables 3S-6S. $^1\text{H}$ NMR shifts .....                                                                                 | S6         |
| Table 7S. Binding Energies, $n$ -Body analysis.....                                                                         | S8         |
| Table 8S. HOMO-LUMO gaps.....                                                                                               | S9         |
| Table 9S. Geometries.....                                                                                                   | S10        |
| Figures 1S-3S. Calculated encapsulated complexes .....                                                                      | S40        |
| Figures 4S-5S. Magnetic isotropy and anisotropy of the encapsulated complexes .....                                         | S42        |
| Figures 6S-7S. Dipole moments .....                                                                                         | S43        |
| Figure 8S. Molecular Orbitals.....                                                                                          | S45        |
| Figures 9S-15S. $^1\text{H}$ NMR shifts.....                                                                                | S46        |
| Figures 16S-20S. Relative $^1\text{H}$ NMR shifts ( $\Delta\delta$ ).....                                                   | S49        |
| Figure 21S. Magnetic Isotropy of capsules .....                                                                             | S52        |
| Figure 22S. Magnetic Anisotropy of capsules .....                                                                           | S54        |
| Figure 23S. NICS contour plots of capsules .....                                                                            | S56        |
| <b>Experimental Section.....</b>                                                                                            | <b>S58</b> |
| Figure 24S. Cartoons of the encapsulation .....                                                                             | S58        |
| Figures 25S-51S. $^1\text{H}$ NMR spectra .....                                                                             | S59        |
| References.....                                                                                                             | S72        |

## Theoretical Section

### A. Analysis of the many-body interaction energy terms

The BSSE-corrected interaction energies ( $\Delta E$ ), deformation terms (D), the BSSE-corrected two- ( $\Delta^2 E$ ) and three-body ( $\Delta^3 E$ ) terms are:

$$\Delta E = E_{X_i X_j \dots}^{X_i X_j \dots}(X_i X_j \dots) - \sum_i E_{X_i X_j \dots}^{X_i X_j \dots}(X_i) + \sum_i D_{X_i}$$

$$D_{X_i} = E_{X_i X_j \dots}^{X_i}(X_i) - E_{X_i}^{X_i}(X_i)$$

$$\Delta^2 E_{X_1 X_2 \dots}^{X_1 X_2 \dots}(X_i X_j, BSSE) = E_{X_1 X_2 \dots}^{X_1 X_2 \dots}(X_i X_j) - \{E_{X_1 X_2 \dots}^{X_1 X_2 \dots}(X_i) + E_{X_1 X_2 \dots}^{X_1 X_2 \dots}(X_j)\}$$

$$\begin{aligned} \Delta^3 E_{X_1 X_2 \dots}^{X_1 X_2 \dots}(X_i X_j X_k, BSSE) &= E_{X_1 X_2 \dots}^{X_1 X_2 \dots}(X_i X_j X_k) - \{E_{X_1 X_2 \dots}^{X_1 X_2 \dots}(X_i) + E_{X_1 X_2 \dots}^{X_1 X_2 \dots}(X_j) + E_{X_1 X_2 \dots}^{X_1 X_2 \dots}(X_k)\} \\ &\quad - \{\Delta^2 E_{X_1 X_2 \dots}^{X_1 X_2 \dots}(X_i X_j) + \Delta^2 E_{X_1 X_2 \dots}^{X_1 X_2 \dots}(X_i X_k) + \Delta^2 E_{X_1 X_2 \dots}^{X_1 X_2 \dots}(X_j X_k)\} \end{aligned}$$

where,  $E_G^s(M)$  refers to the total energy of the molecule  $M$  computed at the geometry  $G$  with basis set  $s$ .

### B. Dipole moment ( $\mu$ ), linear polarizability ( $\alpha$ ) and first-order hyperpolarizability ( $\beta$ )

- The total dipole moment is calculated using the following equation:

$$\mu_{tot} = (\mu_x^2 + \mu_y^2 + \mu_z^2)^{\frac{1}{2}}$$

- Linear polarizability ( $\alpha$ ) is calculated using the following equation:

$$\alpha_{tot} = \frac{1}{3}(\alpha_{xx} + \alpha_{yy} + \alpha_{zz})$$

$$\Delta \alpha = \frac{1}{\sqrt{2}} \left[ (\alpha_{xx} - \alpha_{yy})^2 + (\alpha_{yy} - \alpha_{zz})^2 + (\alpha_{zz} - \alpha_{xx})^2 + 6\alpha_{xz}^2 + 6\alpha_{xy}^2 + 6\alpha_{yz}^2 \right]^{\frac{1}{2}}$$

where:  $\alpha_{xx}$ ,  $\alpha_{xy}$ ,  $\alpha_{yy}$ ,  $\alpha_{xz}$ ,  $\alpha_{yz}$ ,  $\alpha_{zz}$ , polarizability tensors

- First-order hyperpolarizability ( $\beta$ ) is calculated using the following equation:

$$\langle \beta \rangle = \left[ (\beta_{xxx} + \beta_{xyy} + \beta_{xzz})^2 + (\beta_{yyy} + \beta_{yzz} + \beta_{yxx})^2 + (\beta_{zzz} + \beta_{zxx} + \beta_{zyy})^2 \right]^{\frac{1}{2}}$$

where:  $\beta_{xxx}$ ,  $\beta_{cxy}$ ,  $\beta_{xyy}$ ,  $\beta_{yyy}$ ,  $\beta_{xxz}$ ,  $\beta_{xyz}$ ,  $\beta_{yyz}$ ,  $\beta_{xzz}$ ,  $\beta_{yzz}$ ,  $\beta_{zzz}$  hyperpolarizability tensors

**Table 1S** Charges via the Mulliken, CM5 and NBO analyses  $q_x$  on the halogen (Br or I),  $q_Y$  on the chalcogen (Se and Te) of  $A_x+A_x'$  and  $RX+RX'@A_x+A_x'$  at M06-2X/6-31G(d,p) level of theory.

|                                                                  | Mulliken |       | CM5   |       | NBO   |       | Mulliken |      | CM5  |      | NBO  |      |
|------------------------------------------------------------------|----------|-------|-------|-------|-------|-------|----------|------|------|------|------|------|
|                                                                  | X        | X'    | X     | X'    | X     | X'    | Y        | Y'   | Y    | Y'   | Y    | Y'   |
| $A_{Se}+A_{Se}$                                                  |          |       |       |       |       |       | 0.57     | 0.57 | 0.43 | 0.43 | 0.97 | 0.97 |
| <b>RBr+RBr@A<sub>Se</sub>+A<sub>Se</sub></b>                     | -0.16    | -0.16 | -0.07 | -0.07 | -0.08 | -0.08 | 0.58     | 0.58 | 0.44 | 0.44 | 0.99 | 0.99 |
| <b>RBr+RI@A<sub>Se</sub>+A<sub>Se</sub></b>                      | -0.16    | -0.19 | -0.08 | -0.01 | -0.07 | 0.06  | 0.55     | 0.55 | 0.44 | 0.44 | 0.99 | 0.99 |
| <b>RI+RI@A<sub>Se</sub>+A<sub>Se</sub></b>                       | -0.18    | -0.18 | -0.01 | -0.01 | 0.07  | 0.07  | 0.55     | 0.55 | 0.44 | 0.44 | 0.99 | 0.99 |
| <b>C<sub>9</sub>H<sub>20</sub>@A<sub>Se</sub>+A<sub>Se</sub></b> |          |       |       |       |       |       | 0.58     | 0.58 | 0.44 | 0.44 | 0.98 | 0.98 |
| $A_{Se}+A_{Te}$                                                  |          |       |       |       |       |       | 0.62     | 0.80 | 0.47 | 0.48 | 1.04 | 1.24 |
| <b>RBr+RBr@A<sub>Se</sub>+A<sub>Te</sub></b>                     | -0.16    | -0.18 | -0.07 | -0.08 | -0.06 | -0.08 | 0.62     | 0.80 | 0.48 | 0.50 | 1.05 | 1.26 |
| <b>RI+RBr@A<sub>Se</sub>+A<sub>Te</sub></b>                      | -0.16    | -0.15 | 0.00  | -0.09 | 0.08  | -0.08 | 0.62     | 0.80 | 0.47 | 0.49 | 1.05 | 1.26 |
| <b>RBr+RI@A<sub>Se</sub>+A<sub>Te</sub></b>                      | -0.14    | -0.19 | -0.06 | -0.02 | -0.06 | 0.05  | 0.62     | 0.80 | 0.47 | 0.50 | 1.05 | 1.26 |
| <b>RI+RI@A<sub>Se</sub>+A<sub>Te</sub></b>                       | -0.17    | -0.19 | -0.02 | -0.01 | 0.06  | 0.05  | 0.62     | 0.81 | 0.47 | 0.50 | 1.04 | 1.26 |
| <b>C<sub>9</sub>H<sub>20</sub>@A<sub>Se</sub>+A<sub>Te</sub></b> |          |       |       |       |       |       | 0.62     | 0.80 | 0.47 | 0.50 | 1.04 | 1.25 |
| $A_{Te}+A_{Te}$                                                  |          |       |       |       |       |       | 0.89     | 0.89 | 0.51 | 0.51 | 1.31 | 1.31 |
| <b>RBr+RBr@A<sub>Te</sub>+A<sub>Te</sub></b>                     | -0.14    | -0.14 | -0.07 | -0.07 | -0.07 | -0.07 | 0.89     | 0.89 | 0.53 | 0.53 | 1.33 | 1.33 |
| <b>RBr+RI@A<sub>Te</sub>+A<sub>Te</sub></b>                      | -0.14    | -0.19 | -0.07 | 0.00  | -0.08 | 0.05  | 0.90     | 0.90 | 0.52 | 0.52 | 1.33 | 1.33 |
| <b>RI+RI@A<sub>Te</sub>+A<sub>Te</sub></b>                       | -0.17    | -0.17 | -0.01 | -0.01 | 0.05  | 0.05  | 0.90     | 0.90 | 0.52 | 0.52 | 1.32 | 1.32 |
| <b>C<sub>9</sub>H<sub>20</sub>@A<sub>Te</sub>+A<sub>Te</sub></b> |          |       |       |       |       |       | 0.89     | 0.89 | 0.53 | 0.53 | 1.32 | 1.32 |
| <b>RBr (C<sub>4</sub>H<sub>9</sub>Br)</b>                        | -0.16    |       | -0.10 |       | -0.03 |       |          |      |      |      |      |      |
| <b>RI (C<sub>4</sub>H<sub>9</sub>I)</b>                          | -0.06    |       | -0.08 |       | 0.08  |       |          |      |      |      |      |      |
| <b>C<sub>9</sub>H<sub>20</sub></b>                               |          |       |       |       |       |       |          |      |      |      |      |      |

**Table 2S** Dipole moments  $\mu$ (Debye), dipole electric field isotropic and anisotropic electric field polarizabilities (au) of  $\mathbf{A}_x+\mathbf{A}_{x'}$ ,  $\mathbf{RX}+\mathbf{RX}'@A_x+A_{x'}$ ,  $\mathbf{A}'_x+\mathbf{A}'_{x'}$ , and  $\mathbf{RX}+\mathbf{RX}'@A'_x+A'_{x'}$  at M06-2X/6-31G(d,p) level of theory.

|                                                                                     | $\mu$  | $\mathbf{A}_x+\mathbf{A}_{x'}$ |         |             | $\mathbf{A}'_x+\mathbf{A}'_{x'}$ |         |             | % (A-A') |       |
|-------------------------------------------------------------------------------------|--------|--------------------------------|---------|-------------|----------------------------------|---------|-------------|----------|-------|
|                                                                                     |        | iso                            | aniso   | % iso-aniso | iso                              | aniso   | % iso-aniso | iso      | aniso |
| $\mathbf{A}_{Se}+\mathbf{A}_{Se}$                                                   | 0.0015 | 1521.34                        | 1008.03 | 33.7        | 1816.44                          | 1242.05 | 57.0        | 16.2     | 18.8  |
| <b><math>\mathbf{RBr}+\mathbf{RBr}@A_{Se}+\mathbf{A}_{Se}</math></b>                | 1.4506 | 1590.86                        | 1023.25 | 35.7        | 1881.93                          | 1262.12 | 60.6        | 15.5     | 18.9  |
| <b><math>\mathbf{RBr}+\mathbf{RI}@A_{Se}+\mathbf{A}_{Se}</math></b>                 | 1.3307 | 1588.64                        | 1029.83 | 35.2        | 1871.08                          | 1275.48 | 57.8        | 15.1     | 19.3  |
| <b><math>\mathbf{RI}+\mathbf{RI}@A_{Se}+\mathbf{A}_{Se}</math></b>                  | 1.1175 | 1597.64                        | 1027.44 | 35.7        | 1895.49                          | 1241.17 | 63.7        | 15.7     | 17.2  |
| <b><math>\mathbf{C}_9\mathbf{H}_{20}@A_{Se}+\mathbf{A}_{Se}</math></b>              | 0.2671 | 1576.74                        | 1029.73 | 34.7        | 1886.02                          | 1286.84 | 58.2        | 16.4     | 20.0  |
| $\mathbf{A}_{Se}+\mathbf{A}_{Te}$                                                   | 8.0431 | 1585.30                        | 1071.63 | 32.4        | 1870.11                          | 1333.24 | 50.1        | 15.2     | 19.6  |
| <b><math>\mathbf{RBr}+\mathbf{RBr}@A_{Se}+\mathbf{A}_{Te}</math></b>                | 7.8370 | 1655.81                        | 1083.37 | 34.6        | 1954.84                          | 1313.41 | 59.2        | 15.3     | 17.5  |
| <b><math>\mathbf{RI}+\mathbf{RBr}@A_{Se}+\mathbf{A}_{Te}</math></b>                 | 7.7264 | 1665.75                        | 1085.47 | 34.8        | 1963.57                          | 1320.26 | 59.3        | 15.2     | 17.8  |
| <b><math>\mathbf{RBr}+\mathbf{RI}@A_{Se}+\mathbf{A}_{Te}</math></b>                 | 8.1691 | 1666.64                        | 1084.94 | 34.9        | 1966.97                          | 1310.94 | 60.5        | 15.3     | 17.2  |
| <b><math>\mathbf{RI}+\mathbf{RI}@A_{Se}+\mathbf{A}_{Te}</math></b>                  | 7.5407 | 1681.06                        | 1102.56 | 34.4        | 1973.74                          | 1332.58 | 58.2        | 14.8     | 17.3  |
| <b><math>\mathbf{C}_9\mathbf{H}_{20}@A_{Se}+\mathbf{A}_{Te}</math></b>              | 7.8024 | 1641.21                        | 1086.36 | 33.8        | 1932.94                          | 1354.50 | 53.2        | 15.1     | 19.8  |
| $\mathbf{A}_{Te}+\mathbf{A}_{Te}$                                                   | 0.0059 | 1669.60                        | 1121.13 | 32.9        | 1980.1                           | 1358.75 | 55.4        | 15.7     | 17.5  |
| <b><math>\mathbf{RBr}+\mathbf{RBr}@A_{Te}+\mathbf{A}_{Te}</math></b>                | 0.5578 | 1735.83                        | 1138.6  | 34.4        | 2039.62                          | 1379.18 | 58.0        | 14.9     | 17.4  |
| <b><math>\mathbf{RBr}+\mathbf{RI}@A_{Te}+\mathbf{A}_{Te}</math></b>                 | 0.5204 | 1748.09                        | 1165.26 | 33.3        | 2049.52                          | 1409.12 | 55.0        | 14.7     | 17.3  |
| <b><math>\mathbf{RI}+\mathbf{RI}@A_{Te}+\mathbf{A}_{Te}</math></b>                  | 0.3940 | 1758.40                        | 1166.58 | 33.7        | 2060.07                          | 1396.57 | 56.9        | 14.6     | 16.5  |
| <b><math>\mathbf{C}_9\mathbf{H}_{20}@A_{Te}+\mathbf{A}_{Te}</math></b>              | 0.1600 | 1719.59                        | 1135.14 | 34.0        | 2041.26                          | 1401.95 | 56.3        | 15.8     | 19.0  |
| <b><math>\mathbf{RBr}</math> (<math>\mathbf{C}_4\mathbf{H}_9\mathbf{Br}</math>)</b> | 2.3601 | 60.6347                        | 27.7507 |             |                                  |         |             |          |       |
| <b><math>\mathbf{RI}</math> (<math>\mathbf{C}_4\mathbf{H}_9\mathbf{I}</math>)</b>   | 2.3272 | 67.0546                        | 45.0807 |             |                                  |         |             |          |       |
| <b><math>\mathbf{C}_9\mathbf{H}_{20}</math></b>                                     | 0.0476 | 100.966                        | 37.8254 |             |                                  |         |             |          |       |

**Table 3S.**  $^1\text{H}$  NMR shifts of 1- $\text{C}_4\text{H}_9\text{Br}$  and 1- $\text{C}_4\text{H}_9\text{I}$  inside capsules  $\text{A}_Y+\text{A}_{Y'}$ ,  $Y, Y'=\text{Se}$  and  $\text{Te}$ .

| $^1\text{H}$ NMR shifts of 1- $\text{C}_4\text{H}_9\text{Br}$ |                                             |          |       |           |        |       |       |                                             |          |       |
|---------------------------------------------------------------|---------------------------------------------|----------|-------|-----------|--------|-------|-------|---------------------------------------------|----------|-------|
| RBr                                                           | $\text{A}_{\text{Se}+\text{A}_{\text{Se}}}$ |          |       |           |        |       |       | $\text{A}_{\text{Te}+\text{A}_{\text{Te}}}$ |          |       |
|                                                               | RBr + RBr                                   | RBr + RI |       | RBr + RBr | RBr+RI |       |       | RBr + RBr                                   | RBr + RI |       |
| 3.20                                                          | -0.81                                       | -0.92    | -0.74 | -0.98     | -0.16  | -0.99 | 0.21  | -0.44                                       | -0.37    | 0.54  |
| 3.20                                                          | -0.44                                       | -0.38    | -0.42 | -0.13     | -0.08  | -0.09 | -0.23 | 0.51                                        | 0.50     | 0.38  |
| 1.73                                                          | -2.35                                       | -2.36    | -2.25 | -2.42     | -1.94  | -2.42 | -1.93 | -2.06                                       | -2.02    | -1.89 |
| 1.73                                                          | -2.23                                       | -2.25    | -2.04 | -2.18     | -1.88  | -2.00 | -2.03 | -1.73                                       | -1.81    | -1.52 |
| 1.22                                                          | -2.48                                       | -2.87    | -2.94 | -2.50     | -2.65  | -3.02 | -2.78 | -2.34                                       | -2.74    | -2.55 |
| 1.22                                                          | -2.87                                       | -2.47    | -2.50 | -2.90     | -2.31  | -2.63 | -2.39 | -2.78                                       | -2.32    | -2.69 |
| 1.12                                                          | -3.67                                       | -3.10    | -2.83 | -3.78     | -2.80  | -2.80 | -2.64 | -3.65                                       | -2.86    | -3.35 |
| 0.91                                                          | -3.96                                       | -3.66    | -3.62 | -4.01     | -3.49  | -3.72 | -3.60 | -4.06                                       | -3.70    | -3.67 |
| 0.91                                                          | -3.07                                       | -3.91    | -4.05 | -3.16     | -3.90  | -4.05 | -3.93 | -2.74                                       | -3.96    | -2.57 |

  

| $^1\text{H}$ NMR shifts of 1- $\text{C}_4\text{H}_9\text{I}$ |                                             |          |       |                                             |        |       |       |                                             |          |       |
|--------------------------------------------------------------|---------------------------------------------|----------|-------|---------------------------------------------|--------|-------|-------|---------------------------------------------|----------|-------|
| RI                                                           | $\text{A}_{\text{Se}+\text{A}_{\text{Se}}}$ |          |       | $\text{A}_{\text{Se}+\text{A}_{\text{Te}}}$ |        |       |       | $\text{A}_{\text{Te}+\text{A}_{\text{Te}}}$ |          |       |
|                                                              | RI + RI                                     | RBr + RI |       | RI + RI                                     | RBr+RI |       |       | RI + RI                                     | RBr + RI |       |
| 2.72                                                         | -1.35                                       | -1.59    | -1.69 | -0.82                                       | -0.83  | -1.31 | -1.22 | -0.21                                       | -0.38    | -0.42 |
| 2.72                                                         | -1.07                                       | -0.89    | -0.98 | -0.74                                       | -0.17  | -0.55 | -1.02 | -0.43                                       | 0.11     | -0.19 |
| 1.67                                                         | -2.29                                       | -2.31    | -2.34 | -2.05                                       | -1.90  | -1.95 | -2.32 | -1.84                                       | -1.77    | -1.68 |
| 1.67                                                         | -2.21                                       | -2.14    | -2.31 | -2.23                                       | -1.81  | -1.99 | -2.25 | -1.32                                       | -1.62    | -1.83 |
| 1.23                                                         | -2.40                                       | -2.86    | -2.44 | -2.98                                       | -2.38  | -2.44 | -2.57 | -2.47                                       | -2.54    | -2.66 |
| 1.23                                                         | -2.87                                       | -2.44    | -2.86 | -2.73                                       | -2.51  | -2.51 | -3.07 | -2.59                                       | -2.53    | -2.60 |
| 0.89                                                         | -3.75                                       | -2.76    | -3.79 | -4.02                                       | -2.54  | -3.50 | -3.85 | -3.63                                       | -2.68    | -2.34 |
| 0.89                                                         | -4.05                                       | -3.71    | -4.05 | -3.68                                       | -3.32  | -3.77 | -4.26 | -3.61                                       | -3.31    | -3.74 |
| 1.10                                                         | -2.91                                       | -4.09    | -3.04 | -2.66                                       | -3.74  | -2.71 | -2.87 | -2.45                                       | -4.16    | -4.15 |

**Table 4S.**  $^1\text{H}$  NMR shifts of 1- $\text{C}_4\text{H}_9\text{Br}$  and 1- $\text{C}_4\text{H}_9\text{I}$  inside capsules  $\text{A}'_Y+\text{A}'_{Y'}$ ,  $Y, Y'=\text{Se}$  and  $\text{Te}$ .

| $^1\text{H}$ NMR shifts of 1- $\text{C}_4\text{H}_9\text{Br}$ |                                               |          |       |                                               |          |       |       |                                               |          |       |
|---------------------------------------------------------------|-----------------------------------------------|----------|-------|-----------------------------------------------|----------|-------|-------|-----------------------------------------------|----------|-------|
| RBr                                                           | $\text{A}'_{\text{Se}+\text{A}'_{\text{Se}}}$ |          |       | $\text{A}'_{\text{Se}+\text{A}'_{\text{Te}}}$ |          |       |       | $\text{A}'_{\text{Te}+\text{A}'_{\text{Te}}}$ |          |       |
|                                                               | RBr + RBr                                     | RBr + RI |       | RBr + RBr                                     | RBr + RI |       |       | RBr + RBr                                     | RBr + RI |       |
| 3.20                                                          | -0.90                                         | -0.99    | -0.83 | -1.06                                         | -0.25    | -1.08 | 0.12  | -0.51                                         | -0.43    | 0.44  |
| 3.20                                                          | -0.51                                         | -0.45    | -0.52 | -0.22                                         | -0.16    | -0.17 | -0.32 | 0.45                                          | 0.44     | 0.28  |
| 1.73                                                          | -2.44                                         | -2.45    | -2.36 | -2.51                                         | -2.06    | -2.53 | -2.03 | -2.14                                         | -2.09    | -1.99 |
| 1.73                                                          | -2.30                                         | -2.33    | -2.16 | -2.28                                         | -1.96    | -2.09 | -2.12 | -1.80                                         | -1.87    | -1.63 |
| 1.22                                                          | -2.56                                         | -2.95    | -3.04 | -2.59                                         | -2.79    | -3.15 | -2.90 | -2.42                                         | -2.83    | -2.65 |
| 1.22                                                          | -2.98                                         | -2.55    | -2.60 | -3.01                                         | -2.39    | -2.73 | -2.49 | -2.88                                         | -2.39    | -2.78 |
| 0.91                                                          | -3.76                                         | -3.76    | -3.74 | -3.89                                         | -3.49    | -3.82 | -3.71 | -3.73                                         | -3.78    | -3.51 |
| 0.91                                                          | -4.08                                         | -4.03    | -4.16 | -4.15                                         | -4.09    | -4.18 | -4.08 | -4.16                                         | -4.07    | -3.80 |
| 1.12                                                          | -3.23                                         | -3.20    | -2.95 | -3.33                                         | -2.91    | -2.98 | -2.83 | -2.88                                         | -2.99    | -2.75 |

  

| $^1\text{H}$ NMR shifts of 1- $\text{C}_4\text{H}_9\text{I}$ |                                               |          |       |                                               |          |       |       |                                               |          |       |
|--------------------------------------------------------------|-----------------------------------------------|----------|-------|-----------------------------------------------|----------|-------|-------|-----------------------------------------------|----------|-------|
| RI                                                           | $\text{A}'_{\text{Se}+\text{A}'_{\text{Se}}}$ |          |       | $\text{A}'_{\text{Se}+\text{A}'_{\text{Te}}}$ |          |       |       | $\text{A}'_{\text{Te}+\text{A}'_{\text{Te}}}$ |          |       |
|                                                              | RI + RI                                       | RBr + RI |       | RI + RI                                       | RBr + RI |       |       | RI + RI                                       | RBr + RI |       |
| 2.72                                                         | -1.42                                         | -1.66    | -1.78 | -0.91                                         | -0.93    | -1.37 | -1.32 | -0.33                                         | -0.48    | -0.52 |
| 2.72                                                         | -1.14                                         | -0.95    | -1.08 | -0.83                                         | -0.31    | -0.61 | -1.11 | -0.53                                         | 0.02     | -0.29 |
| 1.67                                                         | -2.38                                         | -2.39    | -2.43 | -2.17                                         | -2.03    | -2.01 | -2.42 | -1.99                                         | -1.87    | -1.75 |
| 1.67                                                         | -2.29                                         | -2.22    | -2.41 | -2.35                                         | -1.97    | -2.05 | -2.35 | -1.45                                         | -1.71    | -1.92 |
| 1.23                                                         | -2.48                                         | -2.95    | -2.54 | -3.12                                         | -2.53    | -2.53 | -2.68 | -2.61                                         | -2.66    | -2.76 |
| 1.23                                                         | -2.97                                         | -2.53    | -2.95 | -2.88                                         | -2.68    | -2.61 | -3.20 | -2.73                                         | -2.65    | -2.73 |
| 0.89                                                         | -3.85                                         | -3.82    | -3.85 | -4.19                                         | -3.54    | -3.59 | -3.97 | -3.80                                         | -3.46    | -3.85 |
| 0.89                                                         | -4.17                                         | -4.21    | -4.09 | -3.85                                         | -3.95    | -3.86 | -4.40 | -3.81                                         | -4.29    | -4.25 |
| 1.10                                                         | -3.06                                         | -2.92    | -3.17 | -2.87                                         | -2.78    | -2.85 | -3.06 | -2.68                                         | -2.87    | -2.53 |

**Table 5S.**  $^1\text{H}$  NMR shifts of  $\text{C}_9\text{H}_{20}$  inside capsules, in solvent and experimental values.

| $\text{A}_{\text{Se}}+\text{A}_{\text{Se}}$ | $\text{A}_{\text{Se}}+\text{A}_{\text{Te}}$ | $\text{A}_{\text{Te}}+\text{A}_{\text{Te}}$ | $\text{A}'_{\text{Se}}+\text{A}'_{\text{Se}}$ | $\text{A}'_{\text{Se}}+\text{A}'_{\text{Te}}$ | $\text{A}'_{\text{Te}}+\text{A}'_{\text{Te}}$ | free | expt |
|---------------------------------------------|---------------------------------------------|---------------------------------------------|-----------------------------------------------|-----------------------------------------------|-----------------------------------------------|------|------|
| -3.86                                       | -3.23                                       | -3.34                                       | -5.01                                         | -3.37                                         | -4.3                                          | 1.14 | 0.88 |
| -3.25                                       | -3.54                                       | -3.69                                       | -4.31                                         | -3.66                                         | -4.53                                         | 0.94 | 0.88 |
| -3.60                                       | -3.73                                       | -3.54                                       | -4.54                                         | -3.89                                         | -4.59                                         | 0.94 | 0.88 |
| -1.74                                       | -2.52                                       | -2.09                                       | -2.75                                         | -2.60                                         | -3.39                                         | 1.38 | 1.31 |
| -2.89                                       | -2.66                                       | -2.39                                       | -3.75                                         | -2.77                                         | -3.51                                         | 1.38 | 1.31 |
| -3.05                                       | -2.93                                       | -2.33                                       | -3.7                                          | -3.05                                         | -3.34                                         | 1.34 | 1.29 |
| -3.04                                       | -2.80                                       | -1.90                                       | -3.84                                         | -2.90                                         | -3.29                                         | 1.34 | 1.29 |
| -3.54                                       | -2.58                                       | -2.24                                       | -3.86                                         | -2.66                                         | -3.17                                         | 1.36 | 1.29 |
| -2.32                                       | -3.53                                       | -2.23                                       | -2.91                                         | -3.60                                         | -2.93                                         | 1.36 | 1.29 |
| -3.11                                       | -2.65                                       | -1.78                                       | -3.57                                         | -2.76                                         | -2.8                                          | 1.37 | 1.29 |
| -2.81                                       | -2.56                                       | -1.56                                       | -3.27                                         | -2.66                                         | -2.7                                          | 1.37 | 1.29 |
| -3.68                                       | -2.06                                       | -2.24                                       | -4.16                                         | -2.13                                         | -3.02                                         | 1.36 | 1.29 |
| -2.75                                       | -2.91                                       | -1.72                                       | -3.4                                          | -3.01                                         | -2.99                                         | 1.36 | 1.29 |
| -2.97                                       | -2.59                                       | -2.50                                       | -3.67                                         | -2.69                                         | -3.34                                         | 1.34 | 1.29 |
| -3.05                                       | -2.65                                       | -2.16                                       | -3.79                                         | -2.76                                         | -3.36                                         | 1.34 | 1.29 |
| -2.34                                       | -1.41                                       | -1.80                                       | -3.51                                         | -1.52                                         | -3.42                                         | 1.39 | 1.31 |
| -2.50                                       | -2.49                                       | -2.13                                       | -3.51                                         | -2.61                                         | -3.44                                         | 1.39 | 1.31 |
| -3.26                                       | -3.38                                       | -3.42                                       | -4.63                                         | -3.88                                         | -4.44                                         | 0.94 | 0.88 |
| -3.65                                       | -3.01                                       | -3.13                                       | -4.62                                         | -3.53                                         | -4.52                                         | 0.94 | 0.88 |
| -3.36                                       | -3.71                                       | -3.49                                       | -4.31                                         | -3.17                                         | -4.29                                         | 1.14 | 0.88 |

**Table 6S.** Average of  $^1\text{H}$  NMR shifts of  $\text{C}_9\text{H}_{20}$  for each C atom inside capsules, in solvent and experimental values.

| $\text{A}_{\text{Se}}+\text{A}_{\text{Se}}$ | $\text{A}_{\text{Se}}+\text{A}_{\text{Te}}$ | $\text{A}_{\text{Te}}+\text{A}_{\text{Te}}$ | $\text{A}'_{\text{Se}}+\text{A}'_{\text{Se}}$ | $\text{A}'_{\text{Se}}+\text{A}'_{\text{Te}}$ | $\text{A}'_{\text{Te}}+\text{A}'_{\text{Te}}$ | free | expt |
|---------------------------------------------|---------------------------------------------|---------------------------------------------|-----------------------------------------------|-----------------------------------------------|-----------------------------------------------|------|------|
| -3.57                                       | -3.50                                       | -3.52                                       | -4.62                                         | -3.64                                         | -4.47                                         | 1.01 | 0.88 |
| -2.31                                       | -2.59                                       | -2.24                                       | -3.25                                         | -2.69                                         | -3.45                                         | 1.38 | 1.31 |
| -3.04                                       | -2.87                                       | -2.12                                       | -3.77                                         | -2.97                                         | -3.32                                         | 1.34 | 1.29 |
| -2.93                                       | -3.06                                       | -2.23                                       | -3.39                                         | -3.13                                         | -3.05                                         | 1.36 | 1.29 |
| -2.96                                       | -2.61                                       | -1.67                                       | -3.42                                         | -2.71                                         | -2.75                                         | 1.37 | 1.29 |
| -3.22                                       | -2.49                                       | -1.98                                       | -3.78                                         | -2.57                                         | -3.01                                         | 1.36 | 1.29 |
| -3.01                                       | -2.62                                       | -2.33                                       | -3.73                                         | -2.73                                         | -3.35                                         | 1.34 | 1.29 |
| -2.42                                       | -1.95                                       | -1.97                                       | -3.51                                         | -2.06                                         | -3.43                                         | 1.39 | 1.31 |
| -3.42                                       | -3.37                                       | -3.35                                       | -4.52                                         | -3.53                                         | -4.42                                         | 1.01 | 0.88 |

**Table 7S.** BSSE corrected  $\Delta E$  (eV), deformation energy(Def), 2-body(2B), 3-body(3B) terms in eV at M06-2X/6-31G(d,p).

|                                                                  | $\Delta E_u^a$                                                                                                                       | $\Delta E_{bsse}$ | Def. <sup>b</sup> | 2B <sub>1</sub> <sup>c</sup> | 2B <sub>2</sub> <sup>d</sup> | 2B <sub>3</sub> <sup>e</sup> | 3B    | def1 <sup>f</sup> | def2 <sup>g</sup> | def3 <sup>h</sup> | def4 <sup>i</sup> |
|------------------------------------------------------------------|--------------------------------------------------------------------------------------------------------------------------------------|-------------------|-------------------|------------------------------|------------------------------|------------------------------|-------|-------------------|-------------------|-------------------|-------------------|
| <b>2C<sub>4</sub>H<sub>9</sub>Br</b>                             | -0.32                                                                                                                                | -0.23             | 0.01              | -0.24                        |                              |                              |       |                   |                   |                   |                   |
| <b>C<sub>4</sub>H<sub>9</sub>Br+C<sub>4</sub>H<sub>9</sub>I</b>  | -0.29                                                                                                                                | -0.22             | 0.01              | -0.23                        |                              |                              |       |                   |                   |                   |                   |
| <b>2C<sub>4</sub>H<sub>9</sub>I</b>                              | -0.25                                                                                                                                | -0.22             | 0.01              | -0.23                        |                              |                              |       |                   |                   |                   |                   |
| <b>A<sub>Se</sub>+A<sub>Se</sub></b>                             | -3.95                                                                                                                                | -1.80             | 0.72              | -2.51                        |                              |                              |       |                   |                   |                   |                   |
| <b>A<sub>Se</sub>+A<sub>Te</sub></b>                             | -3.91                                                                                                                                | -2.77             | 1.17              | -3.94                        |                              |                              |       |                   |                   |                   |                   |
| <b>A<sub>Te</sub>+A<sub>Te</sub></b>                             | -5.88                                                                                                                                | -4.60             | 2.23              | -6.84                        |                              |                              |       |                   |                   |                   |                   |
| <b>A'<sub>Te</sub>+A'<sub>Te</sub></b>                           | -5.72                                                                                                                                | -4.58             | 2.24              | -6.82                        |                              |                              |       |                   |                   |                   |                   |
|                                                                  | <b>RX+RX' &amp; A<sub>Y</sub>+A<sub>Y'</sub> OR C<sub>9</sub>H<sub>20</sub> &amp; A<sub>Y</sub>+A<sub>Y'</sub></b>                   |                   |                   |                              |                              |                              |       |                   |                   |                   |                   |
| <b>RBr+RBr@A<sub>Se</sub>+A<sub>Se</sub></b>                     | -2.81                                                                                                                                | -0.87             | 0.33              | -1.19                        |                              |                              |       | 0.00              | 0.33              |                   |                   |
| <b>RBr+RI@A<sub>Se</sub>+A<sub>Se</sub></b>                      | -1.67                                                                                                                                | -0.97             | 0.26              | -1.23                        |                              |                              |       | 0.01              | 0.25              |                   |                   |
| <b>RI+RI@A<sub>Se</sub>+A<sub>Se</sub></b>                       | -1.74                                                                                                                                | -1.05             | 0.23              | -1.28                        |                              |                              |       | 0.01              | 0.22              |                   |                   |
| <b>C<sub>9</sub>H<sub>20</sub>@A<sub>Se</sub>+A<sub>Se</sub></b> | -2.00                                                                                                                                | -0.94             | 0.01              | -0.95                        |                              |                              |       | 0.00              | 0.01              |                   |                   |
| <b>RBr+RBr@A<sub>Se</sub>+A<sub>Te</sub></b>                     | -1.65                                                                                                                                | -0.98             | 0.29              | -1.27                        |                              |                              |       | 0.01              | 0.29              |                   |                   |
| <b>RBr+RI@A<sub>Se</sub>+A<sub>Te</sub></b>                      | -1.67                                                                                                                                | -0.98             | 0.32              | -1.30                        |                              |                              |       | 0.03              | 0.26              |                   |                   |
| <b>RI+RBr@A<sub>Se</sub>+A<sub>Te</sub></b>                      | -1.66                                                                                                                                | -1.00             | 0.37              | -1.37                        |                              |                              |       | 0.01              | 0.31              |                   |                   |
| <b>RI+RI@A<sub>Se</sub>+A<sub>Te</sub></b>                       | -1.61                                                                                                                                | -0.93             | 0.38              | -1.31                        |                              |                              |       | 0.16              | 0.21              |                   |                   |
| <b>C<sub>9</sub>H<sub>20</sub>@A<sub>Se</sub>+A<sub>Te</sub></b> | -1.27                                                                                                                                | -0.83             | 0.14              | -0.97                        |                              |                              |       | 0.03              | 0.11              |                   |                   |
| <b>RBr+RBr@A<sub>Te</sub>+A<sub>Te</sub></b>                     | -1.46                                                                                                                                | -0.83             | 0.50              | -1.33                        |                              |                              |       | 0.06              | 0.33              |                   |                   |
| <b>RBr+RI@A<sub>Te</sub>+A<sub>Te</sub></b>                      | -1.47                                                                                                                                | -0.89             | 0.50              | -1.39                        |                              |                              |       | 0.19              | 0.31              |                   |                   |
| <b>RI+RI@A<sub>Te</sub>+A<sub>Te</sub></b>                       | -2.81                                                                                                                                | -0.87             | 0.32              | -1.19                        |                              |                              |       | 0.24              | 0.26              |                   |                   |
| <b>C<sub>9</sub>H<sub>20</sub>@A<sub>Te</sub>+A<sub>Te</sub></b> | -1.25                                                                                                                                | -0.85             | 0.17              | -1.01                        |                              |                              |       | 0.05              | 0.12              |                   |                   |
|                                                                  | <b>RX &amp; RX' &amp; A<sub>Y</sub>+A<sub>Y'</sub></b>                                                                               |                   |                   |                              |                              |                              |       |                   |                   |                   |                   |
| <b>RBr+RBr@A<sub>Se</sub>+A<sub>Se</sub></b>                     | -3.34                                                                                                                                | -1.19             | 0.10              | -0.35                        | -0.34                        | -0.08                        | -0.52 | 0.00              | 0.05              | 0.05              |                   |
| <b>RBr+RI@A<sub>Se</sub>+A<sub>Se</sub></b>                      | -1.95                                                                                                                                | -1.22             | 0.08              | -0.41                        | -0.25                        | -0.06                        | -0.57 | 0.01              | 0.03              | 0.04              |                   |
| <b>RI+RI@A<sub>Se</sub>+A<sub>Se</sub></b>                       | -1.98                                                                                                                                | -1.28             | 0.05              | -0.32                        | -0.31                        | -0.06                        | -0.65 | 0.01              | 0.02              | 0.02              |                   |
| <b>RBr+RBr@A<sub>Se</sub>+A<sub>Te</sub></b>                     | -1.90                                                                                                                                | -1.17             | 0.10              | -0.34                        | -0.42                        | -0.06                        | -0.44 | 0.01              | 0.04              | 0.05              |                   |
| <b>RBr+RI@A<sub>Se</sub>+A<sub>Te</sub></b>                      | -1.93                                                                                                                                | -1.23             | 0.10              | -0.48                        | -0.26                        | -0.06                        | -0.53 | 0.03              | 0.03              | 0.04              |                   |
| <b>RI+RBr@A<sub>Se</sub>+A<sub>Te</sub></b>                      | -1.95                                                                                                                                | -1.24             | 0.07              | -0.43                        | -0.34                        | 0.00                         | -0.53 | 0.01              | 0.02              | 0.04              |                   |
| <b>RI+RI@A<sub>Se</sub>+A<sub>Te</sub></b>                       | -1.90                                                                                                                                | -1.23             | 0.22              | -0.34                        | -0.39                        | -0.08                        | -0.63 | 0.16              | 0.03              | 0.03              |                   |
| <b>RBr+RBr@A<sub>Te</sub>+A<sub>Te</sub></b>                     | -1.93                                                                                                                                | -1.19             | 0.15              | -0.45                        | -0.46                        | -0.03                        | -0.40 | 0.06              | 0.05              | 0.05              |                   |
| <b>RBr+RI@A<sub>Te</sub>+A<sub>Te</sub></b>                      | -1.74                                                                                                                                | -1.08             | 0.32              | -0.36                        | -0.52                        | -0.07                        | -0.45 | 0.19              | 0.06              | 0.07              |                   |
| <b>RI+RI@A<sub>Te</sub>+A<sub>Te</sub></b>                       | -1.72                                                                                                                                | -1.12             | 0.34              | -0.43                        | -0.44                        | -0.07                        | -0.52 | 0.24              | 0.05              | 0.05              |                   |
|                                                                  | <b>RX &amp; RX' &amp; A<sub>Y</sub> &amp; A<sub>Y'</sub> OR C<sub>9</sub>H<sub>20</sub> &amp; A<sub>Y</sub> &amp; A<sub>Y'</sub></b> |                   |                   |                              |                              |                              |       |                   |                   |                   |                   |
| <b>RBr+RBr@A<sub>Se</sub>+A<sub>Se</sub></b>                     | -7.29                                                                                                                                | -2.96             | 0.71              |                              |                              |                              |       | 0.30              | 0.30              | 0.05              | 0.05              |
| <b>RBr+RI@A<sub>Se</sub>+A<sub>Se</sub></b>                      | -4.70                                                                                                                                | -2.96             | 0.64              |                              |                              |                              |       | 0.29              | 0.28              | 0.03              | 0.04              |
| <b>RI+RI@A<sub>Se</sub>+A<sub>Se</sub></b>                       | -4.73                                                                                                                                | -3.03             | 0.60              |                              |                              |                              |       | 0.28              | 0.28              | 0.02              | 0.02              |
| <b>C<sub>9</sub>H<sub>20</sub>@A<sub>Se</sub>+A<sub>Se</sub></b> | -5.95                                                                                                                                | -2.67             | 0.71              |                              |                              |                              |       | 0.34              | 0.36              | 0.01              |                   |
| <b>RBr+RBr@A<sub>Se</sub>+A<sub>Te</sub></b>                     | -5.81                                                                                                                                | -3.93             | 1.12              |                              |                              |                              |       | 0.46              | 0.57              | 0.04              | 0.05              |
| <b>RBr+RI@A<sub>Se</sub>+A<sub>Te</sub></b>                      | -5.84                                                                                                                                | -3.98             | 1.11              |                              |                              |                              |       | 0.58              | 0.46              | 0.03              | 0.04              |
| <b>RI+RBr@A<sub>Se</sub>+A<sub>Te</sub></b>                      | -5.86                                                                                                                                | -4.00             | 1.06              |                              |                              |                              |       | 0.45              | 0.55              | 0.02              | 0.04              |
| <b>RI+RI@A<sub>Se</sub>+A<sub>Te</sub></b>                       | -5.81                                                                                                                                | -3.97             | 1.21              |                              |                              |                              |       | 0.50              | 0.64              | 0.03              | 0.03              |
| <b>C<sub>9</sub>H<sub>20</sub>@A<sub>Se</sub>+A<sub>Te</sub></b> | -5.18                                                                                                                                | -3.57             | 1.29              |                              |                              |                              |       | 0.53              | 0.64              | 0.11              |                   |
| <b>RBr+RBr@A<sub>Te</sub>+A<sub>Te</sub></b>                     | -7.81                                                                                                                                | -5.80             | 2.14              |                              |                              |                              |       | 1.02              | 1.03              | 0.05              | 0.05              |
| <b>RBr+RI@A<sub>Te</sub>+A<sub>Te</sub></b>                      | -7.62                                                                                                                                | -5.68             | 2.43              |                              |                              |                              |       | 1.15              | 1.15              | 0.06              | 0.07              |
| <b>RI+RI@A<sub>Te</sub>+A<sub>Te</sub></b>                       | -7.59                                                                                                                                | -5.72             | 2.41              |                              |                              |                              |       | 1.15              | 1.16              | 0.05              | 0.05              |
| <b>C<sub>9</sub>H<sub>20</sub>@A<sub>Te</sub>+A<sub>Te</sub></b> | -7.12                                                                                                                                | -5.42             | 2.42              |                              |                              |                              |       | 1.15              | 1.15              | 0.12              |                   |



<sup>a</sup> Uncorrected BSSE dissociation energy.

<sup>b</sup> Total deformation energy.

<sup>c</sup> 2-Body term with respect to dimer (first group); cage + guests (second group); cage + 1<sup>st</sup> guests (third group).

<sup>d</sup> 2-Body term with respect to cage + 2<sup>nd</sup> guest (third group).

<sup>e</sup> 2-Body term with respect to 1<sup>st</sup> guest + 2<sup>nd</sup> guest (third group).

<sup>f</sup> Deformation energy of the cage (second group); of the cage; of the 1<sup>st</sup> cavita<sup>nd</sup> (third group).

<sup>g</sup> Deformation energy of the encapsulation dimer or of nonane (second group); of the 1<sup>st</sup> guest (third group); of the 2<sup>nd</sup> cavita<sup>nd</sup> (forth group)

<sup>h</sup> Deformation energy of the 2<sup>nd</sup> guest (third group); of the 1<sup>st</sup> guest (forth group).

<sup>i</sup> Deformation energy of the 2<sup>nd</sup> guest (forth group).

**Table 8S.** HOMO-LUMO molecular orbital gaps in eV.

|                                | $A_{Se}+A_{Se}$ | $A_{Se}+A_{Te}$ | $A_{Te}+A_{Te}$ | $A'_{Se}+A'_{Se}$ | $A'_{Se}+A'_{Te}$ | $A'_{Te}+A'_{Te}$ | $A_{Te}+A_{Te}$ |
|--------------------------------|-----------------|-----------------|-----------------|-------------------|-------------------|-------------------|-----------------|
| --                             | 5.568           | 4.786           | 4.544           | 5.642             | 4.769             | 4.535             | 4.544           |
| 2RBr                           | 5.476           | 4.558           | 4.435           | 5.482             | 4.541             | 4.432             | 4.435           |
| RBr-RI                         | 5.155           | 4.543           | 4.413           | 5.165             | 4.536             | 4.404             | 4.413           |
| RBr-RI                         | 5.155           | 4.477           | 4.413           | 5.165             | 4.475             | 4.404             | 4.413           |
| 2RI                            | 4.892           | 4.677           | 4.421           | 4.9               | 4.689             | 4.417             | 4.421           |
| C <sub>9</sub> H <sub>20</sub> | 5.530           | 4.746           | 4.487           | 5.565             | 4.746             | 4.482             | 4.487           |

**Table 9S:** Geometries of the minimum calculated structures at M06-2X/LAN2LDZ and 6-31G(d,p) .

| M06-2X/6-31G(d,p)                           |             |                         |           |           |           |
|---------------------------------------------|-------------|-------------------------|-----------|-----------|-----------|
| <i>n</i> -C <sub>4</sub> H <sub>9</sub> Br, |             |                         |           |           |           |
| Atom                                        | Atomic Type | Coordinates (Angstroms) |           |           |           |
|                                             |             | X                       | Y         | Z         |           |
| 1                                           | 6           | 0                       | -0.039738 | 0.781365  | 0.000227  |
| 2                                           | 1           | 0                       | -0.040410 | 1.410996  | -0.889571 |
| 3                                           | 1           | 0                       | -0.040612 | 1.410707  | 0.890240  |
| 4                                           | 6           | 0                       | 1.109529  | -0.208305 | 0.000194  |
| 5                                           | 6           | 0                       | 2.462528  | 0.505762  | -0.000266 |
| 6                                           | 1           | 0                       | 1.026835  | -0.856746 | -0.879106 |
| 7                                           | 1           | 0                       | 1.027116  | -0.856230 | 0.879908  |
| 8                                           | 6           | 0                       | 3.627582  | -0.480537 | 0.000004  |
| 9                                           | 1           | 0                       | 2.529526  | 1.158679  | -0.879048 |
| 10                                          | 1           | 0                       | 2.529808  | 1.159131  | 0.878126  |
| 11                                          | 1           | 0                       | 4.589280  | 0.037859  | 0.000331  |
| 12                                          | 1           | 0                       | 3.591690  | -1.125082 | 0.883313  |
| 13                                          | 1           | 0                       | 3.592237  | -1.124927 | -0.883400 |
| 14                                          | 35          | 0                       | -1.764711 | -0.137260 | -0.000050 |

  

| M06-2X/LAN2LDZ                              |             |                         |           |           |           |
|---------------------------------------------|-------------|-------------------------|-----------|-----------|-----------|
| <i>n</i> -C <sub>4</sub> H <sub>9</sub> Br, |             |                         |           |           |           |
| Atom                                        | Atomic Type | Coordinates (Angstroms) |           |           |           |
|                                             |             | X                       | Y         | Z         |           |
| 1                                           | 6           | 0                       | 4.111516  | -0.520232 | -0.000063 |
| 2                                           | 6           | 0                       | 2.969028  | 0.492489  | -0.000051 |
| 3                                           | 1           | 0                       | 5.084352  | -0.023012 | 0.000049  |
| 4                                           | 1           | 0                       | 4.061715  | -1.163581 | 0.883405  |
| 5                                           | 1           | 0                       | 4.061902  | -1.163477 | -0.883598 |
| 6                                           | 6           | 0                       | 1.599149  | -0.191584 | 0.000150  |
| 7                                           | 1           | 0                       | 3.050160  | 1.143801  | 0.878561  |
| 8                                           | 1           | 0                       | 3.049871  | 1.143690  | -0.878777 |
| 9                                           | 1           | 0                       | 1.508375  | -0.838949 | -0.879177 |
| 10                                          | 1           | 0                       | 1.508324  | -0.838490 | 0.879818  |
| 11                                          | 6           | 0                       | 0.477651  | 0.832376  | 0.000022  |
| 12                                          | 1           | 0                       | 0.496247  | 1.463223  | -0.888648 |
| 13                                          | 1           | 0                       | 0.496211  | 1.463152  | 0.888758  |
| 14                                          | 53          | 0                       | -1.476627 | -0.091786 | -0.000014 |

| Atom | Atomic Type | Coordinates (Angstroms) |           |           |           |
|------|-------------|-------------------------|-----------|-----------|-----------|
|      |             | X                       | Y         | Z         |           |
| 1    | 6           | 0                       | -0.008154 | 0.799984  | 0.000006  |
| 2    | 1           | 0                       | -0.011894 | 1.423804  | -0.894477 |
| 3    | 1           | 0                       | -0.012005 | 1.423995  | 0.894354  |
| 4    | 6           | 0                       | 1.137084  | -0.206588 | 0.000279  |
| 5    | 6           | 0                       | 2.501695  | 0.510506  | -0.000020 |
| 6    | 1           | 0                       | 1.059998  | -0.854067 | -0.881330 |
| 7    | 1           | 0                       | 1.060068  | -0.853484 | 0.882337  |
| 8    | 6           | 0                       | 3.664533  | -0.495191 | -0.000137 |
| 9    | 1           | 0                       | 2.574520  | 1.160997  | -0.881428 |
| 10   | 1           | 0                       | 2.574902  | 1.161011  | 0.881332  |
| 11   | 1           | 0                       | 4.632969  | 0.014798  | 0.000377  |
| 12   | 1           | 0                       | 3.619997  | -1.139321 | 0.885163  |
| 13   | 1           | 0                       | 3.620573  | -1.138573 | -0.885974 |
| 14   | 35          | 0                       | -1.796859 | -0.138612 | -0.000032 |

| <i>n</i> -C <sub>4</sub> H <sub>9</sub> I, |             |                         |           |           |           |
|--------------------------------------------|-------------|-------------------------|-----------|-----------|-----------|
| Atom                                       | Atomic Type | Coordinates (Angstroms) |           |           |           |
|                                            |             | X                       | Y         | Z         |           |
| 1                                          | 6           | 0                       | 0.487499  | 0.847688  | 0.000201  |
| 2                                          | 1           | 0                       | 0.505960  | 1.474879  | -0.892524 |
| 3                                          | 1           | 0                       | 0.505782  | 1.474756  | 0.893016  |
| 4                                          | 6           | 0                       | 1.611852  | -0.187112 | 0.000269  |
| 5                                          | 6           | 0                       | 2.992846  | 0.498964  | -0.000249 |
| 6                                          | 1           | 0                       | 1.523035  | -0.834143 | -0.880905 |
| 7                                          | 1           | 0                       | 1.523322  | -0.833514 | 0.881931  |
| 8                                          | 6           | 0                       | 4.133014  | -0.532454 | -0.000024 |
| 9                                          | 1           | 0                       | 3.079016  | 1.147395  | -0.881917 |
| 10                                         | 1           | 0                       | 3.079402  | 1.148117  | 0.880840  |
| 11                                         | 1           | 0                       | 5.112650  | -0.044217 | -0.000095 |
| 12                                         | 1           | 0                       | 4.074523  | -1.174931 | 0.885708  |
| 13                                         | 1           | 0                       | 4.074575  | -1.175290 | -0.885491 |
| 14                                         | 53          | 0                       | -1.487350 | -0.093313 | -0.000033 |

| <b>A<sub>Se</sub>+A<sub>Se</sub></b> |             |                         |           |           |           |
|--------------------------------------|-------------|-------------------------|-----------|-----------|-----------|
| Atom                                 | Atomic Type | Coordinates (Angstroms) |           |           |           |
|                                      |             | X                       | Y         | Z         |           |
| 1                                    | 34          | 0                       | 0.062546  | 3.452699  | -3.477167 |
| 2                                    | 8           | 0                       | -6.129327 | 2.408324  | -4.345238 |
| 3                                    | 34          | 0                       | 0.061919  | -3.477444 | -3.451422 |
| 4                                    | 7           | 0                       | -1.264002 | 4.357357  | -2.530342 |
| 5                                    | 8           | 0                       | -6.129276 | -2.436694 | -4.328410 |
| 6                                    | 34          | 0                       | 0.063164  | 3.477823  | 3.451703  |
| 7                                    | 7           | 0                       | -1.264514 | 2.500182  | -4.375068 |
| 8                                    | 34          | 0                       | 0.062604  | -3.451871 | 3.476450  |
| 9                                    | 8           | 0                       | -6.128773 | 4.329822  | -2.436581 |

|    |   |   |            |           |           |     |    |   |            |           |           |
|----|---|---|------------|-----------|-----------|-----|----|---|------------|-----------|-----------|
| 10 | 7 | 0 | -1.264521  | -2.529551 | -4.355037 | 66  | 6  | 0 | -2.464896  | -2.927577 | -3.944174 |
| 11 | 8 | 0 | -6.130008  | -4.346494 | -2.408238 | 67  | 6  | 0 | -2.465288  | -3.967257 | -2.900545 |
| 12 | 7 | 0 | -1.265160  | -4.376941 | -2.500332 | 68  | 6  | 0 | -3.718608  | -4.449682 | -2.378954 |
| 13 | 6 | 0 | -9.911767  | 2.544824  | -2.560512 | 69  | 1  | 0 | -3.719614  | -5.254647 | -1.654912 |
| 14 | 1 | 0 | -10.294935 | 3.535060  | -2.295319 | 70  | 6  | 0 | -6.652703  | -1.189093 | 3.850652  |
| 15 | 8 | 0 | -6.129085  | -2.408460 | 4.347025  | 71  | 6  | 0 | -7.778167  | -1.224794 | 3.012034  |
| 16 | 7 | 0 | -1.263256  | 2.529816  | 4.355303  | 72  | 6  | 0 | -8.314591  | 0.008380  | 2.605372  |
| 17 | 6 | 0 | -8.373130  | 2.565376  | -2.581588 | 73  | 1  | 0 | -9.190746  | 0.006419  | 1.963413  |
| 18 | 1 | 0 | -8.052507  | 3.301879  | -3.323061 | 74  | 6  | 0 | -7.777844  | 1.244141  | 3.003524  |
| 19 | 8 | 0 | -6.127949  | 2.436520  | 4.329113  | 75  | 6  | 0 | -6.651984  | 1.213825  | 3.841823  |
| 20 | 7 | 0 | -1.264116  | 4.377118  | 2.500663  | 76  | 6  | 0 | -6.096436  | 0.013847  | 4.283237  |
| 21 | 6 | 0 | -7.778917  | 1.224800  | -3.011276 | 77  | 1  | 0 | -5.273302  | 0.016245  | 4.987019  |
| 22 | 8 | 0 | -6.128919  | 4.346290  | 2.408532  | 78  | 6  | 0 | -4.876288  | 3.898214  | 2.841822  |
| 23 | 6 | 0 | -6.653217  | 1.188906  | -3.849554 | 79  | 6  | 0 | -4.875770  | 2.867300  | 3.877464  |
| 24 | 7 | 0 | -1.264313  | -2.500948 | 4.376311  | 80  | 6  | 0 | -3.716416  | 2.407621  | 4.430032  |
| 25 | 6 | 0 | -6.097261  | -0.014042 | -4.282396 | 81  | 1  | 0 | -3.716466  | 1.687066  | 5.238101  |
| 26 | 1 | 0 | -5.274089  | -0.016563 | -4.986109 | 82  | 6  | 0 | -2.463687  | 2.927822  | 3.944637  |
| 27 | 7 | 0 | -1.264009  | -4.354741 | 2.528026  | 83  | 6  | 0 | -2.464190  | 3.967482  | 2.900968  |
| 28 | 8 | 0 | -6.128808  | -4.328378 | 2.436727  | 84  | 6  | 0 | -3.717557  | 4.449735  | 2.379338  |
| 29 | 6 | 0 | -6.653210  | -1.213932 | -3.841251 | 85  | 1  | 0 | -3.718655  | 5.254593  | 1.655173  |
| 30 | 6 | 0 | -7.779184  | -1.244114 | -3.003108 | 86  | 6  | 0 | -8.372376  | 2.581829  | 2.565264  |
| 31 | 6 | 0 | -8.315828  | -0.008271 | -2.604963 | 87  | 1  | 0 | -8.051737  | 3.323083  | 3.301975  |
| 32 | 1 | 0 | -9.192197  | -0.006195 | -1.963295 | 88  | 6  | 0 | -9.911025  | 2.560985  | 2.544549  |
| 33 | 6 | 0 | -7.778343  | 3.003813  | -1.244067 | 89  | 1  | 0 | -10.320569 | 1.841578  | 1.827728  |
| 34 | 6 | 0 | -8.314775  | 2.605365  | -0.008238 | 90  | 1  | 0 | -10.294339 | 2.295651  | 3.534690  |
| 35 | 1 | 0 | -9.190896  | 1.963361  | -0.006196 | 91  | 6  | 0 | -2.464328  | -3.944176 | 2.926604  |
| 36 | 6 | 0 | -7.778046  | 3.011803  | 1.224849  | 92  | 6  | 0 | -2.464516  | -2.901173 | 3.966945  |
| 37 | 6 | 0 | -6.652669  | 3.850534  | 1.189018  | 93  | 6  | 0 | -3.717711  | -2.379813 | 4.449962  |
| 38 | 6 | 0 | -6.096812  | 4.283531  | -0.013933 | 94  | 1  | 0 | -3.718553  | -1.656029 | 5.255167  |
| 39 | 1 | 0 | -5.273784  | 4.987431  | -0.016451 | 95  | 6  | 0 | -4.876614  | -2.841903 | 3.898483  |
| 40 | 6 | 0 | -6.652615  | 3.842281  | -1.213881 | 96  | 6  | 0 | -4.876420  | -3.876992 | 2.867018  |
| 41 | 6 | 0 | -4.876460  | 3.878295  | -2.867180 | 97  | 6  | 0 | -3.717222  | -4.429251 | 2.406554  |
| 42 | 6 | 0 | -3.717231  | 4.431695  | -2.408203 | 98  | 1  | 0 | -3.717481  | -5.237026 | 1.685672  |
| 43 | 1 | 0 | -3.717490  | 5.240557  | -1.688533 | 99  | 6  | 0 | -9.911706  | -2.543744 | 2.561703  |
| 44 | 6 | 0 | -2.464387  | 3.945996  | -2.927879 | 100 | 1  | 0 | -10.294659 | -2.274379 | 3.550893  |
| 45 | 6 | 0 | -2.464703  | 2.900935  | -3.966120 | 101 | 1  | 0 | -10.321164 | -1.826927 | 1.842243  |
| 46 | 6 | 0 | -7.778954  | -3.003390 | 1.244343  | 102 | 6  | 0 | -4.876773  | 2.841678  | -3.897135 |
| 47 | 6 | 0 | -3.717934  | 2.378667  | -4.447990 | 103 | 34 | 0 | -0.063348  | -4.900221 | 0.017704  |
| 48 | 1 | 0 | -3.718796  | 1.653745  | -5.252164 | 104 | 8  | 0 | 6.128522   | -4.786783 | -1.336049 |
| 49 | 6 | 0 | -8.373800  | -2.581813 | -2.564912 | 105 | 34 | 0 | -0.063675  | -0.017754 | -4.897978 |
| 50 | 1 | 0 | -8.053262  | -3.323056 | -3.301687 | 106 | 7  | 0 | 1.263238   | -4.859174 | 1.326490  |
| 51 | 6 | 0 | -9.912431  | -2.560842 | -2.544024 | 107 | 8  | 0 | 6.127617   | -1.373477 | -4.774560 |
| 52 | 1 | 0 | -10.295782 | -3.549993 | -2.275075 | 108 | 34 | 0 | -0.061958  | 0.017615  | 4.899543  |
| 53 | 6 | 0 | -8.315857  | -2.605357 | 0.008614  | 109 | 7  | 0 | 1.263653   | -4.872661 | -1.291068 |
| 54 | 1 | 0 | -9.192175  | -1.963620 | 0.006689  | 110 | 34 | 0 | -0.061594  | 4.901453  | -0.017795 |
| 55 | 6 | 0 | -7.779265  | -3.011810 | -1.224581 | 111 | 8  | 0 | 6.128091   | -4.774336 | 1.372348  |
| 56 | 6 | 0 | -6.653729  | -3.850305 | -1.188866 | 112 | 7  | 0 | 1.262848   | -1.326699 | -4.858495 |
| 57 | 6 | 0 | -6.097459  | -4.282954 | 0.014036  | 113 | 8  | 0 | 6.128442   | 1.335055  | -4.785830 |
| 58 | 1 | 0 | -5.274335  | -4.986723 | 0.016382  | 114 | 7  | 0 | 1.263564   | 1.290868  | -4.869832 |
| 59 | 6 | 0 | -6.652983  | -3.841541 | 1.213994  | 115 | 6  | 0 | 9.911328   | -3.611052 | 0.013805  |
| 60 | 6 | 0 | -8.373073  | -2.565021 | 2.582183  | 116 | 1  | 0 | 10.320809  | -2.595483 | 0.009477  |
| 61 | 1 | 0 | -8.052513  | -3.301830 | 3.323371  | 117 | 1  | 0 | 10.294815  | -4.118166 | 0.904592  |
| 62 | 6 | 0 | -4.877388  | -3.898236 | -2.841423 | 118 | 8  | 0 | 6.130436   | 4.785291  | 1.334713  |
| 63 | 6 | 0 | -4.876963  | -2.867236 | -3.876968 | 119 | 7  | 0 | 1.264529   | 1.326433  | 4.858153  |
| 64 | 6 | 0 | -3.717650  | -2.407400 | -4.429491 | 120 | 6  | 0 | 8.372694   | -3.640319 | 0.014142  |
| 65 | 1 | 0 | -3.717705  | -1.686905 | -5.237612 | 121 | 1  | 0 | 8.051987   | -4.685355 | 0.018580  |

|     |   |   |           |           |           |                                      |        |                         |            |           |           |
|-----|---|---|-----------|-----------|-----------|--------------------------------------|--------|-------------------------|------------|-----------|-----------|
| 122 | 8 | 0 | 6.129330  | 1.372562  | 4.773843  | 178                                  | 6      | 0                       | 6.653652   | 1.883689  | 3.561009  |
| 123 | 7 | 0 | 1.265008  | -1.291174 | 4.872223  | 179                                  | 6      | 0                       | 6.098020   | 3.040344  | 3.016008  |
| 124 | 6 | 0 | 7.778111  | -3.005644 | -1.242356 | 180                                  | 1      | 0                       | 5.274749   | 3.539835  | 3.511524  |
| 125 | 8 | 0 | 6.129853  | -1.335765 | 4.785652  | 181                                  | 6      | 0                       | 4.877302   | -0.712555 | 4.770424  |
| 126 | 6 | 0 | 6.652484  | -3.577648 | -1.856352 | 182                                  | 6      | 0                       | 4.877019   | 0.748694  | 4.763447  |
| 127 | 7 | 0 | 1.265552  | 4.872477  | 1.290810  | 183                                  | 6      | 0                       | 3.717744   | 1.465092  | 4.823860  |
| 128 | 6 | 0 | 6.096323  | -3.041520 | -3.016884 | 184                                  | 1      | 0                       | 3.717849   | 2.546420  | 4.877756  |
| 129 | 1 | 0 | 5.272974  | -3.540980 | -3.512318 | 185                                  | 6      | 0                       | 2.464915   | 0.754406  | 4.853507  |
| 130 | 7 | 0 | 1.264742  | 4.860835  | -1.326838 | 186                                  | 6      | 0                       | 2.465194   | -0.718691 | 4.861180  |
| 131 | 8 | 0 | 6.129453  | 4.774609  | -1.373677 | 187                                  | 6      | 0                       | 3.718436   | -1.428894 | 4.838393  |
| 132 | 6 | 0 | 6.651927  | -1.884857 | -3.561844 | 188                                  | 1      | 0                       | 3.719164   | -2.509606 | 4.903378  |
| 133 | 6 | 0 | 7.777833  | -1.266560 | -2.995005 | 189                                  | 6      | 0                       | 8.373861   | 0.013989  | 3.639184  |
| 134 | 6 | 0 | 8.314664  | -1.850437 | -1.835389 | 190                                  | 1      | 0                       | 8.053319   | 0.018404  | 4.684272  |
| 135 | 1 | 0 | 9.190619  | -1.394427 | -1.383083 | 191                                  | 6      | 0                       | 2.465186   | 4.855531  | -0.754942 |
| 136 | 6 | 0 | 7.778622  | -2.995216 | 1.265476  | 192                                  | 6      | 0                       | 2.465657   | 4.861818  | 0.718171  |
| 137 | 6 | 0 | 8.315863  | -1.835817 | 1.849446  | 193                                  | 6      | 0                       | 3.718972   | 4.838191  | 1.428268  |
| 138 | 1 | 0 | 9.192106  | -1.383869 | 1.393642  | 194                                  | 1      | 0                       | 3.719783   | 4.902429  | 2.509021  |
| 139 | 6 | 0 | 7.779293  | -1.242545 | 3.004531  | 195                                  | 6      | 0                       | 4.877768   | 4.770492  | 0.711781  |
| 140 | 6 | 0 | 6.653476  | -1.856250 | 3.576472  | 196                                  | 6      | 0                       | 4.877285   | 4.764565  | -0.749494 |
| 141 | 6 | 0 | 6.096983  | -3.016598 | 3.040336  | 197                                  | 6      | 0                       | 3.717981   | 4.826141  | -1.465712 |
| 142 | 1 | 0 | 5.273552  | -3.511877 | 3.539806  | 198                                  | 1      | 0                       | 3.718106   | 4.880848  | -2.547011 |
| 143 | 6 | 0 | 6.652490  | -3.561676 | 1.883700  | 199                                  | 6      | 0                       | 9.912559   | 3.609147  | -0.015777 |
| 144 | 6 | 0 | 4.875747  | -4.763945 | 0.748594  | 200                                  | 1      | 0                       | 10.321718  | 2.593448  | -0.011806 |
| 145 | 6 | 0 | 3.716482  | -4.824423 | 1.465008  | 201                                  | 1      | 0                       | 10.295697  | 4.116243  | -0.906720 |
| 146 | 1 | 0 | 3.716613  | -4.878269 | 2.546348  | 202                                  | 6      | 0                       | 7.778924   | 2.994238  | -1.266325 |
| 147 | 6 | 0 | 2.463636  | -4.854144 | 0.754402  | 203                                  | 6      | 0                       | 4.876029   | -4.771146 | -0.712665 |
| 148 | 6 | 0 | 2.463895  | -4.861715 | -0.718651 | 204                                  | 6      | 0                       | 9.912479   | 0.013890  | 3.609675  |
| 149 | 6 | 0 | 3.717099  | -4.839086 | -1.428935 | 205                                  | 1      | 0                       | 10.321824  | 0.009706  | 2.594050  |
| 150 | 1 | 0 | 3.717796  | -4.904187 | -2.509640 | 206                                  | 1      | 0                       | 10.295895  | 0.904697  | 4.116797  |
| 151 | 6 | 0 | 8.372327  | -0.015352 | -3.639933 | 207                                  | 1      | 0                       | -10.321829 | -1.841476 | -1.827077 |
| 152 | 1 | 0 | 8.051609  | -0.019530 | -4.684965 | 208                                  | 1      | 0                       | -10.295846 | -2.295367 | -3.534090 |
| 153 | 6 | 0 | 9.910959  | -0.015623 | -3.610690 | 209                                  | 1      | 0                       | -10.294310 | 3.550147  | 2.275541  |
| 154 | 1 | 0 | 10.294427 | 0.871033  | -4.124981 | 210                                  | 1      | 0                       | -10.295455 | -3.533802 | 2.296676  |
| 155 | 1 | 0 | 10.320471 | -0.011666 | -2.595129 | 211                                  | 1      | 0                       | -10.321292 | 1.828201  | -1.840897 |
| 156 | 6 | 0 | 8.315255  | 1.834310  | -1.850127 | 212                                  | 1      | 0                       | -10.295234 | 2.275664  | -3.549563 |
| 157 | 1 | 0 | 9.191185  | 1.381816  | -1.394262 | 213                                  | 1      | 0                       | 10.294463  | -4.125499 | -0.872902 |
| 158 | 6 | 0 | 7.778253  | 1.241292  | -3.005101 | 214                                  | 1      | 0                       | 10.294066  | -0.906467 | -4.117988 |
| 159 | 6 | 0 | 6.652625  | 1.855500  | -3.576901 | 215                                  | 1      | 0                       | 10.296363  | 4.123371  | 0.870775  |
| 160 | 6 | 0 | 6.097003  | 3.016314  | -3.040909 | 216                                  | 1      | 0                       | 10.295828  | -0.872793 | 4.124010  |
| 161 | 1 | 0 | 5.273688  | 3.511967  | -3.540225 | -----                                |        |                         |            |           |           |
| 162 | 6 | 0 | 6.653160  | 3.561379  | -1.884545 | -----                                |        |                         |            |           |           |
| 163 | 6 | 0 | 8.373943  | 3.638945  | -0.015238 | <b>A<sub>Se</sub>+A<sub>Te</sub></b> |        |                         |            |           |           |
| 164 | 1 | 0 | 8.053610  | 4.684095  | -0.019352 | -----                                |        |                         |            |           |           |
| 165 | 6 | 0 | 4.875871  | 0.711885  | -4.770128 | -----                                |        |                         |            |           |           |
| 166 | 6 | 0 | 4.875426  | -0.749393 | -4.763950 | Atom                                 | Atomic | Coordinates (Angstroms) |            |           |           |
| 167 | 6 | 0 | 3.716062  | -1.465601 | -4.824788 |                                      | Type   | X                       | Y          | Z         |           |
| 168 | 1 | 0 | 3.716065  | -2.546902 | -4.879363 | -----                                |        |                         |            |           |           |
| 169 | 6 | 0 | 2.463285  | -0.754798 | -4.853649 | 1                                    | 6      | 0                       | -8.305689  | 2.020659  | 3.026874  |
| 170 | 6 | 0 | 2.463697  | 0.718273  | -4.859916 | 2                                    | 6      | 0                       | -7.710763  | 0.622636  | 3.190807  |
| 171 | 6 | 0 | 3.717025  | 1.428356  | -4.837161 | 3                                    | 6      | 0                       | -7.710557  | 2.708123  | 1.798691  |
| 172 | 1 | 0 | 3.717841  | 2.509110  | -4.901444 | 4                                    | 1      | 0                       | -7.986328  | 2.601217  | 3.896310  |
| 173 | 6 | 0 | 6.654130  | 3.576298  | 1.855418  | 5                                    | 6      | 0                       | -8.247912  | -0.509361 | 2.555163  |
| 174 | 6 | 0 | 7.779765  | 3.004240  | 1.241445  | 6                                    | 6      | 0                       | -6.584772  | 0.425708  | 4.005919  |
| 175 | 6 | 0 | 8.316369  | 1.849116  | 1.834538  | 7                                    | 6      | 0                       | -8.247344  | 2.555958  | 0.509287  |
| 176 | 1 | 0 | 9.192330  | 1.393105  | 1.382242  | 8                                    | 6      | 0                       | -6.584666  | 3.536264  | 1.930219  |
| 177 | 6 | 0 | 7.779493  | 1.265273  | 2.994201  | 9                                    | 6      | 0                       | -7.711168  | -1.798787 | 2.707419  |

|    |   |   |           |           |           |     |    |   |            |           |           |
|----|---|---|-----------|-----------|-----------|-----|----|---|------------|-----------|-----------|
| 10 | 6 | 0 | -6.029063 | -0.837988 | 4.199569  | 66  | 6  | 0 | -3.648455  | -1.480279 | -4.824163 |
| 11 | 8 | 0 | -6.060051 | 1.526881  | 4.727066  | 67  | 6  | 0 | -3.648333  | 4.825099  | -1.480630 |
| 12 | 6 | 0 | -7.710234 | 3.191630  | -0.622713 | 68  | 6  | 0 | -3.648697  | 3.217829  | -3.886750 |
| 13 | 6 | 0 | -6.028545 | 4.200381  | 0.837946  | 69  | 1  | 0 | -3.653524  | -5.481811 | 0.619378  |
| 14 | 8 | 0 | -6.060221 | 3.779112  | 3.224034  | 70  | 1  | 0 | -3.654255  | -2.674378 | 4.823651  |
| 15 | 6 | 0 | -8.306203 | -3.027009 | 2.019918  | 71  | 1  | 0 | -3.653778  | -4.823928 | -2.674395 |
| 16 | 6 | 0 | -6.585260 | -1.930265 | 3.535555  | 72  | 1  | 0 | -3.653132  | 0.618952  | 5.480867  |
| 17 | 1 | 0 | -5.206911 | -0.976197 | 4.890949  | 73  | 1  | 0 | -3.652391  | -0.619237 | -5.481248 |
| 18 | 6 | 0 | -4.808825 | 2.038525  | 4.370232  | 74  | 1  | 0 | -3.653564  | 4.824392  | 2.675135  |
| 19 | 6 | 0 | -8.305268 | 3.027640  | -2.020702 | 75  | 1  | 0 | -3.652421  | 5.482332  | -0.619703 |
| 20 | 6 | 0 | -6.584237 | 4.006755  | -0.425785 | 76  | 1  | 0 | -3.653172  | 2.674413  | -4.823690 |
| 21 | 1 | 0 | -5.206461 | 4.891832  | 0.976168  | 77  | 7  | 0 | -1.192479  | -1.617112 | -4.760371 |
| 22 | 6 | 0 | -4.808888 | 3.253539  | 3.559531  | 78  | 7  | 0 | -1.192973  | -3.776099 | -3.318071 |
| 23 | 1 | 0 | -7.986934 | -3.896423 | 2.600558  | 79  | 7  | 0 | -1.192540  | 3.318512  | -3.775801 |
| 24 | 6 | 0 | -7.711000 | -3.191012 | 0.622013  | 80  | 7  | 0 | -1.192307  | 4.761285  | -1.617123 |
| 25 | 8 | 0 | -6.060825 | -3.224002 | 3.778573  | 81  | 7  | 0 | -1.193024  | 3.776374  | 3.319285  |
| 26 | 6 | 0 | -7.710364 | 1.799291  | -2.708041 | 82  | 7  | 0 | -1.192902  | 1.616660  | 4.760441  |
| 27 | 1 | 0 | -7.985763 | 3.896918  | -2.601419 | 83  | 7  | 0 | -1.193617  | -3.318728 | 3.775909  |
| 28 | 8 | 0 | -6.059449 | 4.727946  | -1.526938 | 84  | 7  | 0 | -1.193370  | -4.761371 | 1.617214  |
| 29 | 6 | 0 | -8.247863 | -2.555323 | -0.510093 | 85  | 1  | 0 | -9.124526  | -1.926536 | -0.384616 |
| 30 | 6 | 0 | -6.585023 | -4.006200 | 0.425315  | 86  | 1  | 0 | -9.124595  | -0.383710 | 1.926433  |
| 31 | 6 | 0 | -4.809474 | -3.559479 | 3.253101  | 87  | 1  | 0 | -9.124049  | 1.927247  | 0.383658  |
| 32 | 6 | 0 | -2.397319 | 2.088072  | 4.452855  | 88  | 1  | 0 | -9.124306  | 0.384505  | -1.927453 |
| 33 | 6 | 0 | -8.247442 | 0.509991  | -2.555971 | 89  | 6  | 0 | -9.844237  | -2.002811 | -3.002552 |
| 34 | 6 | 0 | -6.584300 | 1.930604  | -3.535965 | 90  | 1  | 0 | -10.227825 | -1.548292 | -3.921173 |
| 35 | 6 | 0 | -4.808240 | 4.370977  | -2.038601 | 91  | 1  | 0 | -10.253206 | -1.437890 | -2.158348 |
| 36 | 6 | 0 | -2.397403 | 3.311340  | 3.636697  | 92  | 6  | 0 | -9.843919  | 3.002283  | -2.003709 |
| 37 | 6 | 0 | -7.710831 | -2.707550 | -1.799403 | 93  | 1  | 0 | -10.252862 | 2.158112  | -1.438718 |
| 38 | 6 | 0 | -6.029069 | -4.199870 | -0.838275 | 94  | 1  | 0 | -10.227572 | 2.932490  | -3.026222 |
| 39 | 8 | 0 | -6.060518 | -4.727328 | 1.526602  | 95  | 6  | 0 | -9.844336  | 2.003722  | 3.001236  |
| 40 | 6 | 0 | -4.809323 | -4.370523 | 2.038345  | 96  | 1  | 0 | -10.253156 | 1.438947  | 2.156858  |
| 41 | 6 | 0 | -7.710380 | -0.622086 | -3.191548 | 97  | 1  | 0 | -10.227930 | 3.026269  | 2.931614  |
| 42 | 6 | 0 | -6.028221 | 0.838271  | -4.199984 | 98  | 6  | 0 | -9.844852  | -3.001433 | 2.002704  |
| 43 | 8 | 0 | -6.059730 | 3.224341  | -3.778781 | 99  | 1  | 0 | -10.253611 | -2.157141 | 1.437764  |
| 44 | 6 | 0 | -4.808373 | 3.559784  | -3.253294 | 100 | 1  | 0 | -10.228629 | -2.931707 | 3.025174  |
| 45 | 6 | 0 | -8.305580 | -2.020007 | -3.027746 | 101 | 1  | 0 | -10.228667 | -3.919970 | 1.548207  |
| 46 | 6 | 0 | -6.584947 | -3.535743 | -1.930652 | 102 | 1  | 0 | -10.228025 | -3.025285 | -2.932946 |
| 47 | 1 | 0 | -5.206967 | -4.891334 | -0.976333 | 103 | 1  | 0 | -10.227659 | 3.920927  | -1.549369 |
| 48 | 6 | 0 | -2.397995 | -3.636451 | 3.311007  | 104 | 1  | 0 | -10.228252 | 1.549185  | 3.919710  |
| 49 | 6 | 0 | -6.584208 | -0.425334 | -4.006460 | 105 | 34 | 0 | 0.150094   | -4.074755 | 2.719844  |
| 50 | 1 | 0 | -5.205976 | 0.976372  | -4.891273 | 106 | 34 | 0 | 0.151108   | 4.074459  | -2.719661 |
| 51 | 6 | 0 | -2.396723 | 4.453478  | -2.088324 | 107 | 34 | 0 | 0.150569   | 2.719630  | 4.074527  |
| 52 | 1 | 0 | -7.986074 | -2.600637 | -3.897082 | 108 | 34 | 0 | 0.150840   | -2.719691 | -4.073402 |
| 53 | 8 | 0 | -6.060211 | -3.778700 | -3.224298 | 109 | 6  | 0 | 8.373166   | -3.570268 | -0.711291 |
| 54 | 6 | 0 | -2.397839 | -4.453302 | 2.088237  | 110 | 6  | 0 | 7.779754   | -3.188273 | 0.644125  |
| 55 | 8 | 0 | -6.059545 | -1.526607 | -4.727482 | 111 | 6  | 0 | 7.779656   | -2.697701 | -1.816536 |
| 56 | 6 | 0 | -2.396872 | 3.636572  | -3.311126 | 112 | 1  | 0 | 8.051462   | -4.594877 | -0.915579 |
| 57 | 6 | 0 | -4.808769 | -3.253219 | -3.559487 | 113 | 6  | 0 | 8.316466   | -2.168272 | 1.447626  |
| 58 | 6 | 0 | -4.808437 | -2.038329 | -4.370367 | 114 | 6  | 0 | 6.654103   | -3.867450 | 1.137120  |
| 59 | 6 | 0 | -2.397258 | -3.311149 | -3.635937 | 115 | 6  | 0 | 8.316716   | -1.447728 | -2.167689 |
| 60 | 6 | 0 | -2.396947 | -2.088139 | -4.452521 | 116 | 6  | 0 | 6.654162   | -3.135939 | -2.532654 |
| 61 | 6 | 0 | -3.649429 | -4.824693 | 1.480395  | 117 | 6  | 0 | 7.779396   | -1.816989 | 2.697564  |
| 62 | 6 | 0 | -3.649794 | -3.217660 | 3.886637  | 118 | 6  | 0 | 6.098601   | -3.563411 | 2.378907  |
| 63 | 6 | 0 | -3.648964 | 1.480239  | 4.824101  | 119 | 8  | 0 | 6.126461   | -4.951417 | 0.393903  |
| 64 | 6 | 0 | -3.649161 | 3.887164  | 3.218046  | 120 | 6  | 0 | 7.780184   | -0.644239 | -3.187801 |
| 65 | 6 | 0 | -3.649174 | -3.886827 | -3.217525 | 121 | 6  | 0 | 6.099155   | -2.379087 | -3.563234 |

|     |   |   |          |           |           |                                      |        |                         |           |           |           |
|-----|---|---|----------|-----------|-----------|--------------------------------------|--------|-------------------------|-----------|-----------|-----------|
| 122 | 8 | 0 | 6.126597 | -4.422068 | -2.262259 | 178                                  | 1      | 0                       | 3.712841  | -3.429057 | 4.280591  |
| 123 | 6 | 0 | 8.372986 | -0.711834 | 3.570189  | 179                                  | 1      | 0                       | 3.713808  | 4.280851  | 3.428994  |
| 124 | 6 | 0 | 6.653769 | -2.532916 | 3.135764  | 180                                  | 1      | 0                       | 3.713338  | -5.266563 | 1.525916  |
| 125 | 1 | 0 | 5.273686 | -4.146807 | 2.768380  | 181                                  | 1      | 0                       | 3.714324  | 5.266116  | -1.526030 |
| 126 | 6 | 0 | 4.872342 | -4.807822 | -0.212721 | 182                                  | 1      | 0                       | 3.713184  | -4.280173 | -3.428879 |
| 127 | 6 | 0 | 8.373730 | 0.711159  | -3.569674 | 183                                  | 1      | 0                       | 3.713975  | -1.526111 | -5.265768 |
| 128 | 6 | 0 | 6.654690 | -1.137290 | -3.867181 | 184                                  | 1      | 0                       | 3.713882  | 3.428776  | -4.279729 |
| 129 | 1 | 0 | 5.274338 | -2.768557 | -4.146781 | 185                                  | 7      | 0                       | 1.268299  | 4.991379  | -0.374551 |
| 130 | 6 | 0 | 4.872355 | -4.522276 | -1.647119 | 186                                  | 7      | 0                       | 1.268284  | 4.467562  | 2.260065  |
| 131 | 1 | 0 | 8.051215 | -0.916145 | 4.594771  | 187                                  | 7      | 0                       | 1.268216  | 2.259904  | -4.465923 |
| 132 | 6 | 0 | 7.779770 | 0.643673  | 3.188209  | 188                                  | 7      | 0                       | 1.268089  | -0.374552 | -4.990440 |
| 133 | 8 | 0 | 6.126236 | -2.262489 | 4.421899  | 189                                  | 7      | 0                       | 1.267503  | -4.466552 | -2.260016 |
| 134 | 6 | 0 | 7.780219 | 1.816440  | -2.697148 | 190                                  | 7      | 0                       | 1.267484  | -4.991437 | 0.374463  |
| 135 | 1 | 0 | 8.052143 | 0.915505  | -4.594306 | 191                                  | 7      | 0                       | 1.267232  | -2.260123 | 4.466498  |
| 136 | 8 | 0 | 6.127062 | -0.394084 | -4.951165 | 192                                  | 7      | 0                       | 1.267155  | 0.374760  | 4.989147  |
| 137 | 6 | 0 | 8.316660 | 1.447040  | 2.168197  | 193                                  | 1      | 0                       | 9.192101  | 1.089911  | 1.633447  |
| 138 | 6 | 0 | 6.654199 | 1.136913  | 3.867351  | 194                                  | 1      | 0                       | 9.191986  | -1.633502 | 1.090721  |
| 139 | 6 | 0 | 4.872069 | -1.647245 | 4.522125  | 195                                  | 1      | 0                       | 9.192127  | -1.090800 | -1.632752 |
| 140 | 6 | 0 | 2.446989 | -4.880064 | -0.213328 | 196                                  | 1      | 0                       | 9.192563  | 1.632755  | -1.090105 |
| 141 | 6 | 0 | 8.317164 | 2.167645  | -1.447143 | 197                                  | 6      | 0                       | 9.912437  | 3.541260  | 0.706306  |
| 142 | 6 | 0 | 6.654746 | 2.532531  | -3.135509 | 198                                  | 1      | 0                       | 10.295924 | 4.215311  | -0.066007 |
| 143 | 6 | 0 | 4.872993 | 0.212599  | -4.807433 | 199                                  | 1      | 0                       | 10.321543 | 2.544921  | 0.508491  |
| 144 | 6 | 0 | 2.446979 | -4.589163 | -1.674314 | 200                                  | 6      | 0                       | 9.912409  | 0.705406  | -3.541369 |
| 145 | 6 | 0 | 7.779951 | 2.697145  | 1.816957  | 201                                  | 1      | 0                       | 10.321521 | 0.507585  | -2.545031 |
| 146 | 6 | 0 | 6.099033 | 2.378862  | 3.563349  | 202                                  | 1      | 0                       | 10.295850 | 1.676723  | -3.869034 |
| 147 | 8 | 0 | 6.126210 | 0.393742  | 4.951166  | 203                                  | 6      | 0                       | 9.911850  | -3.542136 | -0.705673 |
| 148 | 6 | 0 | 4.872087 | -0.212761 | 4.807217  | 204                                  | 1      | 0                       | 10.321091 | -2.545842 | -0.507904 |
| 149 | 6 | 0 | 7.780465 | 3.187724  | -0.643719 | 205                                  | 1      | 0                       | 10.295175 | -3.869867 | -1.677013 |
| 150 | 6 | 0 | 6.099607 | 3.563104  | -2.378753 | 206                                  | 6      | 0                       | 9.911672  | -0.706337 | 3.542127  |
| 151 | 8 | 0 | 6.127321 | 2.262060  | -4.421670 | 207                                  | 1      | 0                       | 10.320975 | -0.508453 | 2.545880  |
| 152 | 6 | 0 | 4.873059 | 1.647010  | -4.521957 | 208                                  | 1      | 0                       | 10.294899 | -1.677758 | 3.869732  |
| 153 | 6 | 0 | 8.373754 | 3.569620  | 0.711774  | 209                                  | 52     | 0                       | -0.254736 | -0.950266 | 4.765466  |
| 154 | 6 | 0 | 6.654465 | 3.135631  | 2.532922  | 210                                  | 52     | 0                       | -0.254479 | -4.766431 | -0.950318 |
| 155 | 1 | 0 | 5.274188 | 2.768529  | 4.146725  | 211                                  | 52     | 0                       | -0.253679 | 4.766178  | 0.950140  |
| 156 | 6 | 0 | 2.446708 | -1.674329 | 4.588790  | 212                                  | 52     | 0                       | -0.253857 | 0.950270  | -4.765518 |
| 157 | 6 | 0 | 6.654984 | 3.867063  | -1.136889 | 213                                  | 1      | 0                       | 10.294991 | 0.065951  | 4.216300  |
| 158 | 1 | 0 | 5.274835 | 4.146624  | -2.768352 | 214                                  | 1      | 0                       | 10.295138 | -4.216176 | 0.066747  |
| 159 | 6 | 0 | 2.447642 | 0.213175  | -4.879270 | 215                                  | 1      | 0                       | 10.295709 | -0.067029 | -4.215384 |
| 160 | 1 | 0 | 8.052165 | 4.594269  | 0.916033  | 216                                  | 1      | 0                       | 10.295706 | 3.868838  | 1.677719  |
| 161 | 8 | 0 | 6.127262 | 4.421905  | 2.262464  | -----                                |        |                         |           |           |           |
| 162 | 6 | 0 | 2.446705 | -0.213187 | 4.878740  | -----                                |        |                         |           |           |           |
| 163 | 8 | 0 | 6.127359 | 4.951095  | -0.393756 | <b>A<sub>Te</sub>+A<sub>Te</sub></b> |        |                         |           |           |           |
| 164 | 6 | 0 | 2.447686 | 1.674178  | -4.588505 | -----                                |        |                         |           |           |           |
| 165 | 6 | 0 | 4.873103 | 4.522419  | 1.647239  | -----                                |        |                         |           |           |           |
| 166 | 6 | 0 | 4.873188 | 4.807687  | 0.212785  | Atom                                 | Atomic | Coordinates (Angstroms) |           |           |           |
| 167 | 6 | 0 | 2.447766 | 4.589613  | 1.674297  |                                      | Type   | X                       | Y         | Z         |           |
| 168 | 6 | 0 | 2.447823 | 4.880080  | 0.213233  | -----                                |        |                         |           |           |           |
| 169 | 6 | 0 | 3.712692 | 0.476527  | 4.997276  | 1                                    | 6      | 0                       | 8.310123  | 3.639366  | -0.055580 |
| 170 | 6 | 0 | 3.712684 | -2.356853 | 4.434578  | 2                                    | 6      | 0                       | 7.714038  | 2.975838  | -1.297111 |
| 171 | 6 | 0 | 3.712969 | -4.998559 | 0.476384  | 3                                    | 6      | 0                       | 7.719365  | 3.024064  | 1.211843  |
| 172 | 6 | 0 | 3.712991 | -4.434515 | -2.356724 | 4                                    | 1      | 0                       | 7.988864  | 4.684129  | -0.075138 |
| 173 | 6 | 0 | 3.713704 | 4.435004  | 2.356814  | 5                                    | 6      | 0                       | 8.253606  | 1.813669  | -1.872796 |
| 174 | 6 | 0 | 3.713856 | 4.998354  | -0.476435 | 6                                    | 6      | 0                       | 6.583160  | 3.531228  | -1.917315 |
| 175 | 6 | 0 | 3.713598 | -0.476543 | -4.997897 | 7                                    | 6      | 0                       | 8.253586  | 1.871961  | 1.814329  |
| 176 | 6 | 0 | 3.713707 | 2.356622  | -4.434080 | 8                                    | 6      | 0                       | 6.599570  | 3.607821  | 1.824819  |
| 177 | 1 | 0 | 3.713094 | 1.526173  | 5.264850  | 9                                    | 6      | 0                       | 7.718917  | 1.211238  | -3.024721 |

|    |   |   |          |           |           |     |    |   |           |           |           |
|----|---|---|----------|-----------|-----------|-----|----|---|-----------|-----------|-----------|
| 10 | 6 | 0 | 6.036752 | 2.983803  | -3.076316 | 66  | 6  | 0 | 3.626018  | -4.703973 | 1.464958  |
| 11 | 8 | 0 | 6.042516 | 4.733485  | -1.401026 | 67  | 6  | 0 | 3.626805  | 1.465076  | 4.703980  |
| 12 | 6 | 0 | 7.713681 | 1.296352  | 2.976388  | 68  | 6  | 0 | 3.663995  | -1.416608 | 4.879818  |
| 13 | 6 | 0 | 6.036904 | 3.076018  | 2.984097  | 69  | 1  | 0 | 3.621004  | -2.549115 | -4.713986 |
| 14 | 8 | 0 | 6.077274 | 4.818074  | 1.303814  | 70  | 1  | 0 | 3.680291  | 2.492739  | -5.004912 |
| 15 | 6 | 0 | 8.309206 | -0.056300 | -3.640229 | 71  | 1  | 0 | 3.679431  | -5.006824 | -2.493071 |
| 16 | 6 | 0 | 6.599058 | 1.824383  | -3.608169 | 72  | 1  | 0 | 3.622485  | 4.714267  | -2.548996 |
| 17 | 1 | 0 | 5.214191 | 3.474407  | -3.581652 | 73  | 1  | 0 | 3.621005  | -4.713391 | 2.548635  |
| 18 | 6 | 0 | 4.797688 | 4.708280  | -0.764573 | 74  | 1  | 0 | 3.681139  | 5.006227  | 2.492783  |
| 19 | 6 | 0 | 8.309535 | 0.054748  | 3.639998  | 75  | 1  | 0 | 3.621886  | 2.548754  | 4.713700  |
| 20 | 6 | 0 | 6.582864 | 1.916827  | 3.531584  | 76  | 1  | 0 | 3.680137  | -2.493014 | 5.005896  |
| 21 | 1 | 0 | 5.214397 | 3.581564  | 3.474580  | 77  | 7  | 0 | 1.177889  | -4.681588 | 1.308015  |
| 22 | 6 | 0 | 4.816352 | 4.783748  | 0.694269  | 78  | 7  | 0 | 1.211773  | -4.872995 | -1.337992 |
| 23 | 1 | 0 | 7.987634 | -0.075716 | -4.684898 | 79  | 7  | 0 | 1.212560  | -1.337855 | 4.872792  |
| 24 | 6 | 0 | 7.713057 | -1.297770 | -2.976641 | 80  | 7  | 0 | 1.178635  | 1.308151  | 4.681789  |
| 25 | 8 | 0 | 6.076329 | 1.303278  | -4.818163 | 81  | 7  | 0 | 1.213453  | 4.873612  | 1.337794  |
| 26 | 6 | 0 | 7.718848 | -1.212624 | 3.024515  | 82  | 7  | 0 | 1.179362  | 4.683021  | -1.308382 |
| 27 | 1 | 0 | 7.988013 | 0.074282  | 4.684683  | 83  | 7  | 0 | 1.212487  | 1.338068  | -4.871271 |
| 28 | 8 | 0 | 6.041785 | 1.400734  | 4.733762  | 84  | 7  | 0 | 1.178019  | -1.307990 | -4.681522 |
| 29 | 6 | 0 | 8.252760 | -1.873516 | -1.814581 | 85  | 1  | 0 | 9.128483  | -1.413062 | -1.366280 |
| 30 | 6 | 0 | 6.582121 | -1.917981 | -3.531900 | 86  | 1  | 0 | 9.129315  | 1.365337  | -1.412355 |
| 31 | 6 | 0 | 4.815325 | 0.693984  | -4.783427 | 87  | 1  | 0 | 9.129255  | 1.411290  | 1.366148  |
| 32 | 6 | 0 | 2.374261 | 4.754065  | -0.749177 | 88  | 1  | 0 | 9.129172  | -1.367222 | 1.412122  |
| 33 | 6 | 0 | 8.253276 | -1.815225 | 1.872547  | 89  | 6  | 0 | 9.847605  | -3.612876 | 0.058704  |
| 34 | 6 | 0 | 6.598818 | -1.825393 | 3.608018  | 90  | 1  | 0 | 10.228535 | -4.105871 | 0.958475  |
| 35 | 6 | 0 | 4.796953 | 0.764268  | 4.708092  | 91  | 1  | 0 | 10.257796 | -2.597749 | 0.039167  |
| 36 | 6 | 0 | 2.388623 | 4.857500  | 0.734034  | 92  | 6  | 0 | 9.848220  | 0.058278  | 3.611824  |
| 37 | 6 | 0 | 7.718246 | -3.025538 | -1.212155 | 93  | 1  | 0 | 10.258345 | 0.038843  | 2.596673  |
| 38 | 6 | 0 | 6.035871 | -3.077063 | -2.984491 | 94  | 1  | 0 | 10.233314 | -0.819077 | 4.140649  |
| 39 | 8 | 0 | 6.041139 | -1.401588 | -4.734001 | 95  | 6  | 0 | 9.848801  | 3.610784  | -0.059175 |
| 40 | 6 | 0 | 4.796445 | -0.764886 | -4.708215 | 96  | 1  | 0 | 10.258640 | 2.595519  | -0.039684 |
| 41 | 6 | 0 | 7.713217 | -2.977130 | 1.296817  | 97  | 1  | 0 | 10.234083 | 4.139559  | 0.818128  |
| 42 | 6 | 0 | 6.036036 | -2.984583 | 3.076132  | 98  | 6  | 0 | 9.847889  | -0.060282 | -3.612096 |
| 43 | 8 | 0 | 6.076412 | -1.304138 | 4.818083  | 99  | 1  | 0 | 10.258027 | -0.041016 | -2.596946 |
| 44 | 6 | 0 | 4.815523 | -0.694577 | 4.783589  | 100 | 1  | 0 | 10.233241 | 0.816971  | -4.140902 |
| 45 | 6 | 0 | 8.308921 | -3.640931 | 0.055252  | 101 | 52 | 0 | -0.359958 | -0.023334 | 4.824539  |
| 46 | 6 | 0 | 6.598359 | -3.609039 | -1.825191 | 102 | 52 | 0 | -0.360684 | -4.824328 | -0.023429 |
| 47 | 1 | 0 | 5.213247 | -3.582370 | -3.475021 | 103 | 52 | 0 | -0.358951 | 4.825561  | 0.023313  |
| 48 | 6 | 0 | 2.387549 | 0.734176  | -4.856022 | 104 | 52 | 0 | -0.360360 | 0.023922  | -4.823791 |
| 49 | 6 | 0 | 6.582130 | -3.532104 | 1.917032  | 105 | 1  | 0 | 10.228535 | -0.960120 | -4.105178 |
| 50 | 1 | 0 | 5.213339 | -3.474917 | 3.581498  | 106 | 1  | 0 | 10.232619 | -4.141810 | -0.818616 |
| 51 | 6 | 0 | 2.373502 | 0.749004  | 4.753243  | 107 | 1  | 0 | 10.229133 | 0.958019  | 4.104873  |
| 52 | 1 | 0 | 7.987306 | -4.685585 | 0.074904  | 108 | 1  | 0 | 10.229821 | 4.103671  | -0.958962 |
| 53 | 8 | 0 | 6.075682 | -4.819155 | -1.304244 | 109 | 6  | 0 | -8.309066 | -2.463000 | -2.680837 |
| 54 | 6 | 0 | 2.372989 | -0.749100 | -4.752977 | 110 | 6  | 0 | -7.713423 | -1.105155 | -3.053026 |
| 55 | 8 | 0 | 6.041033 | -4.734038 | 1.400524  | 111 | 6  | 0 | -7.718621 | -2.959776 | -1.362344 |
| 56 | 6 | 0 | 2.387760 | -0.734215 | 4.856868  | 112 | 1  | 0 | -7.987052 | -3.167338 | -3.452419 |
| 57 | 6 | 0 | 4.814776 | -4.784335 | -0.694643 | 113 | 6  | 0 | -8.253142 | 0.112028  | -2.605244 |
| 58 | 6 | 0 | 4.796182 | -4.708434 | 0.764181  | 114 | 6  | 0 | -6.582882 | -1.036675 | -3.883081 |
| 59 | 6 | 0 | 2.386986 | -4.857200 | -0.734334 | 115 | 6  | 0 | -8.253227 | -2.605108 | -0.111718 |
| 60 | 6 | 0 | 2.372748 | -4.753282 | 0.748857  | 116 | 6  | 0 | -6.598990 | -3.806567 | -1.364481 |
| 61 | 6 | 0 | 3.626155 | -1.465441 | -4.704071 | 117 | 6  | 0 | -7.718291 | 1.362578  | -2.959833 |
| 62 | 6 | 0 | 3.663937 | 1.416301  | -4.879132 | 118 | 6  | 0 | -6.036478 | 0.181181  | -4.282808 |
| 63 | 6 | 0 | 3.627500 | 4.704535  | -1.465324 | 119 | 8  | 0 | -6.042222 | -2.238285 | -4.400947 |
| 64 | 6 | 0 | 3.664884 | 4.880200  | 1.416374  | 120 | 6  | 0 | -7.713486 | -3.052980 | 1.105425  |
| 65 | 6 | 0 | 3.663247 | -4.880540 | -1.416689 | 121 | 6  | 0 | -6.036848 | -4.282926 | -0.181115 |

|     |   |   |           |           |           |
|-----|---|---|-----------|-----------|-----------|
| 122 | 8 | 0 | -6.076695 | -4.260460 | -2.601494 |
| 123 | 6 | 0 | -8.308481 | 2.681225  | -2.463148 |
| 124 | 6 | 0 | -6.598534 | 1.364591  | -3.806449 |
| 125 | 1 | 0 | -5.214398 | 0.210470  | -4.987079 |
| 126 | 6 | 0 | -4.797498 | -2.682854 | -3.944411 |
| 127 | 6 | 0 | -8.309115 | -2.680734 | 2.463261  |
| 128 | 6 | 0 | -6.583061 | -3.883184 | 1.036830  |
| 129 | 1 | 0 | -5.214803 | -4.987247 | -0.210507 |
| 130 | 6 | 0 | -4.815953 | -3.794039 | -2.996113 |
| 131 | 1 | 0 | -7.986300 | 3.452688  | -3.167537 |
| 132 | 6 | 0 | -7.712776 | 3.053391  | -1.105340 |
| 133 | 8 | 0 | -6.076085 | 2.601623  | -4.260003 |
| 134 | 6 | 0 | -7.718642 | -1.362210 | 2.959944  |
| 135 | 1 | 0 | -7.987065 | -3.452287 | 3.167621  |
| 136 | 8 | 0 | -6.042273 | -4.401352 | 2.238286  |
| 137 | 6 | 0 | -8.252510 | 2.605546  | 0.111789  |
| 138 | 6 | 0 | -6.582265 | 3.883514  | -1.036767 |
| 139 | 6 | 0 | -4.815359 | 2.996225  | -3.793620 |
| 140 | 6 | 0 | -2.373996 | -2.724405 | -3.966297 |
| 141 | 6 | 0 | -8.253249 | -0.111539 | 2.605369  |
| 142 | 6 | 0 | -6.598845 | -1.364435 | 3.806494  |
| 143 | 6 | 0 | -4.797557 | -3.944702 | 2.682829  |
| 144 | 6 | 0 | -2.388101 | -3.872947 | -3.022107 |
| 145 | 6 | 0 | -7.717876 | 2.960216  | 1.362425  |
| 146 | 6 | 0 | -6.035985 | 4.283175  | 0.181158  |
| 147 | 8 | 0 | -6.041537 | 4.401728  | -2.238243 |
| 148 | 6 | 0 | -4.796860 | 3.945071  | -2.682926 |
| 149 | 6 | 0 | -7.713196 | 1.105522  | 3.053013  |
| 150 | 6 | 0 | -6.036413 | -0.181129 | 4.282688  |
| 151 | 8 | 0 | -6.076681 | -2.601529 | 4.260202  |
| 152 | 6 | 0 | -4.815975 | -2.996213 | 3.793846  |
| 153 | 6 | 0 | -8.308490 | 2.463518  | 2.680867  |
| 154 | 6 | 0 | -6.598182 | 3.806888  | 1.364551  |
| 155 | 1 | 0 | -5.213856 | 4.987405  | 0.210525  |
| 156 | 6 | 0 | -2.387547 | 3.022078  | -3.872502 |
| 157 | 6 | 0 | -6.582539 | 1.036830  | 3.882934  |
| 158 | 1 | 0 | -5.214233 | -0.210599 | 4.986840  |
| 159 | 6 | 0 | -2.374032 | -3.966593 | 2.724277  |
| 160 | 1 | 0 | -7.986355 | 3.167766  | 3.452483  |
| 161 | 8 | 0 | -6.075803 | 4.260778  | 2.601536  |
| 162 | 6 | 0 | -2.373333 | 3.967165  | -2.724757 |
| 163 | 8 | 0 | -6.041622 | 2.238363  | 4.400681  |
| 164 | 6 | 0 | -2.388149 | -3.022173 | 3.872615  |
| 165 | 6 | 0 | -4.815150 | 3.794103  | 2.996119  |
| 166 | 6 | 0 | -4.796816 | 2.682776  | 3.944266  |
| 167 | 6 | 0 | -2.387314 | 3.872749  | 3.022149  |
| 168 | 6 | 0 | -2.373299 | 2.724224  | 3.966356  |
| 169 | 6 | 0 | -3.626671 | 4.423909  | -2.171238 |
| 170 | 6 | 0 | -3.663690 | 2.569377  | -4.383694 |
| 171 | 6 | 0 | -3.627342 | -2.170749 | -4.422823 |
| 172 | 6 | 0 | -3.664291 | -4.384408 | -2.569690 |
| 173 | 6 | 0 | -3.663422 | 4.384369  | 2.569747  |
| 174 | 6 | 0 | -3.626716 | 2.170546  | 4.422695  |
| 175 | 6 | 0 | -3.627417 | -4.423218 | 2.170770  |
| 176 | 6 | 0 | -3.664286 | -2.569666 | 4.384063  |
| 177 | 1 | 0 | -3.621761 | 5.176164  | -1.391130 |

|     |    |   |            |           |           |
|-----|----|---|------------|-----------|-----------|
| 178 | 1  | 0 | -3.679855  | 1.920492  | -5.251734 |
| 179 | 1  | 0 | -3.679514  | 5.252798  | 1.921370  |
| 180 | 1  | 0 | -3.622408  | -1.390274 | -5.174698 |
| 181 | 1  | 0 | -3.621851  | 1.390011  | 5.174507  |
| 182 | 1  | 0 | -3.680435  | -5.252801 | -1.921267 |
| 183 | 1  | 0 | -3.622560  | -5.175199 | 1.390393  |
| 184 | 1  | 0 | -3.680360  | -1.921080 | 5.252334  |
| 185 | 7  | 0 | -1.178547  | 2.268774  | 4.298931  |
| 186 | 7  | 0 | -1.211986  | 4.321927  | 2.618907  |
| 187 | 7  | 0 | -1.212880  | -2.618703 | 4.321731  |
| 188 | 7  | 0 | -1.179257  | -4.299005 | 2.268776  |
| 189 | 7  | 0 | -1.212828  | -4.322340 | -2.618947 |
| 190 | 7  | 0 | -1.179232  | -2.268952 | -4.298780 |
| 191 | 7  | 0 | -1.212297  | 2.618423  | -4.321599 |
| 192 | 7  | 0 | -1.178495  | 4.299997  | -2.269622 |
| 193 | 1  | 0 | -9.128282  | 1.963553  | 0.085769  |
| 194 | 1  | 0 | -9.128951  | 0.086053  | -1.963304 |
| 195 | 1  | 0 | -9.128972  | -1.963080 | -0.085629 |
| 196 | 1  | 0 | -9.129182  | -0.085413 | 1.963588  |
| 197 | 6  | 0 | -9.847190  | 2.442302  | 2.663252  |
| 198 | 1  | 0 | -10.228005 | 2.128430  | 3.640085  |
| 199 | 1  | 0 | -10.257769 | 1.758320  | 1.913097  |
| 200 | 6  | 0 | -9.847813  | -2.663214 | 2.441762  |
| 201 | 1  | 0 | -10.258319 | -1.913065 | 1.757738  |
| 202 | 1  | 0 | -10.232714 | -2.443751 | 3.442456  |
| 203 | 6  | 0 | -9.847765  | -2.441447 | -2.663286 |
| 204 | 1  | 0 | -10.258217 | -1.757464 | -1.913069 |
| 205 | 1  | 0 | -10.232709 | -3.442139 | -2.443890 |
| 206 | 6  | 0 | -9.847184  | 2.663986  | -2.441594 |
| 207 | 1  | 0 | -10.257778 | 1.913944  | -1.757504 |
| 208 | 1  | 0 | -10.232173 | 2.444541  | -3.442257 |
| 209 | 52 | 0 | 0.360041   | 3.487148  | -3.333858 |
| 210 | 52 | 0 | 0.359562   | -3.333538 | -3.486749 |
| 211 | 52 | 0 | 0.360299   | 3.333606  | 3.487280  |
| 212 | 52 | 0 | 0.359527   | -3.486839 | 3.333398  |
| 213 | 1  | 0 | -10.227710 | 3.640911  | -2.127667 |
| 214 | 1  | 0 | -10.228474 | -2.127402 | -3.640099 |
| 215 | 1  | 0 | -10.228511 | -3.640059 | 2.127806  |
| 216 | 1  | 0 | -10.231892 | 3.443057  | 2.443749  |

-----  
-----  
**RBr-RBr@A<sub>Se</sub>+A<sub>Se</sub>**  
-----

| Atom | Atomic Type | Coordinates (Angstroms) |          |           |           |
|------|-------------|-------------------------|----------|-----------|-----------|
|      |             | X                       | Y        | Z         |           |
| 1    | 6           | 0                       | 8.359849 | -1.372136 | -3.367994 |
| 2    | 6           | 0                       | 7.754229 | -2.309450 | -2.323631 |
| 3    | 6           | 0                       | 7.780739 | 0.033987  | -3.217241 |
| 4    | 1           | 0                       | 8.035990 | -1.741123 | -4.344829 |
| 5    | 6           | 0                       | 8.270059 | -2.401246 | -1.019985 |
| 6    | 6           | 0                       | 6.657112 | -3.129301 | -2.632810 |
| 7    | 6           | 0                       | 8.355510 | 1.028960  | -2.407833 |
| 8    | 6           | 0                       | 6.616618 | 0.375603  | -3.922947 |
| 9    | 6           | 0                       | 7.749973 | -3.268084 | -0.045639 |



|    |   |   |          |           |           |     |    |   |           |           |           |
|----|---|---|----------|-----------|-----------|-----|----|---|-----------|-----------|-----------|
| 10 | 6 | 0 | 6.102188 | -3.998100 | -1.693546 | 66  | 6  | 0 | 3.719771  | 3.244152  | 3.854616  |
| 11 | 8 | 0 | 6.129529 | -3.136400 | -3.951860 | 67  | 6  | 0 | 3.711360  | 3.956036  | -3.073692 |
| 12 | 6 | 0 | 7.806066 | 2.316900  | -2.282324 | 68  | 6  | 0 | 3.774289  | 5.244568  | -0.483837 |
| 13 | 6 | 0 | 6.055433 | 1.648782  | -3.853300 | 69  | 1  | 0 | 3.670237  | -3.494786 | 4.073035  |
| 14 | 8 | 0 | 6.070216 | -0.580284 | -4.808446 | 70  | 1  | 0 | 3.725029  | -5.700969 | -0.475377 |
| 15 | 6 | 0 | 8.357066 | -3.372445 | 1.351558  | 71  | 1  | 0 | 3.658234  | -0.487310 | 5.222116  |
| 16 | 6 | 0 | 6.640852 | -4.049979 | -0.409324 | 72  | 1  | 0 | 3.746812  | -4.333828 | -3.677538 |
| 17 | 1 | 0 | 5.289058 | -4.658832 | -1.970081 | 73  | 1  | 0 | 3.734824  | 4.282286  | 3.547359  |
| 18 | 6 | 0 | 4.863461 | -2.559168 | -4.114601 | 74  | 1  | 0 | 3.619426  | 0.536620  | -5.036283 |
| 19 | 6 | 0 | 8.405612 | 3.398555  | -1.386750 | 75  | 1  | 0 | 3.687919  | 3.544975  | -4.075065 |
| 20 | 6 | 0 | 6.642714 | 2.595782  | -3.016938 | 76  | 1  | 0 | 3.804996  | 5.773524  | 0.460668  |
| 21 | 1 | 0 | 5.212672 | 1.916078  | -4.477196 | 77  | 7  | 0 | 1.262737  | 3.127321  | 3.848462  |
| 22 | 6 | 0 | 4.832940 | -1.157822 | -4.522269 | 78  | 7  | 0 | 1.235755  | 0.648532  | 4.685985  |
| 23 | 1 | 0 | 8.034214 | -4.332194 | 1.763486  | 79  | 7  | 0 | 1.319967  | 5.371600  | -0.642072 |
| 24 | 6 | 0 | 7.771914 | -2.288121 | 2.251520  | 80  | 7  | 0 | 1.267640  | 4.184107  | -2.974463 |
| 25 | 8 | 0 | 6.115004 | -4.992672 | 0.508002  | 81  | 7  | 0 | 1.223639  | -0.626978 | -4.477725 |
| 26 | 6 | 0 | 7.799506 | 3.299045  | 0.012253  | 82  | 7  | 0 | 1.265252  | -3.161763 | -3.825701 |
| 27 | 1 | 0 | 8.089317 | 4.360404  | -1.799094 | 83  | 7  | 0 | 1.256079  | -5.340942 | 0.687793  |
| 28 | 8 | 0 | 6.127901 | 3.910778  | -2.991453 | 84  | 7  | 0 | 1.241645  | -4.146560 | 3.017890  |
| 29 | 6 | 0 | 8.325663 | -1.002407 | 2.369279  | 85  | 1  | 0 | 9.223341  | -0.768466 | 1.804385  |
| 30 | 6 | 0 | 6.618170 | -2.564814 | 3.001102  | 86  | 1  | 0 | 9.121371  | -1.779897 | -0.756481 |
| 31 | 6 | 0 | 4.856270 | -4.754050 | 1.076383  | 87  | 1  | 0 | 9.265062  | 0.796173  | -1.861847 |
| 32 | 6 | 0 | 2.452497 | -2.608276 | -4.057194 | 88  | 1  | 0 | 9.168317  | 1.810441  | 0.730990  |
| 33 | 6 | 0 | 8.312509 | 2.428376  | 0.988250  | 89  | 6  | 0 | 9.906599  | 1.378802  | 3.314386  |
| 34 | 6 | 0 | 6.691810 | 4.083044  | 0.372698  | 90  | 1  | 0 | 10.289278 | 2.392059  | 3.470751  |
| 35 | 6 | 0 | 4.884344 | 4.175624  | -2.410891 | 91  | 1  | 0 | 10.318298 | 1.012869  | 2.367913  |
| 36 | 6 | 0 | 2.427897 | -1.181810 | -4.420686 | 92  | 6  | 0 | 9.943293  | 3.365823  | -1.364225 |
| 37 | 6 | 0 | 7.772755 | -0.010525 | 3.197202  | 93  | 1  | 0 | 10.346380 | 2.433503  | -0.955044 |
| 38 | 6 | 0 | 6.050113 | -1.620213 | 3.852652  | 94  | 1  | 0 | 10.324695 | 4.187043  | -0.749755 |
| 39 | 8 | 0 | 6.094748 | -3.876275 | 2.967607  | 95  | 6  | 0 | 9.898271  | -1.382448 | -3.337101 |
| 40 | 6 | 0 | 4.845001 | -4.125501 | 2.394100  | 96  | 1  | 0 | 10.309957 | -1.034131 | -2.384058 |
| 41 | 6 | 0 | 7.779197 | 2.325751  | 2.283467  | 97  | 1  | 0 | 10.292892 | -0.734123 | -4.125725 |
| 42 | 6 | 0 | 6.134186 | 4.018553  | 1.648524  | 98  | 6  | 0 | 9.895226  | -3.353352 | 1.324429  |
| 43 | 8 | 0 | 6.180616 | 5.037399  | -0.542403 | 99  | 1  | 0 | 10.305339 | -2.422147 | 0.919711  |
| 44 | 6 | 0 | 4.914646 | 4.814134  | -1.099256 | 100 | 1  | 0 | 10.268206 | -4.174763 | 0.704945  |
| 45 | 6 | 0 | 8.367969 | 1.389299  | 3.337647  | 101 | 1  | 0 | 10.335224 | 3.478962  | -2.379893 |
| 46 | 6 | 0 | 6.623102 | -0.351829 | 3.926412  | 102 | 1  | 0 | 10.267744 | -2.398873 | -3.503793 |
| 47 | 1 | 0 | 5.211286 | -1.882809 | 4.484038  | 103 | 1  | 0 | 10.288329 | 0.734625  | 4.112638  |
| 48 | 6 | 0 | 2.449540 | -4.965330 | 1.147293  | 104 | 1  | 0 | 10.288161 | -3.475003 | 2.338661  |
| 49 | 6 | 0 | 6.671720 | 3.135767  | 2.583731  | 105 | 34 | 0 | -0.018169 | 4.891430  | -1.838838 |
| 50 | 1 | 0 | 5.320009 | 4.678662  | 1.922512  | 106 | 34 | 0 | -0.076788 | 1.892888  | 4.249190  |
| 51 | 6 | 0 | 2.479078 | 4.355497  | -2.446699 | 107 | 34 | 0 | -0.082964 | -1.896341 | -4.087457 |
| 52 | 1 | 0 | 8.043971 | 1.770517  | 4.309736  | 108 | 34 | 0 | -0.061103 | -4.869133 | 1.912731  |
| 53 | 8 | 0 | 6.094065 | 0.592705  | 4.835153  | 109 | 6  | 0 | -8.366655 | -1.390183 | 3.336978  |
| 54 | 6 | 0 | 2.439848 | -4.300393 | 2.459740  | 110 | 6  | 0 | -7.777477 | -2.326519 | 2.282806  |
| 55 | 8 | 0 | 6.132905 | 3.123485  | 3.894347  | 111 | 6  | 0 | -7.771647 | 0.009732  | 3.196702  |
| 56 | 6 | 0 | 2.508882 | 5.022506  | -1.136362 | 112 | 1  | 0 | -8.042758 | -1.771418 | 4.309102  |
| 57 | 6 | 0 | 4.849630 | 1.168677  | 4.561663  | 113 | 6  | 0 | -8.310495 | -2.429146 | 0.987467  |
| 58 | 6 | 0 | 4.869820 | 2.543213  | 4.072972  | 114 | 6  | 0 | -6.670068 | -3.136562 | 2.583261  |
| 59 | 6 | 0 | 2.440367 | 1.189960  | 4.538758  | 115 | 6  | 0 | -8.324421 | 1.001514  | 2.368516  |
| 60 | 6 | 0 | 2.457216 | 2.582982  | 4.065697  | 116 | 6  | 0 | -6.621741 | 0.350914  | 3.925518  |
| 61 | 6 | 0 | 3.680950 | -3.902613 | 3.070200  | 117 | 6  | 0 | -7.797181 | -3.299540 | 0.011369  |
| 62 | 6 | 0 | 3.706103 | -5.174694 | 0.471224  | 118 | 6  | 0 | -6.132336 | -4.019221 | 1.648054  |
| 63 | 6 | 0 | 3.720620 | -3.279755 | -3.923924 | 119 | 8  | 0 | -6.131181 | -3.124253 | 3.893822  |
| 64 | 6 | 0 | 3.658245 | -0.486552 | -4.686237 | 120 | 6  | 0 | -7.770072 | 2.286894  | 2.249887  |
| 65 | 6 | 0 | 3.680260 | 0.511484  | 4.805715  | 121 | 6  | 0 | -6.048236 | 1.619051  | 3.851034  |

|     |   |   |           |           |           |     |    |   |            |           |           |
|-----|---|---|-----------|-----------|-----------|-----|----|---|------------|-----------|-----------|
| 122 | 8 | 0 | -6.092614 | -0.593535 | 4.834136  | 178 | 1  | 0 | -3.801326  | -5.771001 | 0.460638  |
| 123 | 6 | 0 | -8.402898 | -3.398880 | -1.387847 | 179 | 1  | 0 | -3.615458  | -0.536955 | -5.034451 |
| 124 | 6 | 0 | -6.689393 | -4.083348 | 0.371951  | 180 | 1  | 0 | -3.732838  | -4.282722 | 3.546644  |
| 125 | 1 | 0 | -5.318167 | -4.679318 | 1.922079  | 181 | 1  | 0 | -3.742707  | 4.333243  | -3.675109 |
| 126 | 6 | 0 | -4.868092 | -2.543747 | 4.072054  | 182 | 1  | 0 | -3.656800  | 0.487165  | 5.220546  |
| 127 | 6 | 0 | -8.354968 | 3.371613  | 1.350275  | 183 | 1  | 0 | -3.668698  | 3.493855  | 4.071882  |
| 128 | 6 | 0 | -6.616045 | 2.563486  | 2.999136  | 184 | 1  | 0 | -3.722908  | 5.703096  | -0.475104 |
| 129 | 1 | 0 | -5.209183 | 1.881640  | 4.482104  | 185 | 7  | 0 | -1.261635  | 3.160703  | -3.821485 |
| 130 | 6 | 0 | -4.848037 | -1.169127 | 4.560448  | 186 | 7  | 0 | -1.219567  | 0.626642  | -4.476031 |
| 131 | 1 | 0 | -8.086454 | -4.360693 | -1.800157 | 187 | 7  | 0 | -1.254074  | 5.342817  | 0.688424  |
| 132 | 6 | 0 | -7.803242 | -2.317182 | -2.283331 | 188 | 7  | 0 | -1.240003  | 4.146740  | 3.017759  |
| 133 | 8 | 0 | -6.177347 | -5.037170 | -0.543201 | 189 | 7  | 0 | -1.234196  | -0.648610 | 4.684966  |
| 134 | 6 | 0 | -7.747406 | 3.268144  | -0.046762 | 190 | 7  | 0 | -1.260971  | -3.127546 | 3.847995  |
| 135 | 1 | 0 | -8.032347 | 4.331151  | 1.762888  | 191 | 7  | 0 | -1.316567  | -5.368972 | -0.642372 |
| 136 | 8 | 0 | -6.092942 | 3.875001  | 2.965743  | 192 | 7  | 0 | -1.264540  | -4.183146 | -2.975630 |
| 137 | 6 | 0 | -8.352431 | -1.029119 | -2.408709 | 193 | 1  | 0 | -9.261898  | -0.796190 | -1.862604 |
| 138 | 6 | 0 | -6.639931 | -2.596213 | -3.018031 | 194 | 1  | 0 | -9.166228  | -1.811165 | 0.730037  |
| 139 | 6 | 0 | -4.911407 | -4.813130 | -1.099906 | 195 | 1  | 0 | -9.222340  | 0.767593  | 1.804002  |
| 140 | 6 | 0 | -2.455516 | -2.583087 | 4.064558  | 196 | 1  | 0 | -9.118078  | 1.779436  | -0.757989 |
| 141 | 6 | 0 | -8.267081 | 2.401301  | -1.021337 | 197 | 6  | 0 | -9.894688  | 1.382479  | -3.338791 |
| 142 | 6 | 0 | -6.638853 | 4.050960  | -0.410319 | 198 | 1  | 0 | -10.289060 | 0.734241  | -4.127607 |
| 143 | 6 | 0 | -4.843128 | 4.125243  | 2.392976  | 199 | 6  | 0 | -9.893126  | 3.352478  | 1.322565  |
| 144 | 6 | 0 | -2.438795 | -1.189971 | 4.537228  | 200 | 1  | 0 | -10.303047 | 2.421479  | 0.917188  |
| 145 | 6 | 0 | -7.777308 | -0.034071 | -3.217857 | 201 | 1  | 0 | -10.265914 | 4.174213  | 0.703398  |
| 146 | 6 | 0 | -6.052450 | -1.649229 | -3.854206 | 202 | 6  | 0 | -9.905272  | -1.380000 | 3.313365  |
| 147 | 8 | 0 | -6.125072 | -3.911156 | -2.992399 | 203 | 1  | 0 | -10.316842 | -1.014104 | 2.366820  |
| 148 | 6 | 0 | -4.881320 | -4.175443 | -2.411954 | 204 | 1  | 0 | -10.287333 | -0.735968 | 4.111579  |
| 149 | 6 | 0 | -7.751144 | 2.309911  | -2.324942 | 205 | 6  | 0 | -9.940593  | -3.366191 | -1.365701 |
| 150 | 6 | 0 | -6.100437 | 3.999824  | -1.694695 | 206 | 1  | 0 | -10.343782 | -2.433834 | -0.956700 |
| 151 | 8 | 0 | -6.113035 | 4.993393  | 0.507250  | 207 | 1  | 0 | -10.322145 | -4.187361 | -0.751260 |
| 152 | 6 | 0 | -4.854300 | 4.754743  | 1.075673  | 208 | 34 | 0 | 0.021442   | -4.889445 | -1.839524 |
| 153 | 6 | 0 | -8.356240 | 1.372099  | -3.369129 | 209 | 34 | 0 | 0.078429   | -1.893164 | 4.249017  |
| 154 | 6 | 0 | -6.613220 | -0.375850 | -3.923426 | 210 | 34 | 0 | 0.086883   | 1.895960  | -4.084836 |
| 155 | 1 | 0 | -5.209700 | -1.916505 | -4.478133 | 211 | 34 | 0 | 0.062914   | 4.869817  | 1.913169  |
| 156 | 6 | 0 | -2.505521 | -5.020433 | -1.136855 | 212 | 1  | 0 | -10.286443 | 3.473572  | 2.336714  |
| 157 | 6 | 0 | -6.654561 | 3.130537  | -2.633960 | 213 | 1  | 0 | -10.306734 | 1.034058  | -2.385939 |
| 158 | 1 | 0 | -5.287656 | 4.661038  | -1.971121 | 214 | 1  | 0 | -10.287767 | -2.393351 | 3.469559  |
| 159 | 6 | 0 | -2.438072 | 4.300977  | 2.459505  | 215 | 1  | 0 | -10.332276 | -3.479409 | -2.381455 |
| 160 | 1 | 0 | -8.032054 | 1.740708  | -4.346003 | 216 | 1  | 0 | -10.264051 | 2.398940  | -3.505525 |
| 161 | 8 | 0 | -6.065994 | 0.580193  | -4.808240 | 217 | 6  | 0 | -5.519445  | -0.171768 | 0.136406  |
| 162 | 6 | 0 | -2.475925 | -4.354395 | -2.447705 | 218 | 6  | 0 | -4.374321  | 0.281405  | -0.785890 |
| 163 | 8 | 0 | -6.125625 | 3.136728  | -3.952391 | 219 | 1  | 0 | -6.429568  | -0.388753 | -0.437150 |
| 164 | 6 | 0 | -2.447588 | 4.966859  | 1.147499  | 220 | 1  | 0 | -5.246742  | -1.079966 | 0.692918  |
| 165 | 6 | 0 | -4.828948 | 1.157515  | -4.520575 | 221 | 1  | 0 | -5.763386  | 0.612499  | 0.867359  |
| 166 | 6 | 0 | -4.859546 | 2.558896  | -4.113073 | 222 | 6  | 0 | -3.122115  | 0.682149  | 0.022132  |
| 167 | 6 | 0 | -2.423885 | 1.181275  | -4.418377 | 223 | 1  | 0 | -4.123981  | -0.522859 | -1.494178 |
| 168 | 6 | 0 | -2.448649 | 2.607338  | -4.053819 | 224 | 1  | 0 | -4.710423  | 1.140880  | -1.388527 |
| 169 | 6 | 0 | -3.708421 | -3.955762 | -3.074896 | 225 | 1  | 0 | -3.377955  | 1.510745  | 0.698093  |
| 170 | 6 | 0 | -3.770855 | -5.242564 | -0.484167 | 226 | 1  | 0 | -2.793171  | -0.158092 | 0.647084  |
| 171 | 6 | 0 | -3.717959 | -3.244504 | 3.853621  | 227 | 6  | 0 | -1.987500  | 1.104966  | -0.904212 |
| 172 | 6 | 0 | -3.678765 | -0.511592 | 4.804057  | 228 | 1  | 0 | -2.268970  | 1.945952  | -1.542870 |
| 173 | 6 | 0 | -3.654235 | 0.486116  | -4.684083 | 229 | 1  | 0 | -1.593949  | 0.274454  | -1.497559 |
| 174 | 6 | 0 | -3.716670 | 3.279101  | -3.921249 | 230 | 35 | 0 | -0.408316  | 1.792544  | 0.158849  |
| 175 | 6 | 0 | -3.679233 | 3.902406  | 3.069338  | 231 | 6  | 0 | 1.953780   | -1.083216 | -0.904790 |
| 176 | 6 | 0 | -3.704073 | 5.176185  | 0.471156  | 232 | 1  | 0 | 2.221510   | -1.907859 | -1.570072 |
| 177 | 1 | 0 | -3.685141 | -3.545350 | -4.076544 | 233 | 1  | 0 | 1.557295   | -0.234345 | -1.469316 |

|     |    |   |          |           |           |
|-----|----|---|----------|-----------|-----------|
| 234 | 6  | 0 | 3.103118 | -0.693109 | 0.017924  |
| 235 | 6  | 0 | 4.346171 | -0.273129 | -0.794438 |
| 236 | 1  | 0 | 3.364189 | -1.542567 | 0.665413  |
| 237 | 1  | 0 | 2.786530 | 0.129467  | 0.672070  |
| 238 | 6  | 0 | 5.508068 | 0.140398  | 0.125776  |
| 239 | 1  | 0 | 4.667367 | -1.113739 | -1.430845 |
| 240 | 1  | 0 | 4.090847 | 0.556503  | -1.470896 |
| 241 | 1  | 0 | 6.407775 | 0.383743  | -0.453873 |
| 242 | 1  | 0 | 5.244927 | 1.022484  | 0.727055  |
| 243 | 1  | 0 | 5.765905 | -0.675726 | 0.816020  |
| 244 | 35 | 0 | 0.384498 | -1.790038 | 0.160209  |

|    |   |   |            |           |           |
|----|---|---|------------|-----------|-----------|
| 38 | 6 | 0 | -6.045770  | 1.203819  | 3.958941  |
| 39 | 8 | 0 | -6.091290  | 3.537980  | 3.300001  |
| 40 | 6 | 0 | -4.844257  | 3.854626  | 2.757418  |
| 41 | 6 | 0 | -7.787966  | -2.557836 | 2.028452  |
| 42 | 6 | 0 | -6.140774  | -4.175569 | 1.225734  |
| 43 | 8 | 0 | -6.166679  | -4.954427 | -1.060335 |
| 44 | 6 | 0 | -4.896356  | -4.669175 | -1.578661 |
| 45 | 6 | 0 | -8.382146  | -1.730317 | 3.168325  |
| 46 | 6 | 0 | -6.627207  | -0.062180 | 3.910743  |
| 47 | 1 | 0 | -5.199240  | 1.397003  | 4.604437  |
| 48 | 6 | 0 | -2.459700  | 4.887370  | 1.635965  |
| 49 | 6 | 0 | -6.683914  | -3.398402 | 2.247514  |
| 50 | 1 | 0 | -5.327444  | -4.860909 | 1.432701  |
| 51 | 6 | 0 | -2.452154  | -4.047617 | -2.840624 |
| 52 | 1 | 0 | -8.059761  | -2.204811 | 4.099104  |
| 53 | 8 | 0 | -6.097299  | -1.097283 | 4.712447  |
| 54 | 6 | 0 | -2.440043  | 4.026038  | 2.829282  |
| 55 | 8 | 0 | -6.147945  | -3.530758 | 3.553333  |
| 56 | 6 | 0 | -2.489590  | -4.872275 | -1.623356 |
| 57 | 6 | 0 | -4.854882  | -1.648639 | 4.387737  |
| 58 | 6 | 0 | -4.881221  | -2.978767 | 3.789853  |
| 59 | 6 | 0 | -2.446363  | -1.687849 | 4.376484  |
| 60 | 6 | 0 | -2.468135  | -3.041546 | 3.801374  |
| 61 | 6 | 0 | -3.674891  | 3.537699  | 3.384054  |
| 62 | 6 | 0 | -3.722313  | 5.182275  | 1.002817  |
| 63 | 6 | 0 | -3.705838  | 3.718867  | -3.587820 |
| 64 | 6 | 0 | -3.629429  | 1.005500  | -4.595809 |
| 65 | 6 | 0 | -3.681991  | -1.020728 | 4.686034  |
| 66 | 6 | 0 | -3.734886  | -3.671022 | 3.525620  |
| 67 | 6 | 0 | -3.679938  | -3.576886 | -3.424862 |
| 68 | 6 | 0 | -3.759929  | -5.169961 | -1.010536 |
| 69 | 1 | 0 | -3.652559  | 2.988726  | 4.316880  |
| 70 | 1 | 0 | -3.751355  | 5.836670  | 0.140070  |
| 71 | 1 | 0 | -3.652558  | -0.059236 | 5.181957  |
| 72 | 1 | 0 | -3.738867  | 4.745865  | -3.246042 |
| 73 | 1 | 0 | -3.757546  | -4.681205 | 3.136317  |
| 74 | 1 | 0 | -3.584703  | 0.018213  | -5.036689 |
| 75 | 1 | 0 | -3.647786  | -3.049275 | -4.369724 |
| 76 | 1 | 0 | -3.797531  | -5.807684 | -0.136015 |
| 77 | 7 | 0 | -1.273553  | -3.580869 | 3.562480  |
| 78 | 7 | 0 | -1.239486  | -1.168614 | 4.579837  |
| 79 | 7 | 0 | -1.303416  | -5.285850 | -1.172978 |
| 80 | 7 | 0 | -1.238896  | -3.813935 | -3.338685 |
| 81 | 7 | 0 | -1.196594  | 1.141004  | -4.385792 |
| 82 | 7 | 0 | -1.247276  | 3.607863  | -3.508265 |
| 83 | 7 | 0 | -1.270947  | 5.335112  | 1.232645  |
| 84 | 7 | 0 | -1.239537  | 3.787808  | 3.348579  |
| 85 | 1 | 0 | -9.255907  | 0.582931  | 1.882155  |
| 86 | 1 | 0 | -9.085491  | 1.838172  | -0.581293 |
| 87 | 1 | 0 | -9.257330  | -0.587438 | -1.954376 |
| 88 | 1 | 0 | -9.163580  | -1.876200 | 0.529656  |
| 89 | 6 | 0 | -9.920515  | -1.720972 | 3.140871  |
| 90 | 1 | 0 | -10.301141 | -2.745433 | 3.196288  |
| 91 | 1 | 0 | -10.329782 | -1.265751 | 2.232873  |
| 92 | 6 | 0 | -9.927682  | -3.196580 | -1.724997 |
| 93 | 1 | 0 | -10.334089 | -2.314658 | -1.218879 |

RBr-RI@A<sub>Se</sub>+A<sub>Se</sub>

| Atom | Atomic Type | Coordinates (Angstroms) |           |           |           |
|------|-------------|-------------------------|-----------|-----------|-----------|
|      |             | X                       | Y         | Z         |           |
| 1    | 6           | 0                       | -8.338801 | 1.727262  | -3.219434 |
| 2    | 6           | 0                       | -7.734189 | 2.553968  | -2.085455 |
| 3    | 6           | 0                       | -7.760699 | 0.313350  | -3.207788 |
| 4    | 1           | 0                       | -8.013346 | 2.192286  | -4.153747 |
| 5    | 6           | 0                       | -8.246128 | 2.499205  | -0.778677 |
| 6    | 6           | 0                       | -6.646768 | 3.414321  | -2.307191 |
| 7    | 6           | 0                       | -8.340860 | -0.760740 | -2.511068 |
| 8    | 6           | 0                       | -6.588879 | 0.050420  | -3.933781 |
| 9    | 6           | 0                       | -7.740558 | 3.268777  | 0.281456  |
| 10   | 6           | 0                       | -6.103559 | 4.187283  | -1.281260 |
| 11   | 8           | 0                       | -6.114503 | 3.563270  | -3.616195 |
| 12   | 6           | 0                       | -7.786892 | -2.053152 | -2.512474 |
| 13   | 6           | 0                       | -6.024769 | -1.221702 | -3.992290 |
| 14   | 8           | 0                       | -6.042186 | 1.096890  | -4.708856 |
| 15   | 6           | 0                       | -8.360774 | 3.217216  | 1.676528  |
| 16   | 6           | 0                       | -6.644242 | 4.102136  | 0.001108  |
| 17   | 1           | 0                       | -5.296982 | 4.881757  | -1.486293 |
| 18   | 6           | 0                       | -4.845525 | 3.009537  | -3.834858 |
| 19   | 6           | 0                       | -8.389853 | -3.226283 | -1.741772 |
| 20   | 6           | 0                       | -6.616041 | -2.250381 | -3.261418 |
| 21   | 1           | 0                       | -5.176629 | -1.421989 | -4.633573 |
| 22   | 6           | 0                       | -4.808318 | 1.650371  | -4.367286 |
| 23   | 1           | 0                       | -8.042715 | 4.125605  | 2.194965  |
| 24   | 6           | 0                       | -7.783568 | 2.039564  | 2.456474  |
| 25   | 8           | 0                       | -6.127855 | 4.957416  | 1.006712  |
| 26   | 6           | 0                       | -7.793150 | -3.282541 | -0.335872 |
| 27   | 1           | 0                       | -8.070519 | -4.137284 | -2.255104 |
| 28   | 8           | 0                       | -6.097582 | -3.559546 | -3.363258 |
| 29   | 6           | 0                       | -8.348242 | 0.752850  | 2.454021  |
| 30   | 6           | 0                       | -6.616851 | 2.231600  | 3.212621  |
| 31   | 6           | 0                       | -4.865353 | 4.664961  | 1.542804  |
| 32   | 6           | 0                       | -2.432853 | 3.071648  | -3.787059 |
| 33   | 6           | 0                       | -8.312295 | -2.522395 | 0.725762  |
| 34   | 6           | 0                       | -6.688106 | -4.102248 | -0.054007 |
| 35   | 6           | 0                       | -4.857580 | -3.880093 | -2.805268 |
| 36   | 6           | 0                       | -2.402488 | 1.683932  | -4.276983 |
| 37   | 6           | 0                       | -7.788778 | -0.322009 | 3.167041  |

|     |    |   |            |           |           |     |   |   |           |           |           |
|-----|----|---|------------|-----------|-----------|-----|---|---|-----------|-----------|-----------|
| 94  | 1  | 0 | -10.311979 | -4.080095 | -1.206232 | 150 | 6 | 0 | 6.114606  | -3.781809 | -2.080336 |
| 95  | 6  | 0 | -9.877219  | 1.737095  | -3.189274 | 151 | 8 | 0 | 6.129722  | -4.998278 | 0.007679  |
| 96  | 1  | 0 | -10.290575 | 1.297660  | -2.275423 | 152 | 6 | 0 | 4.870857  | -4.835806 | 0.600571  |
| 97  | 1  | 0 | -10.272060 | 1.170279  | -4.038310 | 153 | 6 | 0 | 8.376313  | -1.001285 | -3.478706 |
| 98  | 6  | 0 | -9.898517  | 3.203158  | 1.631252  | 154 | 6 | 0 | 6.637655  | 0.798303  | -3.855245 |
| 99  | 1  | 0 | -10.304555 | 2.324260  | 1.119631  | 155 | 1 | 0 | 5.234973  | 2.388931  | -4.247661 |
| 100 | 1  | 0 | -10.264648 | 4.089631  | 1.104375  | 156 | 6 | 0 | 2.535643  | 5.196022  | -0.644043 |
| 101 | 34 | 0 | 0.040235   | -4.662554 | -2.297159 | 157 | 6 | 0 | 6.670068  | -2.820363 | -2.924514 |
| 102 | 34 | 0 | 0.067305   | -2.390075 | 4.075852  | 158 | 1 | 0 | 5.301812  | -4.410265 | -2.424439 |
| 103 | 34 | 0 | 0.104495   | 2.375156  | -3.884019 | 159 | 6 | 0 | 2.456958  | -4.593693 | 2.045102  |
| 104 | 34 | 0 | 0.055707   | 4.673676  | 2.358561  | 160 | 1 | 0 | 8.051778  | -1.270021 | -4.487589 |
| 105 | 1  | 0 | -10.313638 | -3.198177 | -2.749226 | 161 | 8 | 0 | 6.087730  | -0.060398 | -4.833544 |
| 106 | 1  | 0 | -10.244648 | 2.765671  | -3.255396 | 162 | 6 | 0 | 2.507659  | 4.656391  | -2.011130 |
| 107 | 1  | 0 | -10.306842 | -1.158370 | 3.996540  | 163 | 8 | 0 | 6.138874  | -2.687844 | -4.234910 |
| 108 | 1  | 0 | -10.302315 | 3.210504  | 2.648537  | 164 | 6 | 0 | 2.468505  | -5.097175 | 0.661862  |
| 109 | 6  | 0 | 8.356176   | 1.056727  | 3.468550  | 165 | 6 | 0 | 4.848425  | -0.658661 | -4.602222 |
| 110 | 6  | 0 | 7.774192   | 2.094803  | 2.509611  | 166 | 6 | 0 | 4.874466  | -2.092054 | -4.329361 |
| 111 | 6  | 0 | 7.765934   | -0.323989 | 3.187920  | 167 | 6 | 0 | 2.443977  | -0.681758 | -4.488993 |
| 112 | 1  | 0 | 8.025077   | 1.339389  | 4.471491  | 168 | 6 | 0 | 2.464635  | -2.134776 | -4.253530 |
| 113 | 6  | 0 | 8.318564   | 2.334431  | 1.237289  | 169 | 6 | 0 | 3.739204  | 4.297757  | -2.663372 |
| 114 | 6  | 0 | 6.662873   | 2.867972  | 2.883393  | 170 | 6 | 0 | 3.797515  | 5.332088  | 0.037825  |
| 115 | 6  | 0 | 8.323096   | -1.224321 | 2.263812  | 171 | 6 | 0 | 3.696358  | 2.812776  | 4.095760  |
| 116 | 6  | 0 | 6.618299   | -0.743801 | 3.878279  | 172 | 6 | 0 | 3.666792  | 0.007815  | 4.805131  |
| 117 | 6  | 0 | 7.813585   | 3.303845  | 0.354461  | 173 | 6 | 0 | 3.676017  | 0.029755  | -4.697108 |
| 118 | 6  | 0 | 6.134340   | 3.846883  | 2.043604  | 174 | 6 | 0 | 3.729623  | -2.821670 | -4.194822 |
| 119 | 8  | 0 | 6.109228   | 2.711169  | 4.178023  | 175 | 6 | 0 | 3.696610  | -4.241352 | 2.687392  |
| 120 | 6  | 0 | 7.776665   | -2.494839 | 2.016760  | 176 | 6 | 0 | 3.722828  | -5.202394 | -0.042245 |
| 121 | 6  | 0 | 6.051281   | -2.000867 | 3.675091  | 177 | 1 | 0 | 3.718780  | 3.985354  | -3.699883 |
| 122 | 8  | 0 | 6.078832   | 0.101489  | 4.875070  | 178 | 1 | 0 | 3.827506  | 5.768417  | 1.028590  |
| 123 | 6  | 0 | 8.429231   | 3.544939  | -1.023134 | 179 | 1 | 0 | 3.640170  | 1.081300  | -4.949978 |
| 124 | 6  | 0 | 6.703577   | 4.047279  | 0.786891  | 180 | 1 | 0 | 3.704829  | 3.873703  | 3.879812  |
| 125 | 1  | 0 | 5.318054   | 4.475209  | 2.379077  | 181 | 1 | 0 | 3.751118  | -3.894248 | -4.048427 |
| 126 | 6  | 0 | 4.849148   | 2.106257  | 4.276764  | 182 | 1 | 0 | 3.647740  | -1.024406 | 5.129927  |
| 127 | 6  | 0 | 8.369238   | -3.477048 | 1.011266  | 183 | 1 | 0 | 3.688828  | -3.951488 | 3.730638  |
| 128 | 6  | 0 | 6.624104   | -2.852339 | 2.733585  | 184 | 1 | 0 | 3.741759  | -5.616593 | -1.042911 |
| 129 | 1  | 0 | 5.211931   | -2.329906 | 4.273976  | 185 | 7 | 0 | 1.276760  | -2.702715 | -4.064189 |
| 130 | 6  | 0 | 4.833492   | 0.693846  | 4.641230  | 186 | 7 | 0 | 1.242035  | -0.118978 | -4.489031 |
| 131 | 1  | 0 | 8.117952   | 4.544934  | -1.336716 | 187 | 7 | 0 | 1.279544  | -5.441781 | 0.166931  |
| 132 | 6  | 0 | 7.831213   | 2.561438  | -2.026696 | 188 | 7 | 0 | 1.260866  | -4.535351 | 2.627338  |
| 133 | 8  | 0 | 6.201786   | 5.096978  | -0.022985 | 189 | 7 | 0 | 1.223173  | 0.134481  | 4.651988  |
| 134 | 6  | 0 | 7.764055   | -3.227706 | -0.367790 | 190 | 7 | 0 | 1.243370  | 2.676272  | 4.029665  |
| 135 | 1  | 0 | 8.049627   | -4.475975 | 1.319410  | 191 | 7 | 0 | 1.346786  | 5.521503  | -0.129573 |
| 136 | 8  | 0 | 6.108330   | -4.157958 | 2.573503  | 192 | 7 | 0 | 1.297881  | 4.558378  | -2.564883 |
| 137 | 6  | 0 | 8.380086   | 1.292951  | -2.284690 | 193 | 1 | 0 | 9.291651  | 1.005534  | -1.768450 |
| 138 | 6  | 0 | 6.666744   | 2.914332  | -2.727296 | 194 | 1 | 0 | 9.176155  | 1.746197  | 0.922650  |
| 139 | 6  | 0 | 4.937408   | 4.944754  | -0.607135 | 195 | 1 | 0 | 9.218242  | -0.929021 | 1.724067  |
| 140 | 6  | 0 | 2.437706   | 2.124042  | 4.221857  | 196 | 1 | 0 | 9.138051  | -1.676252 | -0.921983 |
| 141 | 6  | 0 | 8.285514   | -2.265830 | -1.247419 | 197 | 6 | 0 | 9.914647  | -1.019262 | -3.448600 |
| 142 | 6  | 0 | 6.652943   | -3.965994 | -0.808640 | 198 | 1 | 0 | 10.311697 | -0.296762 | -4.168528 |
| 143 | 6  | 0 | 4.858667   | -4.361685 | 1.981956  | 199 | 6 | 0 | 9.907341  | -3.449781 | 0.991331  |
| 144 | 6  | 0 | 2.424991   | 0.695678  | 4.573869  | 200 | 1 | 0 | 10.315473 | -2.479982 | 0.688179  |
| 145 | 6  | 0 | 7.801549   | 0.384824  | -3.188765 | 201 | 1 | 0 | 10.285126 | -4.200403 | 0.290303  |
| 146 | 6  | 0 | 6.078296   | 2.058509  | -3.655599 | 202 | 6 | 0 | 9.895075  | 1.050162  | 3.454923  |
| 147 | 8  | 0 | 6.155598   | 4.220972  | -2.569392 | 203 | 1 | 0 | 10.313401 | 0.779095  | 2.479885  |
| 148 | 6  | 0 | 4.909801   | 4.436743  | -1.974135 | 204 | 1 | 0 | 10.272547 | 0.331132  | 4.188644  |
| 149 | 6  | 0 | 7.768500   | -2.038264 | -2.533989 | 205 | 6 | 0 | 9.966570  | 3.505520  | -0.995445 |

|     |    |   |           |           |           |    |   |   |           |           |           |
|-----|----|---|-----------|-----------|-----------|----|---|---|-----------|-----------|-----------|
| 206 | 1  | 0 | 10.365357 | 2.535694  | -0.680050 | 10 | 6 | 0 | -6.101448 | 4.099134  | -1.464584 |
| 207 | 1  | 0 | 10.346223 | 4.259564  | -0.299245 | 11 | 8 | 0 | -6.109309 | 3.361837  | -3.766020 |
| 208 | 34 | 0 | 0.016656  | 5.180845  | -1.378651 | 12 | 6 | 0 | -7.794926 | -2.192374 | -2.409866 |
| 209 | 34 | 0 | -0.093020 | 1.403431  | 4.299826  | 13 | 6 | 0 | -6.031848 | -1.434740 | -3.927849 |
| 210 | 34 | 0 | -0.067437 | -1.414180 | -4.206852 | 14 | 8 | 0 | -6.039133 | 0.849170  | -4.746906 |
| 211 | 34 | 0 | -0.035230 | -5.146652 | 1.448092  | 15 | 6 | 0 | -8.368548 | 3.279149  | 1.530465  |
| 212 | 1  | 0 | 10.297634 | -3.675912 | 1.988506  | 16 | 6 | 0 | -6.648199 | 4.080544  | -0.182122 |
| 213 | 1  | 0 | 10.326555 | -0.768766 | -2.465414 | 17 | 1 | 0 | -5.291687 | 4.779867  | -1.700727 |
| 214 | 1  | 0 | 10.275044 | 2.043623  | 3.712277  | 18 | 6 | 0 | -4.840817 | 2.797302  | -3.957142 |
| 215 | 1  | 0 | 10.364661 | 3.719352  | -1.992341 | 19 | 6 | 0 | -8.401461 | -3.325972 | -1.584108 |
| 216 | 1  | 0 | 10.281267 | -2.015155 | -3.715411 | 20 | 6 | 0 | -6.625325 | -2.427176 | -3.149974 |
| 217 | 6  | 0 | 5.601892  | 0.216210  | 0.133948  | 21 | 1 | 0 | -5.184028 | -1.666112 | -4.559193 |
| 218 | 6  | 0 | 4.435960  | -0.117504 | -0.812691 | 22 | 6 | 0 | -4.804762 | 1.415725  | -4.428057 |
| 219 | 1  | 0 | 6.530398  | 0.396245  | -0.421956 | 23 | 1 | 0 | -8.051346 | 4.211105  | 2.005809  |
| 220 | 1  | 0 | 5.386180  | 1.113354  | 0.731729  | 24 | 6 | 0 | -7.788683 | 2.139533  | 2.363175  |
| 221 | 1  | 0 | 5.787874  | -0.616028 | 0.828692  | 25 | 8 | 0 | -6.138216 | 4.988944  | 0.779603  |
| 222 | 6  | 0 | 3.180583  | -0.542703 | -0.023102 | 26 | 6 | 0 | -7.804958 | -3.316438 | -0.176907 |
| 223 | 1  | 0 | 4.208023  | 0.750498  | -1.449469 | 27 | 1 | 0 | -8.084138 | -4.261198 | -2.053276 |
| 224 | 1  | 0 | 4.733316  | -0.936645 | -1.487455 | 28 | 8 | 0 | -6.109991 | -3.740866 | -3.193075 |
| 225 | 1  | 0 | 3.417123  | -1.445964 | 0.557545  | 29 | 6 | 0 | -8.352950 | 0.853981  | 2.422008  |
| 226 | 1  | 0 | 2.907905  | 0.240112  | 0.697154  | 30 | 6 | 0 | -6.618425 | 2.366745  | 3.104367  |
| 227 | 6  | 0 | 2.001705  | -0.817746 | -0.956840 | 31 | 6 | 0 | -4.875012 | 4.737500  | 1.333404  |
| 228 | 1  | 0 | 2.250394  | -1.564698 | -1.715613 | 32 | 6 | 0 | -2.428442 | 2.861048  | -3.912175 |
| 229 | 1  | 0 | 1.609664  | 0.090426  | -1.424376 | 33 | 6 | 0 | -8.323294 | -2.508307 | 0.849252  |
| 230 | 53 | 0 | 0.316314  | -1.688121 | 0.132611  | 34 | 6 | 0 | -6.697186 | -4.119537 | 0.140243  |
| 231 | 6  | 0 | -2.237071 | 1.280261  | -0.850658 | 35 | 6 | 0 | -4.870353 | -4.040991 | -2.622623 |
| 232 | 1  | 0 | -2.579578 | 2.148383  | -1.418347 | 36 | 6 | 0 | -2.398698 | 1.453107  | -4.340964 |
| 233 | 1  | 0 | -1.829854 | 0.512241  | -1.514712 | 37 | 6 | 0 | -7.790661 | -0.187327 | 3.181390  |
| 234 | 6  | 0 | -3.322864 | 0.747090  | 0.074590  | 38 | 6 | 0 | -6.044726 | 1.374614  | 3.895191  |
| 235 | 6  | 0 | -4.579199 | 0.355865  | -0.729456 | 39 | 8 | 0 | -6.096605 | 3.677289  | 3.133189  |
| 236 | 1  | 0 | -3.591619 | 1.515890  | 0.813868  | 40 | 6 | 0 | -4.850032 | 3.983607  | 2.584751  |
| 237 | 1  | 0 | -2.945244 | -0.120627 | 0.631220  | 41 | 6 | 0 | -7.793440 | -2.477949 | 2.150089  |
| 238 | 6  | 0 | -5.674176 | -0.208047 | 0.189162  | 42 | 6 | 0 | -6.145302 | -4.129493 | 1.420081  |
| 239 | 1  | 0 | -4.965777 | 1.243646  | -1.256184 | 43 | 8 | 0 | -6.180612 | -5.020998 | -0.824429 |
| 240 | 1  | 0 | -4.318147 | -0.382279 | -1.502735 | 44 | 6 | 0 | -4.910223 | -4.770362 | -1.360049 |
| 241 | 1  | 0 | -6.604680 | -0.387478 | -0.362866 | 45 | 6 | 0 | -8.383356 | -1.594891 | 3.250536  |
| 242 | 1  | 0 | -5.361683 | -1.158855 | 0.644731  | 46 | 6 | 0 | -6.627237 | 0.108022  | 3.908685  |
| 243 | 1  | 0 | -5.896432 | 0.499985  | 0.999488  | 47 | 1 | 0 | -5.195554 | 1.597281  | 4.527634  |
| 244 | 35 | 0 | -0.656711 | 1.960432  | 0.208986  | 48 | 6 | 0 | -2.473522 | 5.002325  | 1.430846  |

RI-RI@As<sub>e</sub>+As<sub>e</sub>

Atom Atomic Coordinates (Angstroms)  
Type X Y Z

|   |   |   |           |           |           |
|---|---|---|-----------|-----------|-----------|
| 1 | 6 | 0 | -8.336837 | 1.553570  | -3.288643 |
| 2 | 6 | 0 | -7.733930 | 2.431618  | -2.192735 |
| 3 | 6 | 0 | -7.761748 | 0.140278  | -3.212507 |
| 4 | 1 | 0 | -8.008487 | 1.974735  | -4.242566 |
| 5 | 6 | 0 | -8.250614 | 2.443189  | -0.886757 |
| 6 | 6 | 0 | -6.643236 | 3.277284  | -2.452458 |
| 7 | 6 | 0 | -8.344974 | -0.899544 | -2.468064 |
| 8 | 6 | 0 | -6.590933 | -0.159129 | -3.926228 |
| 9 | 6 | 0 | -7.746838 | 3.264008  | 0.135303  |

|    |   |   |           |           |           |
|----|---|---|-----------|-----------|-----------|
| 49 | 6 | 0 | -6.686164 | -3.304295 | 2.404883  |
| 50 | 1 | 0 | -5.329959 | -4.802590 | 1.657165  |
| 51 | 6 | 0 | -2.466494 | -4.233280 | -2.661219 |
| 52 | 1 | 0 | -8.057937 | -2.024058 | 4.202076  |
| 53 | 8 | 0 | -6.094338 | -0.887933 | 4.756669  |
| 54 | 6 | 0 | -2.448730 | 4.200246  | 2.666137  |
| 55 | 8 | 0 | -6.143250 | -3.371482 | 3.712871  |
| 56 | 6 | 0 | -2.505880 | -5.002786 | -1.408966 |
| 57 | 6 | 0 | -4.851690 | -1.449513 | 4.451841  |
| 58 | 6 | 0 | -4.876739 | -2.805487 | 3.915223  |
| 59 | 6 | 0 | -2.443533 | -1.476874 | 4.421723  |
| 60 | 6 | 0 | -2.463510 | -2.855452 | 3.908822  |
| 61 | 6 | 0 | -3.680539 | 3.716479  | 3.233949  |
| 62 | 6 | 0 | -3.736844 | 5.247128  | 0.777069  |
| 63 | 6 | 0 | -3.701062 | 3.516122  | -3.740519 |
| 64 | 6 | 0 | -3.626012 | 0.760675  | -4.627050 |
| 65 | 6 | 0 | -3.679978 | -0.803240 | 4.712512  |

|     |    |   |            |           |           |     |   |   |          |           |           |
|-----|----|---|------------|-----------|-----------|-----|---|---|----------|-----------|-----------|
| 66  | 6  | 0 | -3.729139  | -3.503657 | 3.673673  | 122 | 8 | 0 | 6.073557 | 0.340631  | 4.848840  |
| 67  | 6  | 0 | -3.692471  | -3.777011 | -3.260181 | 123 | 6 | 0 | 8.430142 | 3.477789  | -1.191600 |
| 68  | 6  | 0 | -3.775389  | -5.256094 | -0.775163 | 124 | 6 | 0 | 6.708020 | 4.074819  | 0.593655  |
| 69  | 1  | 0 | -3.656460  | 3.212384  | 4.191751  | 125 | 1 | 0 | 5.324420 | 4.583154  | 2.163306  |
| 70  | 1  | 0 | -3.769681  | 5.859669  | -0.115655 | 126 | 6 | 0 | 4.850403 | 2.322467  | 4.174769  |
| 71  | 1  | 0 | -3.651694  | 0.179855  | 5.163993  | 127 | 6 | 0 | 8.368190 | -3.435820 | 1.184327  |
| 72  | 1  | 0 | -3.733841  | 4.557032  | -3.444053 | 128 | 6 | 0 | 6.616359 | -2.715787 | 2.857374  |
| 73  | 1  | 0 | -3.749165  | -4.530472 | 3.330631  | 129 | 1 | 0 | 5.193576 | -2.112075 | 4.357937  |
| 74  | 1  | 0 | -3.581819  | -0.245769 | -5.022446 | 130 | 6 | 0 | 4.830084 | 0.924072  | 4.588980  |
| 75  | 1  | 0 | -3.660467  | -3.294833 | -4.229027 | 131 | 1 | 0 | 8.118818 | 4.460506  | -1.555874 |
| 76  | 1  | 0 | -3.814946  | -5.852767 | 0.127806  | 132 | 6 | 0 | 7.829811 | 2.444630  | -2.143146 |
| 77  | 7  | 0 | -1.268898  | -3.399665 | 3.683235  | 133 | 8 | 0 | 6.205657 | 5.084158  | -0.265897 |
| 78  | 7  | 0 | -1.238146  | -0.942195 | 4.589980  | 134 | 6 | 0 | 7.757341 | -3.258875 | -0.203898 |
| 79  | 7  | 0 | -1.321540  | -5.416127 | -0.949998 | 135 | 1 | 0 | 8.048509 | -4.416644 | 1.546035  |
| 80  | 7  | 0 | -1.253333  | -4.037737 | -3.178899 | 136 | 8 | 0 | 6.100874 | -4.026173 | 2.754744  |
| 81  | 7  | 0 | -1.193079  | 0.905540  | -4.428523 | 137 | 6 | 0 | 8.378803 | 1.165262  | -2.340141 |
| 82  | 7  | 0 | -1.242386  | 3.410900  | -3.661847 | 138 | 6 | 0 | 6.662537 | 2.761109  | -2.856389 |
| 83  | 7  | 0 | -1.289927  | 5.447952  | 1.010483  | 139 | 6 | 0 | 4.939469 | 4.906209  | -0.839142 |
| 84  | 7  | 0 | -1.248943  | 4.006813  | 3.205434  | 140 | 6 | 0 | 2.438321 | 2.349947  | 4.129845  |
| 85  | 1  | 0 | -9.262568  | 0.658162  | 1.861656  | 141 | 6 | 0 | 8.273492 | -2.336702 | -1.128414 |
| 86  | 1  | 0 | -9.092232  | 1.794813  | -0.659129 | 142 | 6 | 0 | 6.651454 | -4.024560 | -0.610194 |
| 87  | 1  | 0 | -9.260493  | -0.698168 | -1.919270 | 143 | 6 | 0 | 4.853107 | -4.271477 | 2.176921  |
| 88  | 1  | 0 | -9.176487  | -1.873930 | 0.624822  | 144 | 6 | 0 | 2.422174 | 0.933521  | 4.526600  |
| 89  | 6  | 0 | -9.921840  | -1.586646 | 3.227571  | 145 | 6 | 0 | 7.797269 | 0.213026  | -3.195361 |
| 90  | 1  | 0 | -10.302263 | -2.607132 | 3.334221  | 146 | 6 | 0 | 6.071677 | 1.860316  | -3.740088 |
| 91  | 1  | 0 | -10.333967 | -1.176394 | 2.299638  | 147 | 8 | 0 | 6.151630 | 4.073533  | -2.760743 |
| 92  | 6  | 0 | -9.939148  | -3.291319 | -1.569638 | 148 | 6 | 0 | 4.907551 | 4.322378  | -2.175258 |
| 93  | 1  | 0 | -10.343289 | -2.385934 | -1.104794 | 149 | 6 | 0 | 7.759954 | -2.176221 | -2.426155 |
| 94  | 1  | 0 | -10.326141 | -4.148880 | -1.010836 | 150 | 6 | 0 | 6.112452 | -3.902137 | -1.889526 |
| 95  | 6  | 0 | -9.875357  | 1.567155  | -3.262626 | 151 | 8 | 0 | 6.134009 | -5.025019 | 0.249257  |
| 96  | 1  | 0 | -10.291564 | 1.170769  | -2.330545 | 152 | 6 | 0 | 4.872833 | -4.841585 | 0.831971  |
| 97  | 1  | 0 | -10.269192 | 0.962624  | -4.085727 | 153 | 6 | 0 | 8.369679 | -1.186207 | -3.418917 |
| 98  | 6  | 0 | -9.906082  | 3.260991  | 1.485602  | 154 | 6 | 0 | 6.630799 | 0.591912  | -3.877780 |
| 99  | 1  | 0 | -10.310806 | 2.359760  | 1.013311  | 155 | 1 | 0 | 5.226306 | 2.160628  | -4.345176 |
| 100 | 1  | 0 | -10.273192 | 4.122543  | 0.919525  | 156 | 6 | 0 | 2.538941 | 5.173744  | -0.889643 |
| 101 | 1  | 0 | -10.324708 | -3.338969 | -2.592903 | 157 | 6 | 0 | 6.665240 | -2.981333 | -2.779630 |
| 102 | 1  | 0 | -10.240884 | 2.592224  | -3.376694 | 158 | 1 | 0 | 5.301247 | -4.548990 | -2.202652 |
| 103 | 1  | 0 | -10.305518 | -0.982801 | 4.055897  | 159 | 6 | 0 | 2.453508 | -4.520589 | 2.250450  |
| 104 | 1  | 0 | -10.310354 | 3.313095  | 2.501402  | 160 | 1 | 0 | 8.045027 | -1.502007 | -4.413999 |
| 105 | 34 | 0 | 0.018624   | -4.861453 | -2.111066 | 161 | 8 | 0 | 6.080870 | -0.316984 | -4.809002 |
| 106 | 34 | 0 | 0.070482   | -2.179346 | 4.128552  | 162 | 6 | 0 | 2.506712 | 4.553765  | -2.222154 |
| 107 | 34 | 0 | 0.107802   | 2.162981  | -3.986829 | 163 | 8 | 0 | 6.135421 | -2.916975 | -4.095873 |
| 108 | 34 | 0 | 0.039359   | 4.861195  | 2.175451  | 164 | 6 | 0 | 2.473161 | -5.128329 | 0.909233  |
| 109 | 6  | 0 | 8.360953   | 1.217403  | 3.419409  | 165 | 6 | 0 | 4.842570 | -0.906575 | -4.553148 |
| 110 | 6  | 0 | 7.779433   | 2.210964  | 2.413165  | 166 | 6 | 0 | 4.870314 | -2.328013 | -4.222373 |
| 111 | 6  | 0 | 7.771050   | -0.175434 | 3.201582  | 167 | 6 | 0 | 2.437632 | -0.932473 | -4.451878 |
| 112 | 1  | 0 | 8.028725   | 1.545525  | 4.408068  | 168 | 6 | 0 | 2.459443 | -2.374915 | -4.159755 |
| 113 | 6  | 0 | 8.322871   | 2.386899  | 1.129904  | 169 | 6 | 0 | 3.734936 | 4.149436  | -2.853256 |
| 114 | 6  | 0 | 6.669128   | 3.003695  | 2.747993  | 170 | 6 | 0 | 3.802488 | 5.337244  | -0.216448 |
| 115 | 6  | 0 | 8.333871   | -1.124127 | 2.330362  | 171 | 6 | 0 | 3.699883 | 3.027877  | 3.973897  |
| 116 | 6  | 0 | 6.613568   | -0.555161 | 3.898681  | 172 | 6 | 0 | 3.661197 | 0.248212  | 4.776935  |
| 117 | 6  | 0 | 7.817229   | 3.309572  | 0.198313  | 173 | 6 | 0 | 3.668829 | -0.226098 | -4.681114 |
| 118 | 6  | 0 | 6.140652   | 3.938663  | 1.859503  | 174 | 6 | 0 | 3.726390 | -3.055249 | -4.066885 |
| 119 | 8  | 0 | 6.113327   | 2.916989  | 4.048821  | 175 | 6 | 0 | 3.687976 | -4.111015 | 2.868764  |
| 120 | 6  | 0 | 7.779591   | -2.400670 | 2.137749  | 176 | 6 | 0 | 3.730943 | -5.268928 | 0.216372  |
| 121 | 6  | 0 | 6.039746   | -1.817039 | 3.751244  | 177 | 1 | 0 | 3.710692 | 3.779338  | -3.870467 |

|     |    |   |           |           |           |
|-----|----|---|-----------|-----------|-----------|
| 178 | 1  | 0 | 3.837115  | 5.829533  | 0.747603  |
| 179 | 1  | 0 | 3.630963  | 0.814529  | -4.975476 |
| 180 | 1  | 0 | 3.713156  | 4.080764  | 3.721677  |
| 181 | 1  | 0 | 3.750930  | -4.120874 | -3.876368 |
| 182 | 1  | 0 | 3.637483  | -0.771396 | 5.138909  |
| 183 | 1  | 0 | 3.673103  | -3.748300 | 3.888838  |
| 184 | 1  | 0 | 3.757804  | -5.751969 | -0.752799 |
| 185 | 7  | 0 | 1.272054  | -2.937087 | -3.949926 |
| 186 | 7  | 0 | 1.235762  | -0.370517 | -4.477100 |
| 187 | 7  | 0 | 1.289220  | -5.520418 | 0.438161  |
| 188 | 7  | 0 | 1.256327  | -4.426161 | 2.824409  |
| 189 | 7  | 0 | 1.218924  | 0.378840  | 4.630968  |
| 190 | 7  | 0 | 1.244064  | 2.902021  | 3.929774  |
| 191 | 7  | 0 | 1.352867  | 5.547072  | -0.398992 |
| 192 | 7  | 0 | 1.297239  | 4.436117  | -2.773934 |
| 193 | 1  | 0 | 9.291456  | 0.903679  | -1.812542 |
| 194 | 1  | 0 | 9.178812  | 1.781702  | 0.844101  |
| 195 | 1  | 0 | 9.237489  | -0.861828 | 1.787866  |
| 196 | 1  | 0 | 9.121118  | -1.726255 | -0.829668 |
| 197 | 6  | 0 | 9.908039  | -1.205928 | -3.387363 |
| 198 | 1  | 0 | 10.306830 | -0.518027 | -4.139533 |
| 199 | 6  | 0 | 9.906102  | -3.411387 | 1.155885  |
| 200 | 1  | 0 | 10.313559 | -2.459851 | 0.798622  |
| 201 | 1  | 0 | 10.279952 | -4.199156 | 0.494671  |
| 202 | 6  | 0 | 9.899780  | 1.211329  | 3.407173  |
| 203 | 1  | 0 | 10.319036 | 0.897913  | 2.445292  |
| 204 | 1  | 0 | 10.277355 | 0.525757  | 4.172238  |
| 205 | 6  | 0 | 9.967463  | 3.438203  | -1.164653 |
| 206 | 1  | 0 | 10.365636 | 2.485291  | -0.800562 |
| 207 | 1  | 0 | 10.349196 | 4.226518  | -0.508711 |
| 208 | 34 | 0 | 0.023322  | 5.146045  | -1.630945 |
| 209 | 34 | 0 | -0.093585 | 1.642018  | 4.252394  |
| 210 | 34 | 0 | -0.072152 | -1.655050 | -4.144434 |
| 211 | 34 | 0 | -0.031619 | -5.133099 | 1.689335  |
| 212 | 1  | 0 | 10.300989 | -3.583915 | 2.161972  |
| 213 | 1  | 0 | 10.320185 | -0.911641 | -2.416458 |
| 214 | 1  | 0 | 10.278891 | 2.215457  | 3.620594  |
| 215 | 1  | 0 | 10.364086 | 3.600136  | -2.171873 |
| 216 | 1  | 0 | 10.272680 | -2.213752 | -3.608108 |
| 217 | 6  | 0 | 5.680429  | 0.242951  | 0.156634  |
| 218 | 6  | 0 | 4.551945  | -0.171666 | -0.800885 |
| 219 | 1  | 0 | 6.607008  | 0.463455  | -0.386388 |
| 220 | 1  | 0 | 5.403927  | 1.138483  | 0.731748  |
| 221 | 1  | 0 | 5.895115  | -0.565064 | 0.870280  |
| 222 | 6  | 0 | 3.296117  | -0.603349 | -0.017881 |
| 223 | 1  | 0 | 4.307301  | 0.658126  | -1.480806 |
| 224 | 1  | 0 | 4.894339  | -1.009210 | -1.430392 |
| 225 | 1  | 0 | 3.557103  | -1.449283 | 0.634564  |
| 226 | 1  | 0 | 2.963015  | 0.214864  | 0.634556  |
| 227 | 6  | 0 | 2.164878  | -1.005686 | -0.962108 |
| 228 | 1  | 0 | 2.471958  | -1.804828 | -1.641682 |
| 229 | 1  | 0 | 1.758107  | -0.157502 | -1.521532 |
| 230 | 53 | 0 | 0.479350  | -1.847100 | 0.143357  |
| 231 | 6  | 0 | -2.255965 | 1.018669  | -0.941160 |
| 232 | 1  | 0 | -2.589145 | 1.818542  | -1.606711 |
| 233 | 1  | 0 | -1.844721 | 0.185251  | -1.518595 |

|     |    |   |           |           |           |
|-----|----|---|-----------|-----------|-----------|
| 234 | 6  | 0 | -3.368836 | 0.590269  | 0.012020  |
| 235 | 6  | 0 | -4.638959 | 0.192516  | -0.764693 |
| 236 | 1  | 0 | -3.616012 | 1.416609  | 0.694380  |
| 237 | 1  | 0 | -3.027519 | -0.248644 | 0.633232  |
| 238 | 6  | 0 | -5.749174 | -0.259602 | 0.195166  |
| 239 | 1  | 0 | -4.990645 | 1.057157  | -1.351125 |
| 240 | 1  | 0 | -4.409426 | -0.606719 | -1.485120 |
| 241 | 1  | 0 | -6.692123 | -0.432968 | -0.336174 |
| 242 | 1  | 0 | -5.474443 | -1.191299 | 0.710565  |
| 243 | 1  | 0 | -5.931274 | 0.509948  | 0.958124  |
| 244 | 53 | 0 | -0.570030 | 1.876578  | 0.147395  |

RBr-RBr@A<sub>Se</sub>+A<sub>Te</sub>

| Atom | Atomic Type | Coordinates (Angstroms) |           |           |           |
|------|-------------|-------------------------|-----------|-----------|-----------|
|      |             | X                       | Y         | Z         |           |
| 1    | 6           | 0                       | -8.333448 | 1.264074  | -3.432410 |
| 2    | 6           | 0                       | -7.729264 | 2.233112  | -2.416919 |
| 3    | 6           | 0                       | -7.760414 | -0.138562 | -3.235362 |
| 4    | 1           | 0                       | -8.004230 | 1.600503  | -4.419196 |
| 5    | 6           | 0                       | -8.250228 | 2.371379  | -1.119653 |
| 6    | 6           | 0                       | -6.627740 | 3.037911  | -2.749610 |
| 7    | 6           | 0                       | -8.336797 | -1.101435 | -2.389262 |
| 8    | 6           | 0                       | -6.600680 | -0.510322 | -3.933250 |
| 9    | 6           | 0                       | -7.732699 | 3.271122  | -0.173848 |
| 10   | 6           | 0                       | -6.075590 | 3.938100  | -1.838966 |
| 11   | 8           | 0                       | -6.092104 | 2.993739  | -4.063230 |
| 12   | 6           | 0                       | -7.794419 | -2.387740 | -2.220573 |
| 13   | 6           | 0                       | -6.046869 | -1.783252 | -3.820499 |
| 14   | 8           | 0                       | -6.047799 | 0.411615  | -4.849714 |
| 15   | 6           | 0                       | -8.349902 | 3.426337  | 1.214414  |
| 16   | 6           | 0                       | -6.620419 | 4.038120  | -0.560078 |
| 17   | 1           | 0                       | -5.258040 | 4.585087  | -2.134211 |
| 18   | 6           | 0                       | -4.828124 | 2.401927  | -4.199860 |
| 19   | 6           | 0                       | -8.400309 | -3.432653 | -1.285976 |
| 20   | 6           | 0                       | -6.635749 | -2.698433 | -2.950178 |
| 21   | 1           | 0                       | -5.204402 | -2.075541 | -4.433571 |
| 22   | 6           | 0                       | -4.806209 | 0.990334  | -4.575620 |
| 23   | 1           | 0                       | -8.025158 | 4.398501  | 1.594741  |
| 24   | 6           | 0                       | -7.777882 | 2.372362  | 2.157878  |
| 25   | 8           | 0                       | -6.093849 | 5.011890  | 0.323373  |
| 26   | 6           | 0                       | -7.804360 | -3.282799 | 0.113043  |
| 27   | 1           | 0                       | -8.082539 | -4.409905 | -1.659303 |
| 28   | 8           | 0                       | -6.120373 | -4.011872 | -2.881539 |
| 29   | 6           | 0                       | -8.338746 | 1.094614  | 2.322542  |
| 30   | 6           | 0                       | -6.625125 | 2.671630  | 2.900492  |
| 31   | 6           | 0                       | -4.837250 | 4.782865  | 0.904106  |
| 32   | 6           | 0                       | -2.403117 | 2.443432  | -4.137914 |
| 33   | 6           | 0                       | -8.326260 | -2.385232 | 1.059638  |
| 34   | 6           | 0                       | -6.692927 | -4.047979 | 0.501767  |
| 35   | 6           | 0                       | -4.875128 | -4.245010 | -2.286292 |
| 36   | 6           | 0                       | -2.387398 | 0.994828  | -4.481069 |
| 37   | 6           | 0                       | -7.792195 | 0.130794  | 3.187741  |

|    |   |   |            |           |           |     |    |   |            |           |           |
|----|---|---|------------|-----------|-----------|-----|----|---|------------|-----------|-----------|
| 38 | 6 | 0 | -6.065852  | 1.757270  | 3.789536  | 94  | 1  | 0 | -10.325478 | -4.192913 | -0.632411 |
| 39 | 8 | 0 | -6.092636  | 3.976457  | 2.816737  | 95  | 6  | 0 | -9.871997  | 1.280301  | -3.407882 |
| 40 | 6 | 0 | -4.836776  | 4.193137  | 2.240755  | 96  | 1  | 0 | -10.288060 | 0.962956  | -2.445925 |
| 41 | 6 | 0 | -7.796150  | -2.236161 | 2.352095  | 97  | 1  | 0 | -10.265699 | 0.608623  | -4.177246 |
| 42 | 6 | 0 | -6.141412  | -3.940831 | 1.776952  | 98  | 6  | 0 | -9.887898  | 3.413656  | 1.175511  |
| 43 | 8 | 0 | -6.172356  | -5.024009 | -0.382747 | 99  | 1  | 0 | -10.299140 | 2.470032  | 0.801817  |
| 44 | 6 | 0 | -4.904366  | -4.813170 | -0.942086 | 100 | 1  | 0 | -10.251936 | 4.213508  | 0.523274  |
| 45 | 6 | 0 | -8.388358  | -1.264003 | 3.372174  | 101 | 1  | 0 | -10.323025 | -3.548505 | -2.289149 |
| 46 | 6 | 0 | -6.644168  | 0.494867  | 3.908745  | 102 | 1  | 0 | -10.237644 | 2.292275  | -3.607364 |
| 47 | 1 | 0 | -5.226606  | 2.038665  | 4.411858  | 103 | 1  | 0 | -10.311096 | -0.583483 | 4.118510  |
| 48 | 6 | 0 | -2.415842  | 4.979972  | 0.972243  | 104 | 1  | 0 | -10.288205 | 3.573946  | 2.181532  |
| 49 | 6 | 0 | -6.685976  | -3.031268 | 2.681897  | 105 | 52 | 0 | 0.210937   | -4.927808 | -1.673120 |
| 50 | 1 | 0 | -5.324031  | -4.586276 | 2.074601  | 106 | 52 | 0 | 0.246038   | -1.715597 | 4.330688  |
| 51 | 6 | 0 | -2.455952  | -4.413601 | -2.318071 | 107 | 52 | 0 | 0.303502   | 1.710273  | -4.165732 |
| 52 | 1 | 0 | -8.067364  | -1.612599 | 4.357527  | 108 | 52 | 0 | 0.262041   | 4.879681  | 1.763672  |
| 53 | 8 | 0 | -6.117092  | -0.416976 | 4.850351  | 109 | 6  | 0 | 8.297137   | 1.490458  | 3.302669  |
| 54 | 6 | 0 | -2.418166  | 4.340864  | 2.315206  | 110 | 6  | 0 | 7.714190   | 2.391449  | 2.214893  |
| 55 | 8 | 0 | -6.147388  | -2.974220 | 3.990633  | 111 | 6  | 0 | 7.701641   | 0.087087  | 3.206963  |
| 56 | 6 | 0 | -2.485166  | -5.006838 | -0.955808 | 112 | 1  | 0 | 7.969358   | 1.904551  | 4.259924  |
| 57 | 6 | 0 | -4.868482  | -0.996473 | 4.596169  | 113 | 6  | 0 | 8.255443   | 2.451887  | 0.920362  |
| 58 | 6 | 0 | -4.883734  | -2.385582 | 4.148568  | 114 | 6  | 0 | 6.605958   | 3.212005  | 2.481780  |
| 59 | 6 | 0 | -2.446645  | -1.003396 | 4.580238  | 115 | 6  | 0 | 8.256348   | -0.932068 | 2.414113  |
| 60 | 6 | 0 | -2.457758  | -2.425202 | 4.144586  | 116 | 6  | 0 | 6.549920   | -0.229413 | 3.943818  |
| 61 | 6 | 0 | -3.677081  | 3.976239  | 2.922566  | 117 | 6  | 0 | 7.751308   | 3.292604  | -0.086246 |
| 62 | 6 | 0 | -3.680944  | 5.172762  | 0.293881  | 118 | 6  | 0 | 6.077592   | 4.067150  | 1.516431  |
| 63 | 6 | 0 | -3.680319  | 3.113826  | -4.019950 | 119 | 8  | 0 | 6.058727   | 3.242834  | 3.789121  |
| 64 | 6 | 0 | -3.635789  | 0.311408  | -4.723519 | 120 | 6  | 0 | 7.702937   | -2.221269 | 2.338639  |
| 65 | 6 | 0 | -3.701612  | -0.330844 | 4.818849  | 121 | 6  | 0 | 5.977845   | -1.499792 | 3.913114  |
| 66 | 6 | 0 | -3.730666  | -3.084659 | 3.950647  | 122 | 8  | 0 | 6.016996   | 0.746426  | 4.817216  |
| 67 | 6 | 0 | -3.702188  | -4.055480 | -2.955290 | 123 | 6  | 0 | 8.368174   | 3.343766  | -1.483469 |
| 68 | 6 | 0 | -3.761636  | -5.194800 | -0.302977 | 124 | 6  | 0 | 6.644331   | 4.091376  | 0.242948  |
| 69 | 1 | 0 | -3.673633  | 3.596274  | 3.936881  | 125 | 1  | 0 | 5.264698   | 4.739198  | 1.764628  |
| 70 | 1 | 0 | -3.691652  | 5.669698  | -0.669208 | 126 | 6  | 0 | 4.796599   | 2.668962  | 3.984114  |
| 71 | 1 | 0 | -3.683916  | 0.680467  | 5.205529  | 127 | 6  | 0 | 8.289034   | -3.334861 | 1.475799  |
| 72 | 1 | 0 | -3.699270  | 4.173393  | -3.794890 | 128 | 6  | 0 | 6.548779   | -2.472568 | 3.095957  |
| 73 | 1 | 0 | -3.741729  | -4.131861 | 3.673368  | 129 | 1  | 0 | 5.138478   | -1.741368 | 4.552299  |
| 74 | 1 | 0 | -3.606069  | -0.720057 | -5.051423 | 130 | 6  | 0 | 4.774822   | 1.312773  | 4.520353  |
| 75 | 1 | 0 | -3.680594  | -3.696819 | -3.977278 | 131 | 1  | 0 | 8.056728   | 4.291557  | -1.930643 |
| 76 | 1 | 0 | -3.789536  | -5.671869 | 0.669363  | 132 | 6  | 0 | 7.772929   | 2.232781  | -2.345838 |
| 77 | 7 | 0 | -1.280863  | -2.997457 | 3.940168  | 133 | 8  | 0 | 6.140221   | 5.020386  | -0.702516 |
| 78 | 7 | 0 | -1.264191  | -0.427454 | 4.721128  | 134 | 6  | 0 | 7.686997   | -3.273574 | 0.073773  |
| 79 | 7 | 0 | -1.316217  | -5.322797 | -0.411203 | 135 | 1  | 0 | 7.963061   | -4.280499 | 1.916883  |
| 80 | 7 | 0 | -1.263720  | -4.255221 | -2.878456 | 136 | 8  | 0 | 6.024809   | -3.784971 | 3.106782  |
| 81 | 7 | 0 | -1.206599  | 0.407269  | -4.535588 | 137 | 6  | 0 | 8.322110   | 0.941156  | -2.429195 |
| 82 | 7 | 0 | -1.234749  | 3.018739  | -3.906671 | 138 | 6  | 0 | 6.611147   | 2.487956  | -3.091117 |
| 83 | 7 | 0 | -1.237134  | 5.336265  | 0.479821  | 139 | 6  | 0 | 4.877510   | 4.777762  | -1.258078 |
| 84 | 7 | 0 | -1.243299  | 4.165248  | 2.899601  | 140 | 6  | 0 | 2.383701   | 2.713213  | 3.983778  |
| 85 | 1 | 0 | -9.234312  | 0.842941  | 1.761725  | 141 | 6  | 0 | 8.215291   | -2.442674 | -0.927082 |
| 86 | 1 | 0 | -9.103629  | 1.760797  | -0.838018 | 142 | 6  | 0 | 6.575223   | -4.061550 | -0.268314 |
| 87 | 1 | 0 | -9.241944  | -0.843678 | -1.846841 | 143 | 6  | 0 | 4.775831   | -4.046964 | 2.539811  |
| 88 | 1 | 0 | -9.183814  | -1.779575 | 0.779680  | 144 | 6  | 0 | 2.365453   | 1.338681  | 4.502596  |
| 89 | 6 | 0 | -9.926815  | -1.253418 | 3.342935  | 145 | 6  | 0 | 7.745777   | -0.079916 | -3.204672 |
| 90 | 1 | 0 | -10.311040 | -2.260960 | 3.529868  | 146 | 6  | 0 | 6.023814   | 1.515365  | -3.897098 |
| 91 | 1 | 0 | -10.334287 | -0.917480 | 2.383565  | 147 | 8  | 0 | 6.097286   | 3.803257  | -3.106857 |
| 92 | 6 | 0 | -9.938148  | -3.396866 | -1.275764 | 148 | 6  | 0 | 4.852284   | 4.085519  | -2.540410 |
| 93 | 1 | 0 | -10.342179 | -2.448506 | -0.906194 | 149 | 6  | 0 | 7.705761   | -2.392379 | -2.235635 |



|     |   |   |           |           |           |     |    |   |           |           |           |
|-----|---|---|-----------|-----------|-----------|-----|----|---|-----------|-----------|-----------|
| 150 | 6 | 0 | 6.043752  | -4.052229 | -1.556336 | 206 | 1  | 0 | 10.304242 | 2.391316  | -1.004590 |
| 151 | 8 | 0 | 6.039652  | -4.969616 | 0.678594  | 207 | 1  | 0 | 10.283880 | 4.150772  | -0.859602 |
| 152 | 6 | 0 | 4.783423  | -4.705803 | 1.238164  | 208 | 1  | 0 | 10.215954 | -3.411505 | 2.473032  |
| 153 | 6 | 0 | 8.320733  | -1.492240 | -3.307153 | 209 | 1  | 0 | 10.267502 | -1.128973 | -2.325209 |
| 154 | 6 | 0 | 6.582563  | 0.239669  | -3.921873 | 210 | 1  | 0 | 10.218708 | 2.495669  | 3.410757  |
| 155 | 1 | 0 | 5.184412  | 1.763612  | -4.533203 | 211 | 1  | 0 | 10.305158 | 3.387582  | -2.464252 |
| 156 | 6 | 0 | 2.472278  | 4.982094  | -1.313169 | 212 | 1  | 0 | 10.225143 | -2.529984 | -3.399153 |
| 157 | 6 | 0 | 6.607204  | -3.218437 | -2.521958 | 213 | 34 | 0 | -0.069841 | 4.793665  | -2.002781 |
| 158 | 1 | 0 | 5.230734  | -4.720243 | -1.815601 | 214 | 34 | 0 | -0.173840 | 2.035061  | 4.197221  |
| 159 | 6 | 0 | 2.370582  | -4.207769 | 2.609376  | 215 | 34 | 0 | -0.145319 | -2.043761 | -4.088994 |
| 160 | 1 | 0 | 8.000550  | -1.891753 | -4.273142 | 216 | 34 | 0 | -0.155964 | -4.746300 | 2.068646  |
| 161 | 8 | 0 | 6.035173  | -0.745024 | -4.774455 | 217 | 6  | 0 | 5.478607  | 0.157259  | 0.088690  |
| 162 | 6 | 0 | 2.447673  | 4.255289  | -2.587033 | 218 | 6  | 0 | 4.312796  | -0.300406 | -0.805142 |
| 163 | 8 | 0 | 6.085877  | -3.271346 | -3.842530 | 219 | 1  | 0 | 6.380578  | 0.360899  | -0.502064 |
| 164 | 6 | 0 | 2.375517  | -4.899646 | 1.314637  | 220 | 1  | 0 | 5.220598  | 1.074484  | 0.637597  |
| 165 | 6 | 0 | 4.795748  | -1.309236 | -4.477251 | 221 | 1  | 0 | 5.729628  | -0.618896 | 0.826178  |
| 166 | 6 | 0 | 4.822171  | -2.698340 | -4.031200 | 222 | 6  | 0 | 3.073710  | -0.669612 | 0.035909  |
| 167 | 6 | 0 | 2.389968  | -1.331288 | -4.401124 | 223 | 1  | 0 | 4.057468  | 0.493068  | -1.524021 |
| 168 | 6 | 0 | 2.410618  | -2.746480 | -4.002072 | 224 | 1  | 0 | 4.627288  | -1.175314 | -1.396988 |
| 169 | 6 | 0 | 3.680261  | 3.833915  | -3.195655 | 225 | 1  | 0 | 3.334502  | -1.488557 | 0.722207  |
| 170 | 6 | 0 | 3.733820  | 5.236306  | -0.667178 | 226 | 1  | 0 | 2.772067  | 0.186700  | 0.653363  |
| 171 | 6 | 0 | 3.646268  | 3.364362  | 3.745235  | 227 | 6  | 0 | 1.905599  | -1.092606 | -0.848734 |
| 172 | 6 | 0 | 3.603947  | 0.666361  | 4.788937  | 228 | 1  | 0 | 2.151937  | -1.954713 | -1.475793 |
| 173 | 6 | 0 | 3.622422  | -0.641624 | -4.670336 | 229 | 1  | 0 | 1.510986  | -0.268475 | -1.450806 |
| 174 | 6 | 0 | 3.676760  | -3.413662 | -3.834108 | 230 | 35 | 0 | 0.350848  | -1.710481 | 0.283153  |
| 175 | 6 | 0 | 3.612608  | -3.805309 | 3.212369  | 231 | 6  | 0 | -2.108533 | 1.030900  | -0.973233 |
| 176 | 6 | 0 | 3.629340  | -5.134801 | 0.643706  | 232 | 1  | 0 | -2.403385 | 1.838347  | -1.647278 |
| 177 | 1 | 0 | 3.662642  | 3.388011  | -4.182551 | 233 | 1  | 0 | -1.717832 | 0.175573  | -1.531960 |
| 178 | 1 | 0 | 3.764476  | 5.811583  | 0.250384  | 234 | 6  | 0 | -3.223362 | 0.652505  | -0.006733 |
| 179 | 1 | 0 | 3.592916  | 0.368530  | -5.058407 | 235 | 6  | 0 | -4.493707 | 0.231181  | -0.774666 |
| 180 | 1 | 0 | 3.666950  | 4.394213  | 3.409967  | 236 | 1  | 0 | -3.461070 | 1.509394  | 0.639907  |
| 181 | 1 | 0 | 3.702442  | -4.462951 | -3.566315 | 237 | 1  | 0 | -2.888697 | -0.164850 | 0.645014  |
| 182 | 1 | 0 | 3.585067  | -0.314073 | 5.248110  | 238 | 6  | 0 | -5.614011 | -0.185708 | 0.192249  |
| 183 | 1 | 0 | 3.608847  | -3.383230 | 4.209798  | 239 | 1  | 0 | -4.840549 | 1.073104  | -1.395512 |
| 184 | 1 | 0 | 3.649853  | -5.691326 | -0.285911 | 240 | 1  | 0 | -4.263619 | -0.596731 | -1.462082 |
| 185 | 7 | 0 | 1.218453  | -3.287028 | -3.769234 | 241 | 1  | 0 | -6.545150 | -0.402005 | -0.345811 |
| 186 | 7 | 0 | 1.182203  | -0.788064 | -4.479717 | 242 | 1  | 0 | -5.334385 | -1.085101 | 0.759494  |
| 187 | 7 | 0 | 1.172698  | -5.255244 | 0.862247  | 243 | 1  | 0 | -5.821797 | 0.618280  | 0.912337  |
| 188 | 7 | 0 | 1.168510  | -4.018754 | 3.148575  | 244 | 35 | 0 | -0.516121 | 1.783515  | 0.029506  |
| 189 | 7 | 0 | 1.156454  | 0.811068  | 4.659325  |     |    |   |           |           |           |
| 190 | 7 | 0 | 1.185652  | 3.239659  | 3.745918  |     |    |   |           |           |           |
| 191 | 7 | 0 | 1.275485  | 5.332927  | -0.835993 |     |    |   |           |           |           |
| 192 | 7 | 0 | 1.232731  | 4.042528  | -3.093580 |     |    |   |           |           |           |
| 193 | 1 | 0 | 9.231490  | 0.725695  | -1.875918 |     |    |   |           |           |           |
| 194 | 1 | 0 | 9.111543  | 1.824526  | 0.688323  |     |    |   |           |           |           |
| 195 | 1 | 0 | 9.155227  | -0.717018 | 1.843669  |     |    |   |           |           |           |
| 196 | 1 | 0 | 9.068883  | -1.817330 | -0.681191 |     |    |   |           |           |           |
| 197 | 6 | 0 | 9.858856  | -1.507270 | -3.268055 |     |    |   |           |           |           |
| 198 | 1 | 0 | 10.259884 | -0.887257 | -4.075914 |     |    |   |           |           |           |
| 199 | 6 | 0 | 9.827339  | -3.319798 | 1.454066  |     |    |   |           |           |           |
| 200 | 1 | 0 | 10.241371 | -2.402320 | 1.022969  |     |    |   |           |           |           |
| 201 | 1 | 0 | 10.200958 | -4.160513 | 0.861539  |     |    |   |           |           |           |
| 202 | 6 | 0 | 9.835879  | 1.478015  | 3.287152  |     |    |   |           |           |           |
| 203 | 1 | 0 | 10.252015 | 1.079606  | 2.355899  |     |    |   |           |           |           |
| 204 | 1 | 0 | 10.213163 | 0.861407  | 4.108876  |     |    |   |           |           |           |
| 205 | 6 | 0 | 9.905547  | 3.309588  | -1.448325 |     |    |   |           |           |           |

  

| RBr-RI@As <sub>e</sub> +A <sub>Te</sub> |             |                         |           |           |           |  |  |  |  |  |  |
|-----------------------------------------|-------------|-------------------------|-----------|-----------|-----------|--|--|--|--|--|--|
| Atom                                    | Atomic Type | Coordinates (Angstroms) |           |           |           |  |  |  |  |  |  |
|                                         |             | X                       | Y         | Z         |           |  |  |  |  |  |  |
| 1                                       | 6           | 0                       | -8.307222 | 1.912852  | -3.083397 |  |  |  |  |  |  |
| 2                                       | 6           | 0                       | -7.698981 | 2.664214  | -1.899891 |  |  |  |  |  |  |
| 3                                       | 6           | 0                       | -7.727094 | 0.502093  | -3.166669 |  |  |  |  |  |  |
| 4                                       | 1           | 0                       | -7.986094 | 2.438614  | -3.986557 |  |  |  |  |  |  |
| 5                                       | 6           | 0                       | -8.209077 | 2.532211  | -0.598091 |  |  |  |  |  |  |
| 6                                       | 6           | 0                       | -6.608196 | 3.532315  | -2.070728 |  |  |  |  |  |  |
| 7                                       | 6           | 0                       | -8.302082 | -0.614529 | -2.535229 |  |  |  |  |  |  |
| 8                                       | 6           | 0                       | -6.560437 | 0.285802  | -3.915716 |  |  |  |  |  |  |
| 9                                       | 6           | 0                       | -7.699896 | 3.234593  | 0.506861  |  |  |  |  |  |  |

|    |   |   |           |           |           |     |    |   |            |           |           |
|----|---|---|-----------|-----------|-----------|-----|----|---|------------|-----------|-----------|
| 10 | 6 | 0 | -6.060906 | 4.239172  | -1.001168 | 66  | 6  | 0 | -3.664182  | -3.896641 | 3.309098  |
| 11 | 8 | 0 | -6.082056 | 3.763044  | -3.369914 | 67  | 6  | 0 | -3.639077  | -3.336283 | -3.621075 |
| 12 | 6 | 0 | -7.747146 | -1.903787 | -2.619894 | 68  | 6  | 0 | -3.708960  | -5.101251 | -1.331397 |
| 13 | 6 | 0 | -5.997416 | -0.979813 | -4.058964 | 69  | 1  | 0 | -3.594951  | 2.681244  | 4.478941  |
| 14 | 8 | 0 | -6.014002 | 1.377738  | -4.627271 | 70  | 1  | 0 | -3.705860  | 5.813606  | 0.512277  |
| 15 | 6 | 0 | -8.319674 | 3.097392  | 1.897218  | 71  | 1  | 0 | -3.599167  | -0.387283 | 5.172523  |
| 16 | 6 | 0 | -6.601546 | 4.079867  | 0.274355  | 72  | 1  | 0 | -3.709832  | 4.934156  | -2.959470 |
| 17 | 1 | 0 | -5.253598 | 4.943869  | -1.164927 | 73  | 1  | 0 | -3.687304  | -4.887246 | 2.870957  |
| 18 | 6 | 0 | -4.814804 | 3.229763  | -3.635042 | 74  | 1  | 0 | -3.563703  | 0.334191  | -5.055581 |
| 19 | 6 | 0 | -8.345831 | -3.123674 | -1.921093 | 75  | 1  | 0 | -3.612748  | -2.748667 | -4.530428 |
| 20 | 6 | 0 | -6.581495 | -2.052120 | -3.387688 | 76  | 1  | 0 | -3.745969  | -5.805193 | -0.508599 |
| 21 | 1 | 0 | -5.155792 | -1.138616 | -4.720237 | 77  | 7  | 0 | -1.198306  | -3.788490 | 3.355783  |
| 22 | 6 | 0 | -4.779524 | 1.909356  | -4.255815 | 78  | 7  | 0 | -1.176094  | -1.450617 | 4.486253  |
| 23 | 1 | 0 | -7.999652 | 3.970926  | 2.471374  | 79  | 7  | 0 | -1.246618  | -5.169832 | -1.495898 |
| 24 | 6 | 0 | -7.744101 | 1.871209  | 2.601236  | 80  | 7  | 0 | -1.192892  | -3.539782 | -3.522691 |
| 25 | 8 | 0 | -6.078011 | 4.875749  | 1.325488  | 81  | 7  | 0 | -1.162023  | 1.429259  | -4.348593 |
| 26 | 6 | 0 | -7.744879 | -3.267924 | -0.523085 | 82  | 7  | 0 | -1.210240  | 3.820633  | -3.331362 |
| 27 | 1 | 0 | -8.027676 | -4.000501 | -2.491439 | 83  | 7  | 0 | -1.210649  | 5.193593  | 1.536460  |
| 28 | 8 | 0 | -6.057117 | -3.350636 | -3.570009 | 84  | 7  | 0 | -1.177901  | 3.511799  | 3.523371  |
| 29 | 6 | 0 | -8.311752 | 0.587458  | 2.524196  | 85  | 1  | 0 | -9.228676  | 0.456198  | 1.957030  |
| 30 | 6 | 0 | -6.567869 | 2.012889  | 3.353633  | 86  | 1  | 0 | -9.050258  | 1.863067  | -0.439586 |
| 31 | 6 | 0 | -4.813602 | 4.545173  | 1.832158  | 87  | 1  | 0 | -9.215083  | -0.477154 | -1.963047 |
| 32 | 6 | 0 | -2.401189 | 3.304445  | -3.624144 | 88  | 1  | 0 | -9.117694  | -1.926721 | 0.435811  |
| 33 | 6 | 0 | -8.263107 | -2.580450 | 0.587187  | 89  | 6  | 0 | -9.867628  | -1.938048 | 3.049227  |
| 34 | 6 | 0 | -6.635441 | -4.099719 | -0.297920 | 90  | 1  | 0 | -10.243150 | -2.965772 | 3.043201  |
| 35 | 6 | 0 | -4.816421 | -3.695230 | -3.028881 | 91  | 1  | 0 | -10.281257 | -1.430839 | 2.171283  |
| 36 | 6 | 0 | -2.372450 | 1.950578  | -4.197668 | 92  | 6  | 0 | -9.883799  | -3.096553 | -1.898296 |
| 37 | 6 | 0 | -7.742230 | -0.532201 | 3.156821  | 93  | 1  | 0 | -10.289556 | -2.249407 | -1.335503 |
| 38 | 6 | 0 | -5.990057 | 0.940313  | 4.027319  | 94  | 1  | 0 | -10.265910 | -4.011885 | -1.436381 |
| 39 | 8 | 0 | -6.035693 | 3.310206  | 3.512730  | 95  | 6  | 0 | -9.845490  | 1.918247  | -3.047588 |
| 40 | 6 | 0 | -4.789884 | 3.652461  | 2.986502  | 96  | 1  | 0 | -10.255381 | 1.419434  | -2.163174 |
| 41 | 6 | 0 | -7.733533 | -2.695435 | 1.883418  | 97  | 1  | 0 | -10.242406 | 1.407792  | -3.930598 |
| 42 | 6 | 0 | -6.081606 | -4.250193 | 0.971894  | 98  | 6  | 0 | -9.857423  | 3.088959  | 1.851916  |
| 43 | 8 | 0 | -6.117452 | -4.886564 | -1.358398 | 99  | 1  | 0 | -10.265218 | 2.243966  | 1.287366  |
| 44 | 6 | 0 | -4.849643 | -4.565541 | -1.860545 | 100 | 1  | 0 | -10.222490 | 4.006641  | 1.380890  |
| 45 | 6 | 0 | -8.329359 | -1.941249 | 3.073343  | 101 | 1  | 0 | -10.272593 | -3.033043 | -2.919378 |
| 46 | 6 | 0 | -6.572543 | -0.319361 | 3.902609  | 102 | 1  | 0 | -10.214563 | 2.948300  | -3.045324 |
| 47 | 1 | 0 | -5.137840 | 1.091084  | 4.676488  | 103 | 1  | 0 | -10.255071 | -1.430737 | 3.938248  |
| 48 | 6 | 0 | -2.405543 | 4.746387  | 1.922384  | 104 | 1  | 0 | -10.260964 | 3.034638  | 2.867814  |
| 49 | 6 | 0 | -6.623965 | -3.542365 | 2.043554  | 105 | 34 | 0 | 0.105326   | -4.450526 | -2.555673 |
| 50 | 1 | 0 | -5.264562 | -4.943634 | 1.133003  | 106 | 34 | 0 | 0.154286   | -2.630303 | 3.934410  |
| 51 | 6 | 0 | -2.410206 | -3.834512 | -3.066062 | 107 | 34 | 0 | 0.158616   | 2.634203  | -3.810292 |
| 52 | 1 | 0 | -8.002727 | -2.470359 | 3.972788  | 108 | 34 | 0 | 0.134346   | 4.448568  | 2.598724  |
| 53 | 8 | 0 | -6.036269 | -1.403445 | 4.631670  | 109 | 6  | 0 | 8.370732   | 0.841378  | 3.523026  |
| 54 | 6 | 0 | -2.384806 | 3.803747  | 3.049518  | 110 | 6  | 0 | 7.782303   | 1.935844  | 2.631575  |
| 55 | 8 | 0 | -6.078893 | -3.759188 | 3.335032  | 111 | 6  | 0 | 7.787830   | -0.524880 | 3.161770  |
| 56 | 6 | 0 | -2.441860 | -4.749755 | -1.919635 | 112 | 1  | 0 | 8.039800   | 1.060497  | 4.541898  |
| 57 | 6 | 0 | -4.792385 | -1.927004 | 4.275969  | 113 | 6  | 0 | 8.321679   | 2.250648  | 1.373075  |
| 58 | 6 | 0 | -4.813993 | -3.220535 | 3.603799  | 114 | 6  | 0 | 6.669796   | 2.683794  | 3.051629  |
| 59 | 6 | 0 | -2.384407 | -1.960436 | 4.269602  | 115 | 6  | 0 | 8.350836   | -1.375633 | 2.194721  |
| 60 | 6 | 0 | -2.400128 | -3.280612 | 3.625576  | 116 | 6  | 0 | 6.635976   | -0.981452 | 3.822514  |
| 61 | 6 | 0 | -3.617322 | 3.285653  | 3.580762  | 117 | 6  | 0 | 7.811052   | 3.267543  | 0.547683  |
| 62 | 6 | 0 | -3.670779 | 5.094823  | 1.322517  | 118 | 6  | 0 | 6.134832   | 3.705518  | 2.268942  |
| 63 | 6 | 0 | -3.674001 | 3.928596  | -3.361109 | 119 | 8  | 0 | 6.110686   | 2.449964  | 4.331996  |
| 64 | 6 | 0 | -3.600315 | 1.285685  | -4.540351 | 120 | 6  | 0 | 7.801596   | -2.629216 | 1.872567  |
| 65 | 6 | 0 | -3.621317 | -1.313955 | 4.613024  | 121 | 6  | 0 | 6.069244   | -2.224145 | 3.547450  |

|     |   |   |          |           |           |     |    |   |           |           |           |
|-----|---|---|----------|-----------|-----------|-----|----|---|-----------|-----------|-----------|
| 122 | 8 | 0 | 6.093560 | -0.193314 | 4.862276  | 178 | 1  | 0 | 3.800191  | 5.628356  | 1.369968  |
| 123 | 6 | 0 | 8.421498 | 3.596107  | -0.814525 | 179 | 1  | 0 | 3.644567  | 1.397843  | -4.951176 |
| 124 | 6 | 0 | 6.697969 | 3.979734  | 1.023978  | 180 | 1  | 0 | 3.697466  | 3.609983  | 4.073908  |
| 125 | 1 | 0 | 5.316368 | 4.309168  | 2.641808  | 181 | 1  | 0 | 3.715864  | -3.596287 | -4.183130 |
| 126 | 6 | 0 | 4.851097 | 1.833583  | 4.382769  | 182 | 1  | 0 | 3.664776  | -1.345111 | 5.052017  |
| 127 | 6 | 0 | 8.386907 | -3.548861 | 0.804117  | 183 | 1  | 0 | 3.698341  | -4.149941 | 3.494599  |
| 128 | 6 | 0 | 6.644499 | -3.023187 | 2.562756  | 184 | 1  | 0 | 3.730002  | -5.522017 | -1.367368 |
| 129 | 1 | 0 | 5.224644 | -2.583388 | 4.120629  | 185 | 7  | 0 | 1.261187  | -2.427761 | -4.173084 |
| 130 | 6 | 0 | 4.842193 | 0.401657  | 4.664158  | 186 | 7  | 0 | 1.238242  | 0.232764  | -4.546905 |
| 131 | 1 | 0 | 8.106447 | 4.613319  | -1.062328 | 187 | 7  | 0 | 1.275664  | -5.393431 | -0.184266 |
| 132 | 6 | 0 | 7.824075 | 2.678692  | -1.879099 | 188 | 7  | 0 | 1.270638  | -4.612439 | 2.392709  |
| 133 | 8 | 0 | 6.186627 | 5.070335  | 0.277636  | 189 | 7  | 0 | 1.241129  | -0.207931 | 4.654444  |
| 134 | 6 | 0 | 7.775623 | -3.209857 | -0.554610 | 190 | 7  | 0 | 1.249767  | 2.427845  | 4.139376  |
| 135 | 1 | 0 | 8.063207 | -4.563883 | 1.049544  | 191 | 7  | 0 | 1.334578  | 5.470024  | 0.223650  |
| 136 | 8 | 0 | 6.118321 | -4.312502 | 2.323504  | 192 | 7  | 0 | 1.298022  | 4.684139  | -2.350120 |
| 137 | 6 | 0 | 8.369534 | 1.426594  | -2.210673 | 193 | 1  | 0 | 9.279255  | 1.105995  | -1.710907 |
| 138 | 6 | 0 | 6.664615 | 3.078231  | -2.564115 | 194 | 1  | 0 | 9.175065  | 1.678231  | 1.019480  |
| 139 | 6 | 0 | 4.922850 | 4.943755  | -0.317862 | 195 | 1  | 0 | 9.251965  | -1.054375 | 1.680110  |
| 140 | 6 | 0 | 2.426669 | 1.847491  | 4.312870  | 196 | 1  | 0 | 9.158449  | -1.637261 | -1.023808 |
| 141 | 6 | 0 | 8.296960 | -2.197011 | -1.377678 | 197 | 6  | 0 | 9.906018  | -0.811446 | -3.510577 |
| 142 | 6 | 0 | 6.653595 | -3.908794 | -1.030701 | 198 | 1  | 0 | 10.298603 | -0.058035 | -4.200625 |
| 143 | 6 | 0 | 4.862951 | -4.467178 | 1.725898  | 199 | 6  | 0 | 9.924606  | -3.525764 | 0.778685  |
| 144 | 6 | 0 | 2.420584 | 0.387443  | 4.596461  | 200 | 1  | 0 | 10.334156 | -2.539400 | 0.537057  |
| 145 | 6 | 0 | 7.793472 | 0.575574  | -3.170832 | 201 | 1  | 0 | 10.296690 | -4.230263 | 0.028420  |
| 146 | 6 | 0 | 6.081442 | 2.282775  | -3.546820 | 202 | 6  | 0 | 9.909484  | 0.844386  | 3.505833  |
| 147 | 8 | 0 | 6.151460 | 4.371315  | -2.325488 | 203 | 1  | 0 | 10.326142 | 0.635603  | 2.514852  |
| 148 | 6 | 0 | 4.902174 | 4.539519  | -1.719198 | 204 | 1  | 0 | 10.292716 | 0.083814  | 4.193335  |
| 149 | 6 | 0 | 7.766242 | -1.881138 | -2.639962 | 205 | 6  | 0 | 9.958967  | 3.558544  | -0.792952 |
| 150 | 6 | 0 | 6.100456 | -3.634877 | -2.280162 | 206 | 1  | 0 | 10.359673 | 2.570573  | -0.543117 |
| 151 | 8 | 0 | 6.127510 | -4.991309 | -0.284428 | 207 | 1  | 0 | 10.338920 | 4.265543  | -0.049110 |
| 152 | 6 | 0 | 4.868208 | -4.858142 | 0.317683  | 208 | 52 | 0 | -0.172366 | 5.249916  | -1.096400 |
| 153 | 6 | 0 | 8.367641 | -0.794162 | -3.532203 | 209 | 52 | 0 | -0.274963 | 1.104989  | 4.362247  |
| 154 | 6 | 0 | 6.637461 | 1.034788  | -3.820772 | 210 | 52 | 0 | -0.274143 | -1.100266 | -4.305126 |
| 155 | 1 | 0 | 5.240223 | 2.649044  | -4.120514 | 211 | 52 | 0 | -0.226351 | -5.161395 | 1.154122  |
| 156 | 6 | 0 | 2.507269 | 5.185779  | -0.338260 | 212 | 1  | 0 | 10.318906 | -3.817056 | 1.757242  |
| 157 | 6 | 0 | 6.654357 | -2.625899 | -3.066165 | 213 | 1  | 0 | 10.322108 | -0.602318 | -2.519430 |
| 158 | 1 | 0 | 5.278355 | -4.232989 | -2.654097 | 214 | 1  | 0 | 10.284933 | 1.822430  | 3.822120  |
| 159 | 6 | 0 | 2.446052 | -4.674955 | 1.784829  | 215 | 1  | 0 | 10.354368 | 3.838259  | -1.774505 |
| 160 | 1 | 0 | 8.037745 | -1.010977 | -4.551875 | 216 | 1  | 0 | 10.272709 | -1.794717 | -3.820885 |
| 161 | 8 | 0 | 6.082834 | 0.244429  | -4.853510 | 217 | 6  | 0 | 5.801491  | 0.016252  | 0.198239  |
| 162 | 6 | 0 | 2.486779 | 4.752047  | -1.757536 | 218 | 6  | 0 | 4.591005  | 0.033525  | -0.747917 |
| 163 | 8 | 0 | 6.116928 | -2.404229 | -4.359902 | 219 | 1  | 0 | 6.728323  | 0.306671  | -0.310553 |
| 164 | 6 | 0 | 2.449892 | -5.100770 | 0.358625  | 220 | 1  | 0 | 5.654696  | 0.703513  | 1.042805  |
| 165 | 6 | 0 | 4.837124 | -0.356924 | -4.650650 | 221 | 1  | 0 | 5.948880  | -0.993207 | 0.606776  |
| 166 | 6 | 0 | 4.854308 | -1.798904 | -4.419966 | 222 | 6  | 0 | 3.364992  | -0.583058 | -0.045658 |
| 167 | 6 | 0 | 2.418092 | -0.360013 | -4.550713 | 223 | 1  | 0 | 4.373096  | 1.061753  | -1.071924 |
| 168 | 6 | 0 | 2.431123 | -1.834704 | -4.344784 | 224 | 1  | 0 | 4.820243  | -0.545587 | -1.656513 |
| 169 | 6 | 0 | 3.733853 | 4.447005  | -2.417870 | 225 | 1  | 0 | 3.594146  | -1.630092 | 0.201056  |
| 170 | 6 | 0 | 3.776778 | 5.268383  | 0.348242  | 226 | 1  | 0 | 3.182139  | -0.064457 | 0.905156  |
| 171 | 6 | 0 | 3.694673 | 2.538177  | 4.231010  | 227 | 6  | 0 | 2.113278  | -0.519909 | -0.918634 |
| 172 | 6 | 0 | 3.678765 | -0.295560 | 4.785943  | 228 | 1  | 0 | 2.263117  | -0.999947 | -1.888860 |
| 173 | 6 | 0 | 3.669359 | 0.338448  | -4.729240 | 229 | 1  | 0 | 1.725966  | 0.494263  | -1.048361 |
| 174 | 6 | 0 | 3.704426 | -2.519648 | -4.300964 | 230 | 53 | 0 | 0.486465  | -1.648576 | 0.013446  |
| 175 | 6 | 0 | 3.702611 | -4.377143 | 2.435414  | 231 | 6  | 0 | -2.247477 | 1.221730  | -0.793964 |
| 176 | 6 | 0 | 3.715951 | -5.171510 | -0.342021 | 232 | 1  | 0 | -2.557323 | 2.093334  | -1.376163 |
| 177 | 1 | 0 | 3.719369 | 4.211366  | -3.475136 | 233 | 1  | 0 | -1.827745 | 0.445785  | -1.441253 |

|     |    |   |           |           |           |
|-----|----|---|-----------|-----------|-----------|
| 234 | 6  | 0 | -3.367193 | 0.709907  | 0.101518  |
| 235 | 6  | 0 | -4.613043 | 0.326988  | -0.719657 |
| 236 | 1  | 0 | -3.643503 | 1.489120  | 0.827649  |
| 237 | 1  | 0 | -3.013623 | -0.156523 | 0.676287  |
| 238 | 6  | 0 | -5.736441 | -0.160621 | 0.207225  |
| 239 | 1  | 0 | -4.962721 | 1.206180  | -1.285388 |
| 240 | 1  | 0 | -4.360047 | -0.447415 | -1.459084 |
| 241 | 1  | 0 | -6.665573 | -0.345474 | -0.344022 |
| 242 | 1  | 0 | -5.454900 | -1.092189 | 0.719208  |
| 243 | 1  | 0 | -5.941121 | 0.601730  | 0.971120  |
| 244 | 35 | 0 | -0.704269 | 1.871919  | 0.330621  |

|    |   |   |            |           |           |
|----|---|---|------------|-----------|-----------|
| 38 | 6 | 0 | -6.075017  | 1.979173  | 3.660809  |
| 39 | 8 | 0 | -6.114690  | 4.140302  | 2.563461  |
| 40 | 6 | 0 | -4.858101  | 4.346134  | 1.985900  |
| 41 | 6 | 0 | -7.805763  | -2.096597 | 2.472208  |
| 42 | 6 | 0 | -6.141396  | -3.823190 | 1.996944  |
| 43 | 8 | 0 | -6.167898  | -5.039058 | -0.089228 |
| 44 | 6 | 0 | -4.899445  | -4.865680 | -0.660613 |
| 45 | 6 | 0 | -8.398600  | -1.064714 | 3.433276  |
| 46 | 6 | 0 | -6.654594  | 0.727043  | 3.859541  |
| 47 | 1 | 0 | -5.231535  | 2.296163  | 4.259812  |
| 48 | 6 | 0 | -2.443253  | 5.130266  | 0.700533  |
| 49 | 6 | 0 | -6.689464  | -2.863515 | 2.846087  |
| 50 | 1 | 0 | -5.320412  | -4.445450 | 2.331733  |
| 51 | 6 | 0 | -2.452547  | -4.573929 | -2.066475 |
| 52 | 1 | 0 | -8.075749  | -1.354048 | 4.437184  |
| 53 | 8 | 0 | -6.122713  | -0.124866 | 4.853250  |
| 54 | 6 | 0 | -2.443204  | 4.546581  | 2.069475  |
| 55 | 8 | 0 | -6.146224  | -2.724573 | 4.146595  |
| 56 | 6 | 0 | -2.481401  | -5.083369 | -0.671156 |
| 57 | 6 | 0 | -4.871995  | -0.712351 | 4.630881  |
| 58 | 6 | 0 | -4.883652  | -2.124450 | 4.263051  |
| 59 | 6 | 0 | -2.450270  | -0.711246 | 4.606663  |
| 60 | 6 | 0 | -2.458034  | -2.155224 | 4.250982  |
| 61 | 6 | 0 | -3.699573  | 4.186141  | 2.685152  |
| 62 | 6 | 0 | -3.707784  | 5.263350  | 0.005430  |
| 63 | 6 | 0 | -3.667359  | 2.860730  | -4.166544 |
| 64 | 6 | 0 | -3.622601  | 0.025091  | -4.719467 |
| 65 | 6 | 0 | -3.707036  | -0.030721 | 4.810869  |
| 66 | 6 | 0 | -3.728836  | -2.829354 | 4.099214  |
| 67 | 6 | 0 | -3.697764  | -4.242421 | -2.719523 |
| 68 | 6 | 0 | -3.756867  | -5.216574 | -0.002786 |
| 69 | 1 | 0 | -3.696349  | 3.853602  | 3.716048  |
| 70 | 1 | 0 | -3.721624  | 5.713512  | -0.980416 |
| 71 | 1 | 0 | -3.690818  | 1.001015  | 5.138999  |
| 72 | 1 | 0 | -3.684772  | 3.931054  | -3.999912 |
| 73 | 1 | 0 | -3.736298  | -3.890575 | 3.881661  |
| 74 | 1 | 0 | -3.592381  | -1.022694 | -4.990865 |
| 75 | 1 | 0 | -3.677035  | -3.948475 | -3.761997 |
| 76 | 1 | 0 | -3.785594  | -5.634804 | 0.996312  |
| 77 | 7 | 0 | -1.279915  | -2.735312 | 4.076897  |
| 78 | 7 | 0 | -1.269399  | -0.124352 | 4.714207  |
| 79 | 7 | 0 | -1.312734  | -5.387645 | -0.115330 |
| 80 | 7 | 0 | -1.261315  | -4.467287 | -2.644392 |
| 81 | 7 | 0 | -1.193363  | 0.127576  | -4.523602 |
| 82 | 7 | 0 | -1.225424  | 2.767462  | -4.019577 |
| 83 | 7 | 0 | -1.267932  | 5.481451  | 0.195478  |
| 84 | 7 | 0 | -1.269377  | 4.404783  | 2.664905  |
| 85 | 1 | 0 | -9.256159  | 0.949126  | 1.710144  |
| 86 | 1 | 0 | -9.096958  | 1.697306  | -0.941211 |
| 87 | 1 | 0 | -9.248046  | -0.963872 | -1.811081 |
| 88 | 1 | 0 | -9.201124  | -1.748766 | 0.878837  |
| 89 | 6 | 0 | -9.937107  | -1.059909 | 3.404900  |
| 90 | 1 | 0 | -10.318477 | -2.055813 | 3.650874  |
| 91 | 1 | 0 | -10.345848 | -0.781978 | 2.427653  |
| 92 | 6 | 0 | -9.942624  | -3.478489 | -1.085229 |
| 93 | 1 | 0 | -10.348238 | -2.509251 | -0.776510 |

RI-RBr@A<sub>Se</sub>+A<sub>Te</sub>

| Atom | Atomic Type | Coordinates (Angstroms) |           |           |           |
|------|-------------|-------------------------|-----------|-----------|-----------|
|      |             | X                       | Y         | Z         |           |
| 1    | 6           | 0                       | -8.324415 | 1.053913  | -3.502725 |
| 2    | 6           | 0                       | -7.722035 | 2.080421  | -2.543128 |
| 3    | 6           | 0                       | -7.756314 | -0.337335 | -3.226147 |
| 4    | 1           | 0                       | -7.991941 | 1.333394  | -4.506103 |
| 5    | 6           | 0                       | -8.246687 | 2.295098  | -1.257837 |
| 6    | 6           | 0                       | -6.622233 | 2.868219  | -2.919816 |
| 7    | 6           | 0                       | -8.339811 | -1.252296 | -2.332668 |
| 8    | 6           | 0                       | -6.592749 | -0.748101 | -3.895444 |
| 9    | 6           | 0                       | -7.739311 | 3.256520  | -0.368325 |
| 10   | 6           | 0                       | -6.077235 | 3.825332  | -2.064162 |
| 11   | 8           | 0                       | -6.078839 | 2.743000  | -4.224607 |
| 12   | 6           | 0                       | -7.797316 | -2.526248 | -2.085072 |
| 13   | 6           | 0                       | -6.040297 | -2.012404 | -3.707023 |
| 14   | 8           | 0                       | -6.034689 | 0.120017  | -4.860022 |
| 15   | 6           | 0                       | -8.368777 | 3.493370  | 1.003103  |
| 16   | 6           | 0                       | -6.629285 | 4.004816  | -0.796636 |
| 17   | 1           | 0                       | -5.261687 | 4.457161  | -2.395898 |
| 18   | 6           | 0                       | -4.815144 | 2.142136  | -4.316794 |
| 19   | 6           | 0                       | -8.404858 | -3.513559 | -1.089620 |
| 20   | 6           | 0                       | -6.633472 | -2.876348 | -2.788335 |
| 21   | 1           | 0                       | -5.193621 | -2.339030 | -4.296507 |
| 22   | 6           | 0                       | -4.793082 | 0.711809  | -4.613594 |
| 23   | 1           | 0                       | -8.049972 | 4.487624  | 1.327128  |
| 24   | 6           | 0                       | -7.798150 | 2.498390  | 2.008953  |
| 25   | 8           | 0                       | -6.116602 | 5.042214  | 0.020606  |
| 26   | 6           | 0                       | -7.811606 | -3.279213 | 0.299737  |
| 27   | 1           | 0                       | -8.085613 | -4.511395 | -1.402545 |
| 28   | 8           | 0                       | -6.116240 | -4.182557 | -2.642530 |
| 29   | 6           | 0                       | -8.359340 | 1.233186  | 2.253279  |
| 30   | 6           | 0                       | -6.639345 | 2.840247  | 2.723231  |
| 31   | 6           | 0                       | -4.860038 | 4.871614  | 0.622395  |
| 32   | 6           | 0                       | -2.391244 | 2.181791  | -4.234581 |
| 33   | 6           | 0                       | -8.339127 | -2.330909 | 1.193271  |
| 34   | 6           | 0                       | -6.693631 | -4.011319 | 0.731431  |
| 35   | 6           | 0                       | -4.870336 | -4.381873 | -2.036869 |
| 36   | 6           | 0                       | -2.373853 | 0.718258  | -4.505383 |
| 37   | 6           | 0                       | -7.806791 | 0.319887  | 3.168370  |

|     |    |   |            |           |           |     |   |   |           |           |           |
|-----|----|---|------------|-----------|-----------|-----|---|---|-----------|-----------|-----------|
| 94  | 1  | 0 | -10.331149 | -4.233215 | -0.394498 | 150 | 6 | 0 | 6.071495  | -4.144976 | -1.293718 |
| 95  | 6  | 0 | -9.863064  | 1.075672  | -3.483150 | 151 | 8 | 0 | 6.057003  | -4.900791 | 1.000644  |
| 96  | 1  | 0 | -10.282136 | 0.814689  | -2.505638 | 152 | 6 | 0 | 4.795649  | -4.603112 | 1.531557  |
| 97  | 1  | 0 | -10.256876 | 0.362363  | -4.214089 | 153 | 6 | 0 | 8.336624  | -1.686462 | -3.200355 |
| 98  | 6  | 0 | -9.906169  | 3.473104  | 0.953463  | 154 | 6 | 0 | 6.595413  | -0.002343 | -3.918248 |
| 99  | 1  | 0 | -10.312124 | 2.508109  | 0.632220  | 155 | 1 | 0 | 5.192672  | 1.476441  | -4.622353 |
| 100 | 1  | 0 | -10.267418 | 4.232458  | 0.253022  | 156 | 6 | 0 | 2.480208  | 4.938109  | -1.614947 |
| 101 | 52 | 0 | 0.207579   | -5.087979 | -1.409716 | 157 | 6 | 0 | 6.631196  | -3.373110 | -2.312009 |
| 102 | 52 | 0 | 0.243931   | -1.430165 | 4.396636  | 158 | 1 | 0 | 5.266073  | -4.836952 | -1.510989 |
| 103 | 52 | 0 | 0.313673   | 1.449846  | -4.201359 | 159 | 6 | 0 | 2.370856  | -4.008389 | 2.840856  |
| 104 | 52 | 0 | 0.231108   | 5.073262  | 1.495802  | 160 | 1 | 0 | 8.018946  | -2.145155 | -4.140466 |
| 105 | 1  | 0 | -10.324868 | -3.693043 | -2.088219 | 161 | 8 | 0 | 6.052426  | -1.041494 | -4.706371 |
| 106 | 1  | 0 | -10.225325 | 2.075733  | -3.740611 | 162 | 6 | 0 | 2.448420  | 4.081711  | -2.805074 |
| 107 | 1  | 0 | -10.322739 | -0.346456 | 4.139953  | 163 | 8 | 0 | 6.109383  | -3.514614 | -3.625503 |
| 108 | 1  | 0 | -10.314478 | 3.690404  | 1.945530  | 164 | 6 | 0 | 2.388437  | -4.811534 | 1.611635  |
| 109 | 6  | 0 | 8.297917   | 1.743408  | 3.218240  | 165 | 6 | 0 | 4.815338  | -1.595427 | -4.379156 |
| 110 | 6  | 0 | 7.717960   | 2.572103  | 2.072153  | 166 | 6 | 0 | 4.844577  | -2.955386 | -3.851758 |
| 111 | 6  | 0 | 7.706079   | 0.334991  | 3.210559  | 167 | 6 | 0 | 2.408297  | -1.629408 | -4.325652 |
| 112 | 1  | 0 | 7.965116   | 2.217510  | 4.145530  | 168 | 6 | 0 | 2.431270  | -3.016021 | -3.839969 |
| 113 | 6  | 0 | 8.262854   | 2.547339  | 0.777597  | 169 | 6 | 0 | 3.675653  | 3.599663  | -3.376843 |
| 114 | 6  | 0 | 6.606807   | 3.405923  | 2.279076  | 170 | 6 | 0 | 3.746149  | 5.246667  | -1.000609 |
| 115 | 6  | 0 | 8.264358   | -0.731880 | 2.485406  | 171 | 6 | 0 | 3.634818  | 3.633000  | 3.518098  |
| 116 | 6  | 0 | 6.548467   | 0.066052  | 3.956802  | 172 | 6 | 0 | 3.596356  | 1.004024  | 4.724104  |
| 117 | 6  | 0 | 7.760037   | 3.315014  | -0.286553 | 173 | 6 | 0 | 3.638954  | -0.949537 | -4.623613 |
| 118 | 6  | 0 | 6.084042   | 4.197004  | 1.257230  | 174 | 6 | 0 | 3.699993  | -3.664223 | -3.622996 |
| 119 | 8  | 0 | 6.048277   | 3.521139  | 3.577149  | 175 | 6 | 0 | 3.605967  | -3.545447 | 3.414364  |
| 120 | 6  | 0 | 7.705404   | -2.021150 | 2.480233  | 176 | 6 | 0 | 3.648748  | -5.090431 | 0.969330  |
| 121 | 6  | 0 | 5.972584   | -1.202484 | 3.997975  | 177 | 1 | 0 | 3.650272  | 3.060006  | -4.315468 |
| 122 | 8  | 0 | 6.008946   | 1.094995  | 4.761937  | 178 | 1 | 0 | 3.782731  | 5.905208  | -0.141050 |
| 123 | 6  | 0 | 8.375308   | 3.260079  | -1.685020 | 179 | 1 | 0 | 3.606785  | 0.035250  | -5.072278 |
| 124 | 6  | 0 | 6.654634   | 4.138091  | -0.013459 | 180 | 1 | 0 | 3.654452  | 4.639506  | 3.117951  |
| 125 | 1  | 0 | 5.269410   | 4.882885  | 1.458064  | 181 | 1 | 0 | 3.730289  | -4.695961 | -3.294015 |
| 126 | 6  | 0 | 4.786625   | 2.956637  | 3.802121  | 182 | 1 | 0 | 3.577851  | 0.053801  | 5.242826  |
| 127 | 6  | 0 | 8.291747   | -3.189947 | 1.693965  | 183 | 1 | 0 | 3.591704  | -3.041104 | 4.372800  |
| 128 | 6  | 0 | 6.544408   | -2.222945 | 3.241957  | 184 | 1 | 0 | 3.678919  | -5.721901 | 0.089212  |
| 129 | 1  | 0 | 5.129585   | -1.404607 | 4.645840  | 185 | 7 | 0 | 1.237884  | -3.545586 | -3.581149 |
| 130 | 6  | 0 | 4.766488   | 1.636851  | 4.422245  | 186 | 7 | 0 | 1.200274  | -1.091286 | -4.440833 |
| 131 | 1  | 0 | 8.064655   | 4.172797  | -2.200706 | 187 | 7 | 0 | 1.192404  | -5.222083 | 1.187346  |
| 132 | 6  | 0 | 7.780074   | 2.089337  | -2.467023 | 188 | 7 | 0 | 1.164987  | -3.787098 | 3.358859  |
| 133 | 8  | 0 | 6.151962   | 5.005369  | -1.017260 | 189 | 7 | 0 | 1.149683  | 1.130689  | 4.578619  |
| 134 | 6  | 0 | 7.690599   | -3.230639 | 0.290390  | 190 | 7 | 0 | 1.172708  | 3.505029  | 3.528384  |
| 135 | 1  | 0 | 7.968480   | -4.103543 | 2.199923  | 191 | 7 | 0 | 1.285931  | 5.347475  | -1.176311 |
| 136 | 8  | 0 | 6.019147   | -3.531561 | 3.328571  | 192 | 7 | 0 | 1.230820  | 3.823096  | -3.283474 |
| 137 | 6  | 0 | 8.336288   | 0.797669  | -2.475504 | 193 | 1 | 0 | 9.251953  | 0.619847  | -1.918962 |
| 138 | 6  | 0 | 6.614107   | 2.291057  | -3.222447 | 194 | 1 | 0 | 9.116956  | 1.902554  | 0.589628  |
| 139 | 6  | 0 | 4.885403   | 4.727076  | -1.548416 | 195 | 1 | 0 | 9.166928  | -0.552552 | 1.908389  |
| 140 | 6  | 0 | 2.372618   | 2.995273  | 3.794583  | 196 | 1 | 0 | 9.058622  | -1.812536 | -0.556393 |
| 141 | 6  | 0 | 8.216036   | -2.466483 | -0.763283 | 197 | 6 | 0 | 9.874673  | -1.700168 | -3.155786 |
| 142 | 6  | 0 | 6.592090   | -4.056684 | -0.004085 | 198 | 1 | 0 | 10.278723 | -1.128206 | -3.997013 |
| 143 | 6  | 0 | 4.775504   | -3.837450 | 2.773613  | 199 | 6 | 0 | 9.830107  | -3.173820 | 1.669298  |
| 144 | 6  | 0 | 2.357020   | 1.653368  | 4.392795  | 200 | 1 | 0 | 10.241838 | -2.288244 | 1.173976  |
| 145 | 6  | 0 | 7.760740   | -0.271336 | -3.184635 | 201 | 1 | 0 | 10.204616 | -4.053633 | 1.137148  |
| 146 | 6  | 0 | 6.031896   | 1.270287  | -3.971228 | 202 | 6 | 0 | 9.836777  | 1.733758  | 3.209501  |
| 147 | 8  | 0 | 6.094582   | 3.600206  | -3.311595 | 203 | 1 | 0 | 10.257101 | 1.276457  | 2.307600  |
| 148 | 6  | 0 | 4.852123   | 3.918096  | -2.760063 | 204 | 1 | 0 | 10.212301 | 1.172797  | 4.070992  |
| 149 | 6  | 0 | 7.718601   | -2.517181 | -2.076460 | 205 | 6 | 0 | 9.912708  | 3.227081  | -1.648183 |

|     |    |   |           |           |           |    |   |   |           |           |           |
|-----|----|---|-----------|-----------|-----------|----|---|---|-----------|-----------|-----------|
| 206 | 1  | 0 | 10.310858 | 2.343971  | -1.137497 | 10 | 6 | 0 | -6.076872 | -3.057196 | -2.941822 |
| 207 | 1  | 0 | 10.291915 | 4.109469  | -1.123791 | 11 | 8 | 0 | -6.104397 | -4.807568 | -1.275529 |
| 208 | 34 | 0 | -0.062394 | 4.695273  | -2.278443 | 12 | 6 | 0 | -7.753260 | -1.217562 | 3.010277  |
| 209 | 34 | 0 | -0.182396 | 2.323513  | 4.049072  | 13 | 6 | 0 | -6.047036 | -2.973884 | 3.029972  |
| 210 | 34 | 0 | -0.123401 | -2.322687 | -3.979995 | 14 | 8 | 0 | -6.111121 | -4.776103 | 1.418567  |
| 211 | 34 | 0 | -0.145937 | -4.620309 | 2.339597  | 15 | 6 | 0 | -8.382540 | -0.046653 | -3.587784 |
| 212 | 1  | 0 | 10.220207 | -3.192753 | 2.691709  | 16 | 6 | 0 | -6.644198 | -1.911425 | -3.498802 |
| 213 | 1  | 0 | 10.280760 | -1.268160 | -2.235114 | 17 | 1 | 0 | -5.248562 | -3.554356 | -3.431364 |
| 214 | 1  | 0 | 10.217101 | 2.758173  | 3.267762  | 18 | 6 | 0 | -4.848939 | -4.838224 | -0.654061 |
| 215 | 1  | 0 | 10.312136 | 3.229030  | -2.667237 | 19 | 6 | 0 | -8.348061 | 0.045986  | 3.635502  |
| 216 | 1  | 0 | 10.240513 | -2.728968 | -3.226250 | 20 | 6 | 0 | -6.606343 | -1.812371 | 3.560676  |
| 217 | 6  | 0 | 5.663294  | 0.281518  | 0.148469  | 21 | 1 | 0 | -5.200336 | -3.445133 | 3.512860  |
| 218 | 6  | 0 | 4.628697  | -0.424898 | -0.740584 | 22 | 6 | 0 | -4.851970 | -4.824130 | 0.807537  |
| 219 | 1  | 0 | 6.650790  | 0.315402  | -0.326936 | 23 | 1 | 0 | -8.048826 | -0.051890 | -4.629205 |
| 220 | 1  | 0 | 5.355808  | 1.315792  | 0.361406  | 24 | 6 | 0 | -7.835734 | 1.239033  | -2.964789 |
| 221 | 1  | 0 | 5.774139  | -0.243304 | 1.108047  | 25 | 8 | 0 | -6.102792 | -1.411561 | -4.710092 |
| 222 | 6  | 0 | 3.295701  | -0.608966 | 0.010936  | 26 | 6 | 0 | -7.798140 | 1.308755  | 2.967240  |
| 223 | 1  | 0 | 4.463342  | 0.159056  | -1.658766 | 27 | 1 | 0 | -7.999763 | 0.070250  | 4.672027  |
| 224 | 1  | 0 | 5.014697  | -1.408200 | -1.052429 | 28 | 8 | 0 | -6.040086 | -1.269970 | 4.738757  |
| 225 | 1  | 0 | 3.463319  | -1.246517 | 0.891486  | 29 | 6 | 0 | -8.429605 | 1.874564  | -1.859606 |
| 226 | 1  | 0 | 2.944096  | 0.363148  | 0.380893  | 30 | 6 | 0 | -6.686364 | 1.840273  | -3.503274 |
| 227 | 6  | 0 | 2.228883  | -1.232769 | -0.886896 | 31 | 6 | 0 | -4.848934 | -0.790892 | -4.622570 |
| 228 | 1  | 0 | 2.527656  | -2.219458 | -1.254667 | 32 | 6 | 0 | -2.438013 | -5.141933 | -0.656827 |
| 229 | 1  | 0 | 1.955891  | -0.580558 | -1.721596 | 33 | 6 | 0 | -8.386296 | 1.901400  | 1.835711  |
| 230 | 53 | 0 | 0.378151  | -1.566299 | 0.221222  | 34 | 6 | 0 | -6.655709 | 1.935837  | 3.491914  |
| 231 | 6  | 0 | -2.361935 | 1.133058  | -1.014044 | 35 | 6 | 0 | -4.790113 | -0.647874 | 4.617945  |
| 232 | 1  | 0 | -2.708280 | 1.916269  | -1.691836 | 36 | 6 | 0 | -2.440471 | -5.124799 | 0.831258  |
| 233 | 1  | 0 | -1.926271 | 0.297232  | -1.570030 | 37 | 6 | 0 | -7.908526 | 3.043079  | -1.274844 |
| 234 | 6  | 0 | -3.448621 | 0.702937  | -0.039482 | 38 | 6 | 0 | -6.160892 | 3.021661  | -2.984434 |
| 235 | 6  | 0 | -4.678472 | 0.162604  | -0.793537 | 39 | 8 | 0 | -6.105673 | 1.280518  | -4.664468 |
| 236 | 1  | 0 | -3.751904 | 1.561957  | 0.576702  | 40 | 6 | 0 | -4.851551 | 0.668144  | -4.566564 |
| 237 | 1  | 0 | -3.060546 | -0.064237 | 0.643851  | 41 | 6 | 0 | -7.881472 | 3.064891  | 1.225707  |
| 238 | 6  | 0 | -5.790277 | -0.228167 | 0.190138  | 42 | 6 | 0 | -6.137300 | 3.103810  | 2.937348  |
| 239 | 1  | 0 | -5.054759 | 0.936040  | -1.482439 | 43 | 8 | 0 | -6.061500 | 1.417665  | 4.666224  |
| 240 | 1  | 0 | -4.395077 | -0.702546 | -1.411632 | 44 | 6 | 0 | -4.802567 | 0.811239  | 4.564369  |
| 241 | 1  | 0 | -6.698587 | -0.539082 | -0.337508 | 45 | 6 | 0 | -8.511186 | 3.685114  | -0.024233 |
| 242 | 1  | 0 | -5.474546 | -1.057380 | 0.839247  | 46 | 6 | 0 | -6.760539 | 3.597225  | -1.866022 |
| 243 | 1  | 0 | -6.052725 | 0.625897  | 0.829027  | 47 | 1 | 0 | -5.323318 | 3.509429  | -3.466520 |
| 244 | 35 | 0 | -0.816137 | 1.972832  | -0.020282 | 48 | 6 | 0 | -2.428237 | -0.814285 | -4.489087 |

RI-RI@As<sub>e</sub>+AT<sub>e</sub>

| Atom | Atomic Type | Coordinates (Angstroms) |           |           |           |
|------|-------------|-------------------------|-----------|-----------|-----------|
|      |             | X                       | Y         | Z         |           |
| 1    | 6           | 0                       | -8.371634 | -3.668011 | 0.069079  |
| 2    | 6           | 0                       | -7.765392 | -3.030599 | -1.179441 |
| 3    | 6           | 0                       | -7.777619 | -3.010816 | 1.311328  |
| 4    | 1           | 0                       | -8.047962 | -4.712342 | 0.077997  |
| 5    | 6           | 0                       | -8.300123 | -1.873317 | -1.771180 |
| 6    | 6           | 0                       | -6.628072 | -3.595111 | -1.781089 |
| 7    | 6           | 0                       | -8.315536 | -1.847106 | 1.886199  |
| 8    | 6           | 0                       | -6.625466 | -3.552159 | 1.904092  |
| 9    | 6           | 0                       | -7.767120 | -1.286277 | -2.932335 |

|    |   |   |           |           |           |
|----|---|---|-----------|-----------|-----------|
| 49 | 6 | 0 | -6.741853 | 3.646487  | 1.805317  |
| 50 | 1 | 0 | -5.302078 | 3.609658  | 3.405011  |
| 51 | 6 | 0 | -2.370146 | -0.655613 | 4.477389  |
| 52 | 1 | 0 | -8.213306 | 4.737228  | -0.036025 |
| 53 | 8 | 0 | -6.262698 | 4.829351  | -1.383770 |
| 54 | 6 | 0 | -2.433394 | 0.673244  | -4.422704 |
| 55 | 8 | 0 | -6.254446 | 4.876124  | 1.300986  |
| 56 | 6 | 0 | -2.382942 | 0.833500  | 4.423120  |
| 57 | 6 | 0 | -5.001915 | 4.887767  | -0.777731 |
| 58 | 6 | 0 | -4.998408 | 4.918544  | 0.681921  |
| 59 | 6 | 0 | -2.589728 | 5.162330  | -0.802446 |
| 60 | 6 | 0 | -2.586470 | 5.194511  | 0.685229  |
| 61 | 6 | 0 | -3.692971 | 1.379028  | -4.490151 |
| 62 | 6 | 0 | -3.690992 | -1.507779 | -4.613861 |
| 63 | 6 | 0 | -3.694123 | -4.998922 | -1.362466 |
| 64 | 6 | 0 | -3.700979 | -4.968576 | 1.525311  |
| 65 | 6 | 0 | -3.850293 | 5.016186  | -1.497370 |

|     |    |   |            |           |           |     |   |   |          |           |           |
|-----|----|---|------------|-----------|-----------|-----|---|---|----------|-----------|-----------|
| 66  | 6  | 0 | -3.844279  | 5.079390  | 1.390497  | 122 | 8 | 0 | 6.058035 | 4.450666  | -2.524968 |
| 67  | 6  | 0 | -3.628617  | -1.357597 | 4.594010  | 123 | 6 | 0 | 8.388367 | -2.625045 | -2.548817 |
| 68  | 6  | 0 | -3.648877  | 1.530269  | 4.487516  | 124 | 6 | 0 | 6.583341 | -1.264866 | -3.679949 |
| 69  | 1  | 0 | -3.681432  | 2.461864  | -4.498950 | 125 | 1 | 0 | 5.104579 | -0.103697 | -4.731517 |
| 70  | 1  | 0 | -3.687543  | -2.586782 | -4.707957 | 126 | 6 | 0 | 4.743572 | 2.778042  | -3.693832 |
| 71  | 1  | 0 | -3.857852  | 5.060087  | -2.579847 | 127 | 6 | 0 | 8.350440 | 2.685623  | 2.465176  |
| 72  | 1  | 0 | -3.699828  | -5.077503 | -2.443291 | 128 | 6 | 0 | 6.622610 | 3.997327  | 1.092150  |
| 73  | 1  | 0 | -3.848850  | 5.165580  | 2.470396  | 129 | 1 | 0 | 5.251069 | 5.114227  | -0.132476 |
| 74  | 1  | 0 | -3.711412  | -5.020730 | 2.607531  | 130 | 6 | 0 | 4.782141 | 3.979750  | -2.867840 |
| 75  | 1  | 0 | -3.616041  | -2.436523 | 4.685984  | 131 | 1 | 0 | 8.063520 | -3.349456 | -3.301032 |
| 76  | 1  | 0 | -3.645981  | 2.613206  | 4.504105  | 132 | 6 | 0 | 7.804462 | -3.090850 | -1.212632 |
| 77  | 7  | 0 | -1.406695  | 5.311487  | 1.284930  | 133 | 8 | 0 | 6.053231 | -2.499961 | -4.106376 |
| 78  | 7  | 0 | -1.412323  | 5.257674  | -1.410691 | 134 | 6 | 0 | 7.784105 | 1.324873  | 2.873976  |
| 79  | 7  | 0 | -1.213196  | 1.435391  | 4.317895  | 135 | 1 | 0 | 8.022459 | 3.402403  | 3.223197  |
| 80  | 7  | 0 | -1.191412  | -1.247544 | 4.412377  | 136 | 8 | 0 | 6.073660 | 4.549843  | 2.280199  |
| 81  | 7  | 0 | -1.267176  | -5.248815 | 1.439368  | 137 | 6 | 0 | 8.341701 | -2.665541 | 0.015296  |
| 82  | 7  | 0 | -1.262850  | -5.283738 | -1.256864 | 138 | 6 | 0 | 6.692662 | -3.948717 | -1.151775 |
| 83  | 7  | 0 | -1.256378  | -1.416570 | -4.392291 | 139 | 6 | 0 | 4.815074 | -2.942596 | -3.643989 |
| 84  | 7  | 0 | -1.261296  | 1.265382  | -4.291726 | 140 | 6 | 0 | 2.337525 | 2.831793  | -3.648920 |
| 85  | 1  | 0 | -9.321835  | 1.432437  | -1.425255 | 141 | 6 | 0 | 8.377138 | 0.090523  | 2.550820  |
| 86  | 1  | 0 | -9.173635  | -1.416226 | -1.314549 | 142 | 6 | 0 | 6.587070 | 1.290221  | 3.606168  |
| 87  | 1  | 0 | -9.204766  | -1.412367 | 1.438361  | 143 | 6 | 0 | 4.804481 | 4.092617  | 2.663857  |
| 88  | 1  | 0 | -9.270016  | 1.435396  | 1.408588  | 144 | 6 | 0 | 2.366754 | 4.082131  | -2.874884 |
| 89  | 6  | 0 | -10.047396 | 3.617504  | -0.005894 | 145 | 6 | 0 | 7.819183 | -3.035399 | 1.266888  |
| 90  | 1  | 0 | -10.433307 | 4.126683  | 0.882687  | 146 | 6 | 0 | 6.156385 | -4.361951 | 0.066752  |
| 91  | 1  | 0 | -10.430872 | 2.591874  | 0.009063  | 147 | 8 | 0 | 6.137676 | -4.499390 | -2.336836 |
| 92  | 6  | 0 | -9.886755  | 0.018636  | 3.645523  | 148 | 6 | 0 | 4.860356 | -4.066117 | -2.717262 |
| 93  | 1  | 0 | -10.319831 | -0.003680 | 2.639881  | 149 | 6 | 0 | 7.811848 | -1.144284 | 2.921753  |
| 94  | 1  | 0 | -10.273381 | 0.908417  | 4.152231  | 150 | 6 | 0 | 6.014220 | 0.095278  | 4.031449  |
| 95  | 6  | 0 | -9.909348  | -3.640144 | 0.058810  | 151 | 8 | 0 | 6.029753 | 2.518540  | 4.014833  |
| 96  | 1  | 0 | -10.320028 | -2.625098 | 0.050942  | 152 | 6 | 0 | 4.782775 | 2.941499  | 3.558610  |
| 97  | 1  | 0 | -10.297402 | -4.146537 | 0.948146  | 153 | 6 | 0 | 8.417605 | -2.507830 | 2.573297  |
| 98  | 6  | 0 | -9.920951  | -0.092528 | -3.576750 | 154 | 6 | 0 | 6.707972 | -3.897088 | 1.258708  |
| 99  | 1  | 0 | -10.341043 | -0.099146 | -2.565447 | 155 | 1 | 0 | 5.337746 | -5.072249 | 0.085572  |
| 100 | 1  | 0 | -10.270914 | -0.996346 | -4.085078 | 156 | 6 | 0 | 2.408882 | -3.037588 | -3.642995 |
| 101 | 1  | 0 | -10.241855 | -0.869132 | 4.178072  | 157 | 6 | 0 | 6.621922 | -1.103323 | 3.665307  |
| 102 | 1  | 0 | -10.286804 | -4.156076 | -0.829590 | 158 | 1 | 0 | 5.152906 | 0.098744  | 4.685042  |
| 103 | 1  | 0 | -10.454216 | 4.109758  | -0.894778 | 159 | 6 | 0 | 2.388605 | 4.202860  | 2.722235  |
| 104 | 1  | 0 | -10.325510 | 0.780696  | -4.098124 | 160 | 1 | 0 | 8.104770 | -3.198123 | 3.361776  |
| 105 | 52 | 0 | 0.324268   | 0.107288  | 4.305285  | 161 | 8 | 0 | 6.172274 | -4.395602 | 2.474921  |
| 106 | 52 | 0 | 0.085508   | 5.452360  | -0.068656 | 162 | 6 | 0 | 2.448106 | -4.203641 | -2.751106 |
| 107 | 52 | 0 | 0.229534   | -5.436676 | 0.093475  | 163 | 8 | 0 | 6.102266 | -2.320936 | 4.151971  |
| 108 | 52 | 0 | 0.268558   | -0.071275 | -4.250233 | 164 | 6 | 0 | 2.376513 | 3.004961  | 3.573858  |
| 109 | 6  | 0 | 8.325565   | 2.568375  | -2.648970 | 165 | 6 | 0 | 4.897462 | -3.951900 | 2.850888  |
| 110 | 6  | 0 | 7.757050   | 1.192588  | -3.000804 | 166 | 6 | 0 | 4.860141 | -2.786750 | 3.726818  |
| 111 | 6  | 0 | 7.717177   | 3.074147  | -1.338513 | 167 | 6 | 0 | 2.485245 | -4.087668 | 2.912743  |
| 112 | 1  | 0 | 7.992657   | 3.254894  | -3.432572 | 168 | 6 | 0 | 2.455197 | -2.880641 | 3.750728  |
| 113 | 6  | 0 | 8.354551   | -0.028660 | -2.638095 | 169 | 6 | 0 | 3.724312 | -4.701413 | -2.299231 |
| 114 | 6  | 0 | 6.551121   | 1.128935  | -3.716612 | 170 | 6 | 0 | 3.632281 | -2.438613 | -4.101907 |
| 115 | 6  | 0 | 8.240590   | 2.690255  | -0.092318 | 171 | 6 | 0 | 3.562956 | 2.208737  | -4.071648 |
| 116 | 6  | 0 | 6.613480   | 3.944544  | -1.318486 | 172 | 6 | 0 | 3.644281 | 4.632325  | -2.486943 |
| 117 | 6  | 0 | 7.782760   | -1.276779 | -2.950926 | 173 | 6 | 0 | 3.758860 | -4.606074 | 2.473225  |
| 118 | 6  | 0 | 5.973232   | -0.081284 | -4.088163 | 174 | 6 | 0 | 3.682434 | -2.262358 | 4.172744  |
| 119 | 8  | 0 | 5.983046   | 2.340969  | -4.155399 | 175 | 6 | 0 | 3.657371 | 4.723095  | 2.269734  |
| 120 | 6  | 0 | 7.731669   | 3.134979  | 1.140060  | 176 | 6 | 0 | 3.610086 | 2.403384  | 4.001793  |
| 121 | 6  | 0 | 6.072055   | 4.406263  | -0.120632 | 177 | 1 | 0 | 3.770456 | -5.579665 | -1.666427 |

|     |    |   |           |           |           |
|-----|----|---|-----------|-----------|-----------|
| 178 | 1  | 0 | 3.589845  | -1.653627 | -4.846187 |
| 179 | 1  | 0 | 3.798033  | -5.510089 | 1.877233  |
| 180 | 1  | 0 | 3.520143  | 1.356210  | -4.737298 |
| 181 | 1  | 0 | 3.646049  | -1.441867 | 4.877796  |
| 182 | 1  | 0 | 3.686901  | 5.557865  | -1.925175 |
| 183 | 1  | 0 | 3.688920  | 5.615747  | 1.656232  |
| 184 | 1  | 0 | 3.582749  | 1.593908  | 4.720051  |
| 185 | 7  | 0 | 1.242087  | -2.440578 | 4.069899  |
| 186 | 7  | 0 | 1.287780  | -4.585616 | 2.600397  |
| 187 | 7  | 0 | 1.170645  | 2.569919  | 3.920604  |
| 188 | 7  | 0 | 1.184249  | 4.694976  | 2.428035  |
| 189 | 7  | 0 | 1.171000  | 4.588545  | -2.577124 |
| 190 | 7  | 0 | 1.124698  | 2.376541  | -3.935701 |
| 191 | 7  | 0 | 1.190669  | -2.620790 | -3.979330 |
| 192 | 7  | 0 | 1.253415  | -4.692083 | -2.410049 |
| 193 | 1  | 0 | 9.196762  | -1.995727 | -0.004314 |
| 194 | 1  | 0 | 9.290456  | -0.006691 | -2.087273 |
| 195 | 1  | 0 | 9.082361  | 2.003172  | -0.079160 |
| 196 | 1  | 0 | 9.308551  | 0.091507  | 1.991726  |
| 197 | 6  | 0 | 9.955120  | -2.477750 | 2.542684  |
| 198 | 1  | 0 | 10.344643 | -3.480173 | 2.341004  |
| 199 | 6  | 0 | 9.888112  | 2.699163  | 2.424070  |
| 200 | 1  | 0 | 10.302813 | 2.012747  | 1.678387  |
| 201 | 1  | 0 | 10.291416 | 2.412431  | 3.400431  |
| 202 | 6  | 0 | 9.863573  | 2.581936  | -2.619405 |
| 203 | 1  | 0 | 10.282316 | 1.922959  | -1.851575 |
| 204 | 1  | 0 | 10.224132 | 3.594803  | -2.416181 |
| 205 | 6  | 0 | 9.926322  | -2.600197 | -2.537874 |
| 206 | 1  | 0 | 10.338388 | -1.896718 | -1.806845 |
| 207 | 1  | 0 | 10.302834 | -2.311046 | -3.524092 |
| 208 | 34 | 0 | -0.111182 | -3.716388 | -3.234183 |
| 209 | 34 | 0 | -0.191330 | 3.523721  | -3.296208 |
| 210 | 34 | 0 | -0.071677 | -3.560121 | 3.379253  |
| 211 | 34 | 0 | -0.158057 | 3.674826  | 3.242492  |
| 212 | 1  | 0 | 10.245701 | 3.704229  | 2.180753  |
| 213 | 1  | 0 | 10.355435 | -1.807035 | 1.775146  |
| 214 | 1  | 0 | 10.259707 | 2.258292  | -3.587146 |
| 215 | 1  | 0 | 10.314386 | -3.593919 | -2.294465 |
| 216 | 1  | 0 | 10.341936 | -2.141386 | 3.509810  |
| 217 | 6  | 0 | 6.067693  | 0.007607  | -0.048704 |
| 218 | 6  | 0 | 4.676840  | -0.596536 | 0.163833  |
| 219 | 1  | 0 | 6.864494  | -0.735450 | 0.021634  |
| 220 | 1  | 0 | 6.122936  | 0.475287  | -1.039753 |
| 221 | 1  | 0 | 6.263150  | 0.788053  | 0.696568  |
| 222 | 6  | 0 | 3.647515  | 0.544593  | 0.111559  |
| 223 | 1  | 0 | 4.461294  | -1.342138 | -0.616742 |
| 224 | 1  | 0 | 4.619345  | -1.115927 | 1.132568  |
| 225 | 1  | 0 | 3.835998  | 1.236873  | 0.945908  |
| 226 | 1  | 0 | 3.803402  | 1.117436  | -0.814666 |
| 227 | 6  | 0 | 2.213474  | 0.040302  | 0.162627  |
| 228 | 1  | 0 | 1.960710  | -0.456723 | 1.103523  |
| 229 | 1  | 0 | 1.960532  | -0.609519 | -0.678961 |
| 230 | 53 | 0 | 0.849720  | 1.731803  | 0.015153  |
| 231 | 6  | 0 | -2.409902 | -0.704718 | -0.980616 |
| 232 | 1  | 0 | -1.951876 | 0.258968  | -1.225635 |
| 233 | 1  | 0 | -2.587860 | -1.283881 | -1.890015 |

|     |    |   |           |           |           |
|-----|----|---|-----------|-----------|-----------|
| 234 | 6  | 0 | -3.652903 | -0.582015 | -0.107679 |
| 235 | 6  | 0 | -4.791216 | 0.183080  | -0.799013 |
| 236 | 1  | 0 | -3.396936 | -0.073564 | 0.831872  |
| 237 | 1  | 0 | -4.012301 | -1.585788 | 0.164045  |
| 238 | 6  | 0 | -6.016429 | 0.190432  | 0.122788  |
| 239 | 1  | 0 | -4.475256 | 1.210456  | -1.032945 |
| 240 | 1  | 0 | -5.044735 | -0.299886 | -1.755519 |
| 241 | 1  | 0 | -6.839458 | 0.771603  | -0.298478 |
| 242 | 1  | 0 | -6.380766 | -0.832960 | 0.281577  |
| 243 | 1  | 0 | -5.762494 | 0.623336  | 1.101029  |
| 244 | 53 | 0 | -0.892912 | -1.820276 | 0.118390  |

-----  
-----  
**RBr-RBr@A<sub>Te</sub>+A<sub>Te</sub>**  
-----

| Atom | Atomic Type | Coordinates (Angstroms) |          |           |           |
|------|-------------|-------------------------|----------|-----------|-----------|
|      |             | X                       | Y        | Z         |           |
| 1    | 6           | 0                       | 8.313323 | -1.096237 | -3.462960 |
| 2    | 6           | 0                       | 7.696891 | -2.115401 | -2.505099 |
| 3    | 6           | 0                       | 7.744926 | 0.298100  | -3.198073 |
| 4    | 1           | 0                       | 7.990967 | -1.379101 | -4.468767 |
| 5    | 6           | 0                       | 8.206039 | -2.323252 | -1.211415 |
| 6    | 6           | 0                       | 6.597276 | -2.898960 | -2.888943 |
| 7    | 6           | 0                       | 8.326125 | 1.220634  | -2.311581 |
| 8    | 6           | 0                       | 6.583688 | 0.705852  | -3.873627 |
| 9    | 6           | 0                       | 7.670549 | -3.261825 | -0.314976 |
| 10   | 6           | 0                       | 6.021576 | -3.829647 | -2.024203 |
| 11   | 8           | 0                       | 6.078840 | -2.799632 | -4.207267 |
| 12   | 6           | 0                       | 7.788520 | 2.500605  | -2.083779 |
| 13   | 6           | 0                       | 6.043709 | 1.979196  | -3.714680 |
| 14   | 8           | 0                       | 6.017452 | -0.179516 | -4.816788 |
| 15   | 6           | 0                       | 8.278774 | -3.507434 | 1.064600  |
| 16   | 6           | 0                       | 6.546258 | -3.987972 | -0.743817 |
| 17   | 1           | 0                       | 5.202798 | -4.454935 | -2.359748 |
| 18   | 6           | 0                       | 4.810883 | -2.209018 | -4.313326 |
| 19   | 6           | 0                       | 8.386859 | 3.487090  | -1.083354 |
| 20   | 6           | 0                       | 6.639012 | 2.854378  | -2.808066 |
| 21   | 1           | 0                       | 5.207847 | 2.306058  | -4.319524 |
| 22   | 6           | 0                       | 4.780645 | -0.771400 | -4.563617 |
| 23   | 1           | 0                       | 7.947342 | -4.499896 | 1.381370  |
| 24   | 6           | 0                       | 7.705378 | -2.511115 | 2.066670  |
| 25   | 8           | 0                       | 5.993611 | -4.983810 | 0.096871  |
| 26   | 6           | 0                       | 7.773199 | 3.255986  | 0.297968  |
| 27   | 1           | 0                       | 8.075891 | 4.485815  | -1.401700 |
| 28   | 8           | 0                       | 6.131662 | 4.168701  | -2.694620 |
| 29   | 6           | 0                       | 8.261742 | -1.240076 | 2.291449  |
| 30   | 6           | 0                       | 6.555942 | -2.851191 | 2.796051  |
| 31   | 6           | 0                       | 4.746987 | -4.771716 | 0.698377  |
| 32   | 6           | 0                       | 2.384734 | -2.267578 | -4.249594 |
| 33   | 6           | 0                       | 8.284292 | 2.310360  | 1.203140  |
| 34   | 6           | 0                       | 6.653124 | 3.995308  | 0.711599  |
| 35   | 6           | 0                       | 4.875250 | 4.368915  | -2.107898 |
| 36   | 6           | 0                       | 2.366156 | -0.792272 | -4.442264 |
| 37   | 6           | 0                       | 7.709090 | -0.316735 | 3.195278  |



|    |   |   |           |           |           |     |    |   |           |           |           |
|----|---|---|-----------|-----------|-----------|-----|----|---|-----------|-----------|-----------|
| 38 | 6 | 0 | 5.984332  | -1.974195 | 3.714532  | 94  | 1  | 0 | 10.305586 | 4.201767  | -0.362641 |
| 39 | 8 | 0 | 6.029670  | -4.157014 | 2.667900  | 95  | 6  | 0 | 9.851485  | -1.120168 | -3.427339 |
| 40 | 6 | 0 | 4.767535  | -4.335032 | 2.090145  | 96  | 1  | 0 | 10.261070 | -0.856177 | -2.446692 |
| 41 | 6 | 0 | 7.737041  | 2.092988  | 2.479573  | 97  | 1  | 0 | 10.254185 | -0.410506 | -4.156830 |
| 42 | 6 | 0 | 6.091285  | 3.827946  | 1.975214  | 98  | 6  | 0 | 9.817042  | -3.500917 | 1.035544  |
| 43 | 8 | 0 | 6.133899  | 5.005340  | -0.133065 | 99  | 1  | 0 | 10.236007 | -2.537448 | 0.726952  |
| 44 | 6 | 0 | 4.877163  | 4.816379  | -0.721760 | 100 | 1  | 0 | 10.181231 | -4.258726 | 0.335036  |
| 45 | 6 | 0 | 8.310373  | 1.064616  | 3.454308  | 101 | 1  | 0 | 10.321800 | 3.656432  | -2.054216 |
| 46 | 6 | 0 | 6.552992  | -0.713827 | 3.885894  | 102 | 1  | 0 | 10.214661 | -2.121649 | -3.677528 |
| 47 | 1 | 0 | 5.142717  | -2.286104 | 4.319350  | 103 | 1  | 0 | 10.219932 | 0.332920  | 4.186750  |
| 48 | 6 | 0 | 2.325751  | -4.938143 | 0.769879  | 104 | 1  | 0 | 10.209686 | -3.728718 | 2.031412  |
| 49 | 6 | 0 | 6.627581  | 2.875338  | 2.839283  | 105 | 52 | 0 | -0.260372 | 4.955439  | -1.519421 |
| 50 | 1 | 0 | 5.273387  | 4.460259  | 2.298147  | 106 | 52 | 0 | -0.374744 | 1.550826  | 4.308777  |
| 51 | 6 | 0 | 2.453746  | 4.542384  | -2.171422 | 107 | 52 | 0 | -0.363149 | -1.554012 | -4.214029 |
| 52 | 1 | 0 | 7.980808  | 1.365238  | 4.452669  | 108 | 52 | 0 | -0.385894 | -4.883266 | 1.592532  |
| 53 | 8 | 0 | 6.005719  | 0.160796  | 4.851319  | 109 | 6  | 0 | -8.342998 | -1.447511 | 3.290991  |
| 54 | 6 | 0 | 2.345989  | -4.489274 | 2.183918  | 110 | 6  | 0 | -7.757203 | -2.364972 | 2.217763  |
| 55 | 8 | 0 | 6.075918  | 2.758858  | 4.139533  | 111 | 6  | 0 | -7.740192 | -0.046361 | 3.184641  |
| 56 | 6 | 0 | 2.459070  | 4.986969  | -0.757647 | 112 | 1  | 0 | -8.022573 | -1.852081 | 4.255009  |
| 57 | 6 | 0 | 4.769189  | 0.760262  | 4.595373  | 113 | 6  | 0 | -8.287386 | -2.432056 | 0.917629  |
| 58 | 6 | 0 | 4.805180  | 2.175305  | 4.246058  | 114 | 6  | 0 | -6.654059 | -3.187805 | 2.499301  |
| 59 | 6 | 0 | 2.350029  | 0.790023  | 4.528718  | 115 | 6  | 0 | -8.288751 | 0.975205  | 2.389953  |
| 60 | 6 | 0 | 2.378078  | 2.239691  | 4.208394  | 116 | 6  | 0 | -6.581292 | 0.264312  | 3.913445  |
| 61 | 6 | 0 | 3.617150  | -4.205707 | 2.810537  | 117 | 6  | 0 | -7.765625 | -3.266634 | -0.084838 |
| 62 | 6 | 0 | 3.576458  | -5.067766 | 0.057308  | 118 | 6  | 0 | -6.106354 | -4.033135 | 1.535895  |
| 63 | 6 | 0 | 3.666932  | -2.938850 | -4.197707 | 119 | 8  | 0 | -6.117311 | -3.229985 | 3.810953  |
| 64 | 6 | 0 | 3.607151  | -0.081327 | -4.628442 | 120 | 6  | 0 | -7.721082 | 2.258435  | 2.304271  |
| 65 | 6 | 0 | 3.591814  | 0.087972  | 4.740153  | 121 | 6  | 0 | -6.003789 | 1.531847  | 3.882767  |
| 66 | 6 | 0 | 3.660652  | 2.897610  | 4.082644  | 122 | 8  | 0 | -6.043538 | -0.717189 | 4.774294  |
| 67 | 6 | 0 | 3.713912  | 4.247211  | -2.814583 | 123 | 6  | 0 | -8.364601 | -3.335871 | -1.489683 |
| 68 | 6 | 0 | 3.718333  | 5.125649  | -0.067629 | 124 | 6  | 0 | -6.650446 | -4.050417 | 0.253675  |
| 69 | 1 | 0 | 3.633863  | -3.953938 | 3.864693  | 125 | 1  | 0 | -5.292350 | -4.699310 | 1.794626  |
| 70 | 1 | 0 | 3.581890  | -5.463015 | -0.952442 | 126 | 6  | 0 | -4.844271 | -2.668900 | 3.994737  |
| 71 | 1 | 0 | 3.568360  | -0.946366 | 5.061492  | 127 | 6  | 0 | -8.282203 | 3.368721  | 1.421540  |
| 72 | 1 | 0 | 3.691210  | -4.015254 | -4.073088 | 128 | 6  | 0 | -6.567895 | 2.506668  | 3.063949  |
| 73 | 1 | 0 | 3.688099  | 3.963969  | 3.889947  | 129 | 1  | 0 | -5.162801 | 1.770057  | 4.520511  |
| 74 | 1 | 0 | 3.582715  | 0.975361  | -4.865505 | 130 | 6  | 0 | -4.806615 | -1.290957 | 4.469107  |
| 75 | 1 | 0 | 3.714574  | 3.990777  | -3.867882 | 131 | 1  | 0 | -8.048633 | -4.290852 | -1.918250 |
| 76 | 1 | 0 | 3.734431  | 5.524702  | 0.940089  | 132 | 6  | 0 | -7.760261 | -2.240498 | -2.365506 |
| 77 | 7 | 0 | 1.206963  | 2.826579  | 4.023807  | 133 | 8  | 0 | -6.118871 | -4.954554 | -0.697298 |
| 78 | 7 | 0 | 1.152025  | 0.235944  | 4.590474  | 134 | 6  | 0 | -7.663358 | 3.287553  | 0.026868  |
| 79 | 7 | 0 | 1.267758  | 5.207141  | -0.213076 | 135 | 1  | 0 | -7.950605 | 4.315296  | 1.856640  |
| 80 | 7 | 0 | 1.267261  | 4.428471  | -2.756038 | 136 | 8  | 0 | -6.033069 | 3.814327  | 3.071521  |
| 81 | 7 | 0 | 1.174199  | -0.229722 | -4.425424 | 137 | 6  | 0 | -8.298307 | -0.943563 | -2.450534 |
| 82 | 7 | 0 | 1.218758  | -2.861401 | -4.073078 | 138 | 6  | 0 | -6.608668 | -2.510554 | -3.121390 |
| 83 | 7 | 0 | 1.125016  | -5.173969 | 0.259713  | 139 | 6  | 0 | -4.858961 | -4.692593 | -1.249993 |
| 84 | 7 | 0 | 1.175129  | -4.367419 | 2.789585  | 140 | 6  | 0 | -2.416094 | -2.746074 | 3.987016  |
| 85 | 1 | 0 | 9.157958  | -0.960907 | 1.744925  | 141 | 6  | 0 | -8.190100 | 2.452300  | -0.971412 |
| 86 | 1 | 0 | 9.064340  | -1.737482 | -0.894266 | 142 | 6  | 0 | -6.543815 | 4.065387  | -0.315408 |
| 87 | 1 | 0 | 9.228589  | 0.934005  | -1.779296 | 143 | 6  | 0 | -4.770200 | 4.050646  | 2.518788  |
| 88 | 1 | 0 | 9.146189  | 1.720666  | 0.903146  | 144 | 6  | 0 | -2.388110 | -1.327661 | 4.424281  |
| 89 | 6 | 0 | 9.849069  | 1.044108  | 3.442091  | 145 | 6  | 0 | -7.716109 | 0.071343  | -3.228506 |
| 90 | 1 | 0 | 10.237634 | 2.037991  | 3.684601  | 146 | 6  | 0 | -6.011546 | -1.540253 | -3.924185 |
| 91 | 1 | 0 | 10.265470 | 0.754550  | 2.471544  | 147 | 8  | 0 | -6.100050 | -3.828992 | -3.148793 |
| 92 | 6 | 0 | 9.924267  | 3.446225  | -1.056372 | 148 | 6  | 0 | -4.848442 | -4.088577 | -2.576009 |
| 93 | 1 | 0 | 10.321806 | 2.476607  | -0.738615 | 149 | 6  | 0 | -7.677862 | 2.394380  | -2.278713 |

|     |   |   |            |           |           |                                             |        |                         |            |           |           |
|-----|---|---|------------|-----------|-----------|---------------------------------------------|--------|-------------------------|------------|-----------|-----------|
| 150 | 6 | 0 | -6.013962  | 4.052288  | -1.603951 | 206                                         | 1      | 0                       | -10.304792 | -2.373380 | -1.050106 |
| 151 | 8 | 0 | -5.993901  | 4.966220  | 0.629422  | 207                                         | 1      | 0                       | -10.288601 | -4.130202 | -0.873599 |
| 152 | 6 | 0 | -4.747757  | 4.677164  | 1.201512  | 208                                         | 52     | 0                       | 0.290923   | -4.703100 | -2.013739 |
| 153 | 6 | 0 | -8.287402  | 1.484521  | -3.344138 | 209                                         | 52     | 0                       | 0.333988   | -2.074526 | 4.176065  |
| 154 | 6 | 0 | -6.552236  | -0.257429 | -3.941296 | 210                                         | 52     | 0                       | 0.389708   | 2.054151  | -4.034050 |
| 155 | 1 | 0 | -5.173901  | -1.796911 | -4.559597 | 211                                         | 52     | 0                       | 0.386636   | 4.621133  | 2.096430  |
| 156 | 6 | 0 | -2.438892  | -4.842591 | -1.281989 | 212                                         | 1      | 0                       | -10.221750 | 3.480030  | 2.390416  |
| 157 | 6 | 0 | -6.580959  | 3.221125  | -2.569452 | 213                                         | 1      | 0                       | -10.239159 | 1.132756  | -2.368514 |
| 158 | 1 | 0 | -5.196363  | 4.714391  | -1.863692 | 214                                         | 1      | 0                       | -10.270766 | -2.440803 | 3.397667  |
| 159 | 6 | 0 | -2.348427  | 4.165587  | 2.621946  | 215                                         | 1      | 0                       | -10.290209 | -3.395133 | -2.491884 |
| 160 | 1 | 0 | -7.961432  | 1.875142  | -4.311910 | 216                                         | 1      | 0                       | -10.190526 | 2.522658  | -3.456746 |
| 161 | 8 | 0 | -5.985319  | 0.729632  | -4.776718 | 217                                         | 6      | 0                       | -5.671844  | -0.189133 | 0.175814  |
| 162 | 6 | 0 | -2.425173  | -4.234954 | -2.634942 | 218                                         | 6      | 0                       | -4.543594  | 0.262214  | -0.764801 |
| 163 | 8 | 0 | -6.056878  | 3.270978  | -3.888450 | 219                                         | 1      | 0                       | -6.614355  | -0.330546 | -0.366364 |
| 164 | 6 | 0 | -2.324262  | 4.820608  | 1.290805  | 220                                         | 1      | 0                       | -5.419447  | -1.138015 | 0.670963  |
| 165 | 6 | 0 | -4.751864  | 1.295382  | -4.456920 | 221                                         | 1      | 0                       | -5.844730  | 0.565442  | 0.956043  |
| 166 | 6 | 0 | -4.786936  | 2.698699  | -4.056624 | 222                                         | 6      | 0                       | -3.275992  | 0.619096  | 0.036407  |
| 167 | 6 | 0 | -2.337027  | 1.314179  | -4.338388 | 223                                         | 1      | 0                       | -4.321958  | -0.529946 | -1.495986 |
| 168 | 6 | 0 | -2.359799  | 2.761491  | -3.994970 | 224                                         | 1      | 0                       | -4.872754  | 1.143012  | -1.339644 |
| 169 | 6 | 0 | -3.682271  | -3.877311 | -3.251795 | 225                                         | 1      | 0                       | -3.507739  | 1.446918  | 0.722623  |
| 170 | 6 | 0 | -3.703796  | -5.068867 | -0.625220 | 226                                         | 1      | 0                       | -2.968409  | -0.236021 | 0.652839  |
| 171 | 6 | 0 | -3.701038  | -3.382250 | 3.786411  | 227                                         | 6      | 0                       | -2.132166  | 1.022437  | -0.885240 |
| 172 | 6 | 0 | -3.628108  | -0.639223 | 4.682096  | 228                                         | 1      | 0                       | -2.395502  | 1.866605  | -1.529016 |
| 173 | 6 | 0 | -3.575407  | 0.620890  | -4.594286 | 229                                         | 1      | 0                       | -1.742109  | 0.187933  | -1.475241 |
| 174 | 6 | 0 | -3.645110  | 3.417558  | -3.869289 | 230                                         | 35     | 0                       | -0.562861  | 1.681465  | 0.205041  |
| 175 | 6 | 0 | -3.619412  | 3.808065  | 3.208148  | 231                                         | 6      | 0                       | 2.072328   | -0.946406 | -0.918610 |
| 176 | 6 | 0 | -3.576695  | 5.057021  | 0.607383  | 232                                         | 1      | 0                       | 2.298526   | -1.730824 | -1.647147 |
| 177 | 1 | 0 | -3.674877  | -3.500947 | -4.268292 | 233                                         | 1      | 0                       | 1.668663   | -0.057794 | -1.413023 |
| 178 | 1 | 0 | -3.727268  | -5.581100 | 0.329805  | 234                                         | 6      | 0                       | 3.253554   | -0.636775 | -0.007186 |
| 179 | 1 | 0 | -3.546901  | -0.404572 | -4.942231 | 235                                         | 6      | 0                       | 4.486438   | -0.180757 | -0.811489 |
| 180 | 1 | 0 | -3.731891  | -4.427007 | 3.499050  | 236                                         | 1      | 0                       | 3.516043   | -1.531709 | 0.576038  |
| 181 | 1 | 0 | -3.674693  | 4.474735  | -3.632008 | 237                                         | 1      | 0                       | 2.967837   | 0.144274  | 0.709902  |
| 182 | 1 | 0 | -3.602112  | 0.362259  | 5.094147  | 238                                         | 6      | 0                       | 5.644363   | 0.186620  | 0.130282  |
| 183 | 1 | 0 | -3.633885  | 3.411992  | 4.216886  | 239                                         | 1      | 0                       | 4.803737   | -0.991092 | -1.487521 |
| 184 | 1 | 0 | -3.581622  | 5.588550  | -0.337800 | 240                                         | 1      | 0                       | 4.229019   | 0.680933  | -1.446106 |
| 185 | 7 | 0 | -1.194470  | 3.337504  | -3.760643 | 241                                         | 1      | 0                       | 6.553844   | 0.433039  | -0.429949 |
| 186 | 7 | 0 | -1.143612  | 0.755734  | -4.379064 | 242                                         | 1      | 0                       | 5.386288   | 1.054303  | 0.754705  |
| 187 | 7 | 0 | -1.122281  | 5.123048  | 0.819808  | 243                                         | 1      | 0                       | 5.879889   | -0.653566 | 0.798788  |
| 188 | 7 | 0 | -1.178738  | 3.941016  | 3.198155  | 244                                         | 35     | 0                       | 0.539622   | -1.686709 | 0.171471  |
| 189 | 7 | 0 | -1.189610  | -0.783877 | 4.544140  | -----                                       |        |                         |            |           |           |
| 190 | 7 | 0 | -1.243778  | -3.321970 | 3.771261  | -----                                       |        |                         |            |           |           |
| 191 | 7 | 0 | -1.250268  | -5.116196 | -0.759178 | <b>RBr-RI@A<sub>Te</sub>+A<sub>Te</sub></b> |        |                         |            |           |           |
| 192 | 7 | 0 | -1.236734  | -4.044198 | -3.190994 | -----                                       |        |                         |            |           |           |
| 193 | 1 | 0 | -9.203665  | -0.719437 | -1.893826 | -----                                       |        |                         |            |           |           |
| 194 | 1 | 0 | -9.144201  | -1.808857 | 0.676550  | Atom                                        | Atomic | Coordinates (Angstroms) |            |           |           |
| 195 | 1 | 0 | -9.189217  | 0.765200  | 1.819910  |                                             | Type   | X                       | Y          | Z         |           |
| 196 | 1 | 0 | -9.044968  | 1.829091  | -0.723878 | -----                                       |        |                         |            |           |           |
| 197 | 6 | 0 | -9.825804  | 1.500968  | -3.313350 | 1                                           | 6      | 0                       | 8.313793   | -3.406761 | 1.338381  |
| 198 | 1 | 0 | -10.223256 | 0.872619  | -4.116591 | 2                                           | 6      | 0                       | 7.721312   | -2.307909 | 2.221223  |
| 199 | 6 | 0 | -9.820118  | 3.371679  | 1.378074  | 3                                           | 6      | 0                       | 7.709823   | -3.325422 | -0.060313 |
| 200 | 1 | 0 | -10.238447 | 2.453747  | 0.952036  | 4                                           | 1      | 0                       | 7.990683   | -4.360088 | 1.765620  |
| 201 | 1 | 0 | -10.175650 | 4.209262  | 0.770113  | 5                                           | 6      | 0                       | 8.284291   | -1.027050 | 2.351114  |
| 202 | 6 | 0 | -9.881344  | -1.426734 | 3.265148  | 6                                           | 6      | 0                       | 6.553390   | -2.573610 | 2.956436  |
| 203 | 1 | 0 | -10.288370 | -1.036889 | 2.326222  | 7                                           | 6      | 0                       | 8.225341   | -2.462685 | -1.042305 |
| 204 | 1 | 0 | -10.261028 | -0.798236 | 4.076781  | 8                                           | 6      | 0                       | 6.588567   | -4.096235 | -0.409587 |
| 205 | 6 | 0 | -9.902403  | -3.299970 | -1.472834 | 9                                           | 6      | 0                       | 7.740606   | -0.033523 | 3.188005  |

|    |   |   |          |           |           |     |    |   |           |           |           |
|----|---|---|----------|-----------|-----------|-----|----|---|-----------|-----------|-----------|
| 10 | 6 | 0 | 6.009121 | -1.639483 | 3.832147  | 66  | 6  | 0 | 3.738310  | 3.938041  | -3.005552 |
| 11 | 8 | 0 | 6.000417 | -3.868987 | 2.885531  | 67  | 6  | 0 | 3.527750  | -3.119981 | -3.766551 |
| 12 | 6 | 0 | 7.673538 | -2.334934 | -2.328047 | 68  | 6  | 0 | 3.567746  | -0.374795 | -4.663163 |
| 13 | 6 | 0 | 6.007205 | -3.999836 | -1.671269 | 69  | 1  | 0 | 3.649936  | 4.096265  | 3.293217  |
| 14 | 8 | 0 | 6.074655 | -5.064927 | 0.489580  | 70  | 1  | 0 | 3.648474  | -0.528551 | 5.325251  |
| 15 | 6 | 0 | 8.347038 | 1.364810  | 3.328957  | 71  | 1  | 0 | 3.880809  | 5.925812  | 0.429128  |
| 16 | 6 | 0 | 6.600287 | -0.380246 | 3.928143  | 72  | 1  | 0 | 3.553805  | -3.347983 | 3.890467  |
| 17 | 1 | 0 | 5.170034 | -1.900154 | 4.463863  | 73  | 1  | 0 | 3.706574  | 3.493136  | -3.992851 |
| 18 | 6 | 0 | 4.759040 | -4.111603 | 2.297320  | 74  | 1  | 0 | 3.706912  | -5.895222 | -0.470878 |
| 19 | 6 | 0 | 8.278716 | -1.401723 | -3.379216 | 75  | 1  | 0 | 3.527976  | -4.166602 | -3.484174 |
| 20 | 6 | 0 | 6.539179 | -3.116079 | -2.607872 | 76  | 1  | 0 | 3.570051  | 0.628543  | -5.072004 |
| 21 | 1 | 0 | 5.172502 | -4.638187 | -1.935781 | 77  | 7  | 0 | 1.300901  | 4.092155  | -2.865742 |
| 22 | 6 | 0 | 4.799936 | -4.832287 | 1.028467  | 78  | 7  | 0 | 1.377542  | 5.488666  | -0.602665 |
| 23 | 1 | 0 | 8.012548 | 1.750377  | 4.296140  | 79  | 7  | 0 | 1.131711  | -0.413721 | -4.534599 |
| 24 | 6 | 0 | 7.788689 | 2.315626  | 2.267407  | 80  | 7  | 0 | 1.065806  | -2.938211 | -3.740866 |
| 25 | 8 | 0 | 6.065429 | 0.550023  | 4.852181  | 81  | 7  | 0 | 1.209091  | -5.446515 | 0.565185  |
| 26 | 6 | 0 | 7.744974 | 0.023474  | -3.223615 | 82  | 7  | 0 | 1.140442  | -4.011081 | 2.797676  |
| 27 | 1 | 0 | 7.925106 | -1.759626 | -4.350408 | 83  | 7  | 0 | 1.210337  | 0.474196  | 4.677297  |
| 28 | 8 | 0 | 5.945754 | -3.084776 | -3.895040 | 84  | 7  | 0 | 1.191741  | 2.912799  | 3.636610  |
| 29 | 6 | 0 | 8.366812 | 2.459114  | 0.994341  | 85  | 1  | 0 | 9.240451  | 1.859356  | 0.754494  |
| 30 | 6 | 0 | 6.652120 | 3.095724  | 2.538192  | 86  | 1  | 0 | 9.182953  | -0.795373 | 1.786311  |
| 31 | 6 | 0 | 4.810348 | 1.094696  | 4.552542  | 87  | 1  | 0 | 9.090939  | -1.856175 | -0.790832 |
| 32 | 6 | 0 | 2.342534 | -4.258161 | 2.308668  | 88  | 1  | 0 | 9.268193  | 0.756586  | -1.894209 |
| 33 | 6 | 0 | 8.357345 | 1.010734  | -2.428979 | 89  | 6  | 0 | 9.998957  | 3.320596  | -1.384754 |
| 34 | 6 | 0 | 6.576631 | 0.389475  | -3.910978 | 90  | 1  | 0 | 10.387857 | 3.421898  | -2.402768 |
| 35 | 6 | 0 | 4.697232 | -2.457884 | -4.008989 | 91  | 1  | 0 | 10.381572 | 2.378893  | -0.977246 |
| 36 | 6 | 0 | 2.375363 | -5.050467 | 1.050917  | 92  | 6  | 0 | 9.816838  | -1.452666 | -3.379266 |
| 37 | 6 | 0 | 7.857962 | 3.320062  | 0.004763  | 93  | 1  | 0 | 10.255558 | -1.108843 | -2.436646 |
| 38 | 6 | 0 | 6.146075 | 4.001921  | 1.609694  | 94  | 1  | 0 | 10.212005 | -0.818826 | -4.179314 |
| 39 | 8 | 0 | 6.059899 | 3.036101  | 3.822690  | 95  | 6  | 0 | 9.851748  | -3.383317 | 1.320038  |
| 40 | 6 | 0 | 4.807328 | 2.431608  | 3.968426  | 96  | 1  | 0 | 10.261220 | -2.458776 | 0.899770  |
| 41 | 6 | 0 | 7.835575 | 2.310935  | -2.289051 | 97  | 1  | 0 | 10.229739 | -4.215048 | 0.717698  |
| 42 | 6 | 0 | 6.047139 | 1.674558  | -3.833748 | 98  | 6  | 0 | 9.885595  | 1.333728  | 3.330310  |
| 43 | 8 | 0 | 5.979569 | -0.552729 | -4.777413 | 99  | 1  | 0 | 10.306622 | 0.953920  | 2.393449  |
| 44 | 6 | 0 | 4.719914 | -1.073090 | -4.467490 | 100 | 1  | 0 | 10.245459 | 0.690250  | 4.139123  |
| 45 | 6 | 0 | 8.462781 | 3.389401  | -1.399418 | 101 | 52 | 0 | -0.462465 | -1.634312 | -4.176474 |
| 46 | 6 | 0 | 6.740367 | 4.098784  | 0.352073  | 102 | 52 | 0 | -0.196061 | 4.891189  | -1.766976 |
| 47 | 1 | 0 | 5.322093 | 4.654562  | 1.871778  | 103 | 52 | 0 | -0.367711 | -4.840393 | 1.729432  |
| 48 | 6 | 0 | 2.384455 | 1.050586  | 4.503752  | 104 | 52 | 0 | -0.362862 | 1.690358  | 4.162921  |
| 49 | 6 | 0 | 6.664849 | 2.608649  | -3.005168 | 105 | 1  | 0 | 10.157312 | -2.479089 | -3.546522 |
| 50 | 1 | 0 | 5.199426 | 1.957102  | -4.443247 | 106 | 1  | 0 | 10.240334 | -3.484818 | 2.338205  |
| 51 | 6 | 0 | 2.269081 | -2.429199 | -3.949375 | 107 | 1  | 0 | 10.403972 | 4.133437  | -0.774221 |
| 52 | 1 | 0 | 8.165323 | 4.353804  | -1.820833 | 108 | 1  | 0 | 10.280264 | 2.342654  | 3.484969  |
| 53 | 8 | 0 | 6.245878 | 5.079589  | -0.544083 | 109 | 6  | 0 | -8.344594 | 3.338343  | 1.666613  |
| 54 | 6 | 0 | 2.383738 | 2.415235  | 3.910752  | 110 | 6  | 0 | -7.762534 | 2.159282  | 2.448615  |
| 55 | 8 | 0 | 6.161649 | 3.925675  | -2.958267 | 111 | 6  | 0 | -7.733744 | 3.380991  | 0.266217  |
| 56 | 6 | 0 | 2.298509 | -1.012776 | -4.400599 | 112 | 1  | 0 | -8.017777 | 4.247284  | 2.179422  |
| 57 | 6 | 0 | 4.967428 | 4.879223  | -1.088901 | 113 | 6  | 0 | -8.338247 | 0.877073  | 2.475798  |
| 58 | 6 | 0 | 4.920691 | 4.193328  | -2.374470 | 114 | 6  | 0 | -6.570630 | 2.341791  | 3.169725  |
| 59 | 6 | 0 | 2.546095 | 5.117231  | -1.109319 | 115 | 6  | 0 | -8.248943 | 2.606925  | -0.788609 |
| 60 | 6 | 0 | 2.505473 | 4.354697  | -2.383121 | 116 | 6  | 0 | -6.613534 | 4.179580  | -0.017366 |
| 61 | 6 | 0 | 3.644182 | 3.079525  | 3.668576  | 117 | 6  | 0 | -7.773060 | -0.199906 | 3.185721  |
| 62 | 6 | 0 | 3.651816 | 0.434700  | 4.828928  | 118 | 6  | 0 | -6.003592 | 1.320651  | 3.926090  |
| 63 | 6 | 0 | 3.577499 | -3.821701 | 2.915880  | 119 | 8  | 0 | -6.011153 | 3.634663  | 3.212684  |
| 64 | 6 | 0 | 3.665206 | -5.303945 | 0.436926  | 120 | 6  | 0 | -7.702507 | 2.595816  | -2.082292 |
| 65 | 6 | 0 | 3.836040 | 5.352007  | -0.489678 | 121 | 6  | 0 | -6.034057 | 4.193645  | -1.284505 |

|     |   |   |           |           |           |     |    |   |            |           |           |
|-----|---|---|-----------|-----------|-----------|-----|----|---|------------|-----------|-----------|
| 122 | 8 | 0 | -6.088186 | 5.064869  | 0.959502  | 178 | 1  | 0 | -3.639396  | 0.072903  | 5.290228  |
| 123 | 6 | 0 | -8.371291 | -1.608495 | 3.207005  | 179 | 1  | 0 | -3.915512  | -5.932410 | -0.111897 |
| 124 | 6 | 0 | -6.603140 | 0.062331  | 3.914523  | 180 | 1  | 0 | -3.558227  | 2.965054  | 4.131710  |
| 125 | 1 | 0 | -5.146502 | 1.513593  | 4.557192  | 181 | 1  | 0 | -3.724197  | -3.021683 | -4.236717 |
| 126 | 6 | 0 | -4.768589 | 3.917146  | 2.645322  | 182 | 1  | 0 | -3.713643  | 5.960449  | 0.064986  |
| 127 | 6 | 0 | -8.314570 | 1.769064  | -3.215978 | 183 | 1  | 0 | -3.554781  | 4.517430  | -3.092829 |
| 128 | 6 | 0 | -6.567711 | 3.398131  | -2.295100 | 184 | 1  | 0 | -3.623623  | -0.101681 | -5.133722 |
| 129 | 1 | 0 | -5.199382 | 4.852790  | -1.492072 | 185 | 7  | 0 | -1.324950  | -3.758333 | -3.184620 |
| 130 | 6 | 0 | -4.810483 | 4.766163  | 1.459683  | 186 | 7  | 0 | -1.407181  | -5.395436 | -1.088340 |
| 131 | 1 | 0 | -8.035690 | -2.073412 | 4.138365  | 187 | 7  | 0 | -1.178624  | 0.865132  | -4.490460 |
| 132 | 6 | 0 | -7.802364 | -2.459983 | 2.068676  | 188 | 7  | 0 | -1.099505  | 3.311546  | -3.483212 |
| 133 | 8 | 0 | -6.069320 | -0.955137 | 4.738950  | 189 | 7  | 0 | -1.214072  | 5.353812  | 1.013045  |
| 134 | 6 | 0 | -7.779622 | 0.336562  | -3.197673 | 190 | 7  | 0 | -1.147967  | 3.684241  | 3.073215  |
| 135 | 1 | 0 | -7.965277 | 2.218799  | -4.149698 | 191 | 7  | 0 | -1.213179  | -0.929725 | 4.624419  |
| 136 | 8 | 0 | -5.981576 | 3.483325  | -3.583038 | 192 | 7  | 0 | -1.207697  | -3.300187 | 3.437174  |
| 137 | 6 | 0 | -8.371850 | -2.474126 | 0.784109  | 193 | 1  | 0 | -9.234947  | -1.841402 | 0.597099  |
| 138 | 6 | 0 | -6.674977 | -3.275601 | 2.268096  | 194 | 1  | 0 | -9.258196  | 0.709665  | 1.922974  |
| 139 | 6 | 0 | -4.817629 | -1.484135 | 4.409810  | 195 | 1  | 0 | -9.113973  | 1.980006  | -0.590280 |
| 140 | 6 | 0 | -2.350482 | 4.007365  | 2.633328  | 196 | 1  | 0 | -9.295558  | -0.511780 | -1.930386 |
| 141 | 6 | 0 | -8.385017 | -0.716493 | -2.486484 | 197 | 6  | 0 | -10.019250 | -3.110103 | -1.650549 |
| 142 | 6 | 0 | -6.614166 | 0.034692  | -3.918908 | 198 | 1  | 0 | -10.422879 | -3.977000 | -1.118494 |
| 143 | 6 | 0 | -4.734942 | 2.869326  | -3.767449 | 199 | 6  | 0 | -9.852501  | 1.820836  | -3.203663 |
| 144 | 6 | 0 | -2.382564 | 4.932395  | 1.470208  | 200 | 1  | 0 | -10.287259 | 1.391324  | -2.294968 |
| 145 | 6 | 0 | -7.872859 | -3.248514 | -0.278976 | 201 | 1  | 0 | -10.252312 | 1.264812  | -4.057469 |
| 146 | 6 | 0 | -6.170453 | -4.089021 | 1.256060  | 202 | 6  | 0 | -9.882084  | 3.326597  | 1.636161  |
| 147 | 8 | 0 | -6.084458 | -3.360065 | 3.552467  | 203 | 1  | 0 | -10.293488 | 2.446023  | 1.131702  |
| 148 | 6 | 0 | -4.824479 | -2.786254 | 3.752797  | 204 | 1  | 0 | -10.251461 | 4.211116  | 1.108427  |
| 149 | 6 | 0 | -7.857337 | -2.020546 | -2.460055 | 205 | 6  | 0 | -9.909761  | -1.591502 | 3.205681  |
| 150 | 6 | 0 | -6.073521 | -1.248474 | -3.946189 | 206 | 1  | 0 | -10.331916 | -1.136100 | 2.303702  |
| 151 | 8 | 0 | -6.025392 | 1.046877  | -4.709643 | 207 | 1  | 0 | -10.277973 | -1.023896 | 4.065980  |
| 152 | 6 | 0 | -4.763363 | 1.536481  | -4.358936 | 208 | 52 | 0 | 0.350153   | -2.126225 | 4.060626  |
| 153 | 6 | 0 | -8.483404 | -3.179949 | -1.679282 | 209 | 52 | 0 | 0.365404   | 4.600190  | 2.084477  |
| 154 | 6 | 0 | -6.763349 | -4.066622 | -0.005201 | 210 | 52 | 0 | 0.171870   | -4.679379 | -2.182513 |
| 155 | 1 | 0 | -5.349039 | -4.766629 | 1.456718  | 211 | 52 | 0 | 0.420627   | 2.040153  | -4.026302 |
| 156 | 6 | 0 | -2.392324 | -1.476733 | 4.395140  | 212 | 1  | 0 | -10.192257 | 2.858733  | -3.272743 |
| 157 | 6 | 0 | -6.683544 | -2.250184 | -3.196091 | 213 | 1  | 0 | -10.398094 | -2.211131 | -1.153016 |
| 158 | 1 | 0 | -5.226762 | -1.474410 | -4.579928 | 214 | 1  | 0 | -10.277610 | 3.338738  | 2.656727  |
| 159 | 6 | 0 | -2.305851 | 2.827469  | -3.729708 | 215 | 1  | 0 | -10.295568 | -2.613473 | 3.270803  |
| 160 | 1 | 0 | -8.190663 | -4.098760 | -2.195120 | 216 | 1  | 0 | -10.413137 | -3.113085 | -2.671663 |
| 161 | 8 | 0 | -6.273737 | -4.968451 | -0.985006 | 217 | 6  | 0 | -6.045677  | 0.083515  | -0.055494 |
| 162 | 6 | 0 | -2.399416 | -2.805711 | 3.726614  | 218 | 6  | 0 | -4.682865  | -0.390326 | 0.457649  |
| 163 | 8 | 0 | -6.182499 | -3.567154 | -3.259508 | 219 | 1  | 0 | -6.829175  | -0.665679 | 0.081023  |
| 164 | 6 | 0 | -2.342258 | 1.458139  | -4.306337 | 220 | 1  | 0 | -6.348733  | 0.993596  | 0.475783  |
| 165 | 6 | 0 | -4.994024 | -4.721284 | -1.507524 | 221 | 1  | 0 | -5.988649  | 0.328315  | -1.125090 |
| 166 | 6 | 0 | -4.942996 | -3.896279 | -2.709683 | 222 | 6  | 0 | -3.656015  | 0.728652  | 0.215130  |
| 167 | 6 | 0 | -2.573186 | -4.966612 | -1.551531 | 223 | 1  | 0 | -4.740223  | -0.632398 | 1.530159  |
| 168 | 6 | 0 | -2.529560 | -4.065819 | -2.733344 | 224 | 1  | 0 | -4.373208  | -1.308034 | -0.063713 |
| 169 | 6 | 0 | -3.666852 | -3.435725 | 3.432226  | 225 | 1  | 0 | -3.685920  | 1.006710  | -0.848057 |
| 170 | 6 | 0 | -3.653325 | -0.858031 | 4.736035  | 226 | 1  | 0 | -3.941234  | 1.623036  | 0.787685  |
| 171 | 6 | 0 | -3.586656 | 3.539324  | 3.213239  | 227 | 6  | 0 | -2.247623  | 0.298678  | 0.582024  |
| 172 | 6 | 0 | -3.673816 | 5.276627  | 0.905375  | 228 | 1  | 0 | -1.920933  | -0.589757 | 0.041622  |
| 173 | 6 | 0 | -3.866472 | -5.263571 | -0.963737 | 229 | 1  | 0 | -2.091278  | 0.166412  | 1.657000  |
| 174 | 6 | 0 | -3.759500 | -3.575672 | -3.306477 | 230 | 35 | 0 | -0.951650  | 1.743929  | 0.019483  |
| 175 | 6 | 0 | -3.560909 | 3.502696  | -3.474299 | 231 | 6  | 0 | 2.312924   | -0.209429 | 0.841153  |
| 176 | 6 | 0 | -3.614806 | 0.856031  | -4.627283 | 232 | 1  | 0 | 1.867568   | 0.783250  | 0.732245  |
| 177 | 1 | 0 | -3.685303 | -4.430245 | 3.001355  | 233 | 1  | 0 | 2.368160   | -0.489244 | 1.898307  |

|     |    |   |          |           |           |
|-----|----|---|----------|-----------|-----------|
| 234 | 6  | 0 | 3.639622 | -0.378422 | 0.110984  |
| 235 | 6  | 0 | 4.792536 | 0.456260  | 0.687183  |
| 236 | 1  | 0 | 3.507181 | -0.120186 | -0.949577 |
| 237 | 1  | 0 | 3.937187 | -1.437118 | 0.139799  |
| 238 | 6  | 0 | 6.032948 | 0.167605  | -0.168339 |
| 239 | 1  | 0 | 4.548561 | 1.528596  | 0.672057  |
| 240 | 1  | 0 | 4.972898 | 0.176998  | 1.735972  |
| 241 | 1  | 0 | 6.942478 | 0.614752  | 0.237217  |
| 242 | 1  | 0 | 6.187703 | -0.916964 | -0.237316 |
| 243 | 1  | 0 | 5.882989 | 0.550135  | -1.186231 |
| 244 | 53 | 0 | 0.898736 | -1.600681 | -0.067192 |

|    |   |   |           |           |           |
|----|---|---|-----------|-----------|-----------|
| 38 | 6 | 0 | 6.164036  | 3.816430  | 1.947086  |
| 39 | 8 | 0 | 6.063979  | 2.645291  | 4.057579  |
| 40 | 6 | 0 | 4.810199  | 2.033716  | 4.144304  |
| 41 | 6 | 0 | 7.862413  | 2.506166  | -2.063346 |
| 42 | 6 | 0 | 6.068576  | 2.020553  | -3.656919 |
| 43 | 8 | 0 | 5.977837  | -0.116102 | -4.789615 |
| 44 | 6 | 0 | 4.716305  | -0.654271 | -4.520410 |
| 45 | 6 | 0 | 8.505552  | 3.499190  | -1.086066 |
| 46 | 6 | 0 | 6.774939  | 4.041516  | 0.714104  |
| 47 | 1 | 0 | 5.328187  | 4.431333  | 2.258157  |
| 48 | 6 | 0 | 2.389800  | 0.606242  | 4.552180  |
| 49 | 6 | 0 | 6.694941  | 2.874599  | -2.751780 |
| 50 | 1 | 0 | 5.223856  | 2.363242  | -4.239210 |
| 51 | 6 | 0 | 2.258534  | -2.034102 | -4.101231 |
| 52 | 1 | 0 | 8.214461  | 4.498861  | -1.421106 |
| 53 | 8 | 0 | 6.285314  | 5.101439  | -0.088991 |
| 54 | 6 | 0 | 2.388177  | 2.011981  | 4.065813  |
| 55 | 8 | 0 | 6.203996  | 4.188821  | -2.598892 |
| 56 | 6 | 0 | 2.295881  | -0.582759 | -4.425540 |
| 57 | 6 | 0 | 5.006971  | 4.969077  | -0.653365 |
| 58 | 6 | 0 | 4.961306  | 4.417277  | -2.002321 |
| 59 | 6 | 0 | 2.589204  | 5.242653  | -0.667028 |
| 60 | 6 | 0 | 2.548480  | 4.616418  | -2.014264 |
| 61 | 6 | 0 | 3.646738  | 2.699157  | 3.886009  |
| 62 | 6 | 0 | 3.656566  | -0.026493 | 4.842767  |
| 63 | 6 | 0 | 3.577070  | -4.137195 | 2.587802  |
| 64 | 6 | 0 | 3.668361  | -5.386821 | -0.015672 |
| 65 | 6 | 0 | 3.877385  | 5.395556  | -0.017454 |
| 66 | 6 | 0 | 3.781766  | 4.247142  | -2.666177 |
| 67 | 6 | 0 | 3.513231  | -2.747480 | -3.994451 |
| 68 | 6 | 0 | 3.568233  | 0.066549  | -4.643652 |
| 69 | 1 | 0 | 3.650450  | 3.741768  | 3.590138  |
| 70 | 1 | 0 | 3.653676  | -1.025274 | 5.262905  |
| 71 | 1 | 0 | 3.921331  | 5.874522  | 0.954155  |
| 72 | 1 | 0 | 3.555741  | -3.755266 | 3.602117  |
| 73 | 1 | 0 | 3.752806  | 3.903761  | -3.693274 |
| 74 | 1 | 0 | 3.711870  | -5.894256 | -0.972744 |
| 75 | 1 | 0 | 3.507495  | -3.814604 | -3.803874 |
| 76 | 1 | 0 | 3.575786  | 1.102726  | -4.960175 |
| 77 | 7 | 0 | 1.345288  | 4.420986  | -2.532102 |
| 78 | 7 | 0 | 1.422341  | 5.576833  | -0.131594 |
| 79 | 7 | 0 | 1.133706  | 0.034578  | -4.493835 |
| 80 | 7 | 0 | 1.054305  | -2.551239 | -3.925523 |
| 81 | 7 | 0 | 1.216443  | -5.577336 | 0.111099  |
| 82 | 7 | 0 | 1.140579  | -4.352691 | 2.467914  |
| 83 | 7 | 0 | 1.217749  | 0.011250  | 4.669496  |
| 84 | 7 | 0 | 1.194747  | 2.523815  | 3.824596  |
| 85 | 1 | 0 | 9.299526  | 1.804008  | 0.939191  |
| 86 | 1 | 0 | 9.184363  | -0.978138 | 1.702988  |
| 87 | 1 | 0 | 9.086093  | -1.800076 | -0.942238 |
| 88 | 1 | 0 | 9.277895  | 0.907286  | -1.804155 |
| 89 | 6 | 0 | 10.040786 | 3.414860  | -1.089142 |
| 90 | 1 | 0 | 10.423836 | 3.600934  | -2.097272 |
| 91 | 1 | 0 | 10.416320 | 2.437419  | -0.768560 |
| 92 | 6 | 0 | 9.809939  | -1.164320 | -3.480967 |
| 93 | 1 | 0 | 10.251383 | -0.909617 | -2.511757 |

RI-RI@A<sub>Te</sub>+A<sub>Te</sub>

| Atom | Atomic Type | Coordinates (Angstroms) |          |           |           |
|------|-------------|-------------------------|----------|-----------|-----------|
|      |             | X                       | Y        | Z         |           |
| 1    | 6           | 0                       | 8.312050 | -3.539539 | 1.031460  |
| 2    | 6           | 0                       | 7.720974 | -2.520772 | 2.005865  |
| 3    | 6           | 0                       | 7.703249 | -3.329202 | -0.351627 |
| 4    | 1           | 0                       | 7.988000 | -4.526279 | 1.373358  |
| 5    | 6           | 0                       | 8.285207 | -1.256068 | 2.245754  |
| 6    | 6           | 0                       | 6.549887 | -2.847468 | 2.710443  |
| 7    | 6           | 0                       | 8.216890 | -2.376143 | -1.246864 |
| 8    | 6           | 0                       | 6.578924 | -4.061064 | -0.766880 |
| 9    | 6           | 0                       | 7.743701 | -0.337219 | 3.165675  |
| 10   | 6           | 0                       | 6.005310 | -1.990226 | 3.660814  |
| 11   | 8           | 0                       | 6.000003 | -4.134911 | 2.535550  |
| 12   | 6           | 0                       | 7.661549 | -2.124691 | -2.512189 |
| 13   | 6           | 0                       | 5.992352 | -3.842161 | -2.010747 |
| 14   | 8           | 0                       | 6.073526 | -5.112549 | 0.039232  |
| 15   | 6           | 0                       | 8.361246 | 1.039009  | 3.435466  |
| 16   | 6           | 0                       | 6.602190 | -0.747414 | 3.871644  |
| 17   | 1           | 0                       | 5.163306 | -2.302974 | 4.264457  |
| 18   | 6           | 0                       | 4.758022 | -4.343285 | 1.934114  |
| 19   | 6           | 0                       | 8.272105 | -1.102864 | -3.474648 |
| 20   | 6           | 0                       | 6.524600 | -2.873923 | -2.860324 |
| 21   | 1           | 0                       | 5.153998 | -4.449333 | -2.331350 |
| 22   | 6           | 0                       | 4.799942 | -4.946316 | 0.605143  |
| 23   | 1           | 0                       | 8.024804 | 1.336290  | 4.432869  |
| 24   | 6           | 0                       | 7.818393 | 2.091995  | 2.465183  |
| 25   | 8           | 0                       | 6.069402 | 0.091977  | 4.879934  |
| 26   | 6           | 0                       | 7.749803 | 0.307457  | -3.192955 |
| 27   | 1           | 0                       | 7.916408 | -1.369589 | -4.473979 |
| 28   | 8           | 0                       | 5.928952 | -2.717762 | -4.137322 |
| 29   | 6           | 0                       | 8.416854 | 2.369624  | 1.223554  |
| 30   | 6           | 0                       | 6.667933 | 2.830470  | 2.791674  |
| 31   | 6           | 0                       | 4.813587 | 0.657115  | 4.625308  |
| 32   | 6           | 0                       | 2.343932 | -4.539996 | 1.953352  |
| 33   | 6           | 0                       | 8.370420 | 1.216763  | -2.315214 |
| 34   | 6           | 0                       | 6.585402 | 0.742068  | -3.845786 |
| 35   | 6           | 0                       | 4.685498 | -2.074968 | -4.187667 |
| 36   | 6           | 0                       | 2.380095 | -5.213061 | 0.628068  |
| 37   | 6           | 0                       | 7.907091 | 3.312256  | 0.310556  |

|     |    |   |           |           |           |     |   |   |            |           |           |
|-----|----|---|-----------|-----------|-----------|-----|---|---|------------|-----------|-----------|
| 94  | 1  | 0 | 10.208981 | -0.463768 | -4.221164 | 150 | 6 | 0 | -6.061539  | -0.861454 | -3.988954 |
| 95  | 6  | 0 | 9.849725  | -3.516838 | 1.012356  | 151 | 8 | 0 | -6.009502  | 1.498341  | -4.527708 |
| 96  | 1  | 0 | 10.260380 | -2.559560 | 0.674786  | 152 | 6 | 0 | -4.745870  | 1.954372  | -4.145479 |
| 97  | 1  | 0 | 10.225380 | -4.292820 | 0.338459  | 153 | 6 | 0 | -8.498399  | -3.001247 | -1.950440 |
| 98  | 6  | 0 | 9.899375  | 0.991863  | 3.441956  | 154 | 6 | 0 | -6.782394  | -4.065448 | -0.367835 |
| 99  | 1  | 0 | 10.321871 | 0.693062  | 2.476896  | 155 | 1 | 0 | -5.375196  | -4.909873 | 1.022158  |
| 100 | 1  | 0 | 10.247795 | 0.274374  | 4.191219  | 156 | 6 | 0 | -2.390653  | -1.920987 | 4.228245  |
| 101 | 1  | 0 | 10.143194 | -2.173838 | -3.740202 | 157 | 6 | 0 | -6.684981  | -1.927377 | -3.346422 |
| 102 | 1  | 0 | 10.239694 | -3.708440 | 2.016906  | 158 | 1 | 0 | -5.206538  | -1.027667 | -4.629215 |
| 103 | 1  | 0 | 10.458189 | 4.167249  | -0.413010 | 159 | 6 | 0 | -2.283654  | 3.218296  | -3.470182 |
| 104 | 1  | 0 | 10.303348 | 1.978512  | 3.688798  | 160 | 1 | 0 | -8.208917  | -3.863442 | -2.557916 |
| 105 | 52 | 0 | -0.469647 | -1.199935 | -4.225058 | 161 | 8 | 0 | -6.287508  | -4.873599 | -1.424629 |
| 106 | 52 | 0 | -0.148130 | 5.119974  | -1.360051 | 162 | 6 | 0 | -2.404225  | -3.199503 | 3.467172  |
| 107 | 52 | 0 | -0.359881 | -5.087167 | 1.322945  | 163 | 8 | 0 | -6.188431  | -3.234007 | -3.523350 |
| 108 | 52 | 0 | -0.358353 | 1.254179  | 4.238906  | 164 | 6 | 0 | -2.325186  | 1.883570  | -4.121551 |
| 109 | 6  | 0 | -8.335896 | 3.171729  | 1.978631  | 165 | 6 | 0 | -5.005216  | -4.573396 | -1.912196 |
| 110 | 6  | 0 | -7.761384 | 1.918513  | 2.642113  | 166 | 6 | 0 | -4.950131  | -3.615908 | -3.011028 |
| 111 | 6  | 0 | -7.718074 | 3.351278  | 0.590402  | 167 | 6 | 0 | -2.584537  | -4.815284 | -1.980058 |
| 112 | 1  | 0 | -8.007962 | 4.024282  | 2.580041  | 168 | 6 | 0 | -2.538522  | -3.775743 | -3.041706 |
| 113 | 6  | 0 | -8.348570 | 0.643150  | 2.558862  | 169 | 6 | 0 | -3.676354  | -3.795932 | 3.122925  |
| 114 | 6  | 0 | -6.559149 | 2.026328  | 3.360514  | 170 | 6 | 0 | -3.647588  | -1.317790 | 4.607227  |
| 115 | 6  | 0 | -8.227419 | 2.678006  | -0.533659 | 171 | 6 | 0 | -3.571969  | 3.198987  | 3.490906  |
| 116 | 6  | 0 | -6.604327 | 4.182669  | 0.381792  | 172 | 6 | 0 | -3.663897  | 5.193057  | 1.399071  |
| 117 | 6  | 0 | -7.778129 | -0.498510 | 3.155320  | 173 | 6 | 0 | -3.879478  | -5.176203 | -1.431622 |
| 118 | 6  | 0 | -5.986746 | 0.936098  | 4.008129  | 174 | 6 | 0 | -3.765211  | -3.222919 | -3.559082 |
| 119 | 8  | 0 | -5.995627 | 3.308247  | 3.515239  | 175 | 6 | 0 | -3.539818  | 3.867107  | -3.152894 |
| 120 | 6  | 0 | -7.687852 | 2.798935  | -1.825655 | 176 | 6 | 0 | -3.597899  | 1.294275  | -4.462615 |
| 121 | 6  | 0 | -6.026373 | 4.318744  | -0.878348 | 177 | 1 | 0 | -3.701730  | -4.756563 | 2.621237  |
| 122 | 8  | 0 | -6.077965 | 4.974311  | 1.436141  | 178 | 1 | 0 | -3.627834  | -0.430675 | 5.228807  |
| 123 | 6  | 0 | -8.379485 | -1.903601 | 3.058527  | 179 | 1 | 0 | -3.931552  | -5.937857 | -0.661862 |
| 124 | 6  | 0 | -6.594671 | -0.311706 | 3.885597  | 180 | 1 | 0 | -3.539034  | 2.523473  | 4.337256  |
| 125 | 1  | 0 | -5.120354 | 1.063530  | 4.642729  | 181 | 1 | 0 | -3.724465  | -2.566392 | -4.419385 |
| 126 | 6  | 0 | -4.754362 | 3.644216  | 2.977568  | 182 | 1 | 0 | -3.706544  | 5.965936  | 0.639976  |
| 127 | 6  | 0 | -8.309408 | 2.078599  | -3.025418 | 183 | 1 | 0 | -3.535274  | 4.855619  | -2.707343 |
| 128 | 6  | 0 | -6.556987 | 3.623427  | -1.962178 | 184 | 1 | 0 | -3.606354  | 0.371523  | -5.030069 |
| 129 | 1  | 0 | -5.191734 | 4.994965  | -1.023051 | 185 | 7 | 0 | -1.334590  | -3.417653 | -3.454940 |
| 130 | 6  | 0 | -4.798227 | 4.624680  | 1.897325  | 186 | 7 | 0 | -1.419306  | -5.306409 | -1.580175 |
| 131 | 1  | 0 | -8.043071 | -2.446206 | 3.946629  | 187 | 7 | 0 | -1.162733  | 1.306502  | -4.360126 |
| 132 | 6  | 0 | -7.814119 | -2.657427 | 1.850988  | 188 | 7 | 0 | -1.073088  | 3.693723  | -3.217568 |
| 133 | 8  | 0 | -6.063691 | -1.404975 | 4.606002  | 189 | 7 | 0 | -1.201354  | 5.245354  | 1.499368  |
| 134 | 6  | 0 | -7.784995 | 0.645773  | -3.128748 | 190 | 7 | 0 | -1.136810  | 3.345024  | 3.351661  |
| 135 | 1  | 0 | -7.958133 | 2.604172  | -3.917870 | 191 | 7 | 0 | -1.209226  | -1.401180 | 4.504208  |
| 136 | 8  | 0 | -5.963499 | 3.841337  | -3.232903 | 192 | 7 | 0 | -1.213751  | -3.682424 | 3.149926  |
| 137 | 6  | 0 | -8.381794 | -2.547925 | 0.570126  | 193 | 1 | 0 | -9.239451  | -1.893049 | 0.444013  |
| 138 | 6  | 0 | -6.692303 | -3.496510 | 1.972882  | 194 | 1 | 0 | -9.277287  | 0.532474  | 2.006554  |
| 139 | 6  | 0 | -4.815136 | -1.910509 | 4.234736  | 195 | 1 | 0 | -9.083093  | 2.022667  | -0.394938 |
| 140 | 6  | 0 | -2.337287 | 3.724887  | 2.959620  | 196 | 1 | 0 | -9.327112  | -0.316809 | -1.978270 |
| 141 | 6  | 0 | -8.404015 | -0.468537 | -2.530606 | 197 | 6 | 0 | -10.034025 | -2.931526 | -1.912671 |
| 142 | 6  | 0 | -6.603619 | 0.413077  | -3.849010 | 198 | 1 | 0 | -10.439104 | -3.849797 | -1.476747 |
| 143 | 6  | 0 | -4.715498 | 3.246999  | -3.470613 | 199 | 6 | 0 | -9.846600  | 2.142195  | -3.003676 |
| 144 | 6  | 0 | -2.369319 | 4.781071  | 1.911275  | 200 | 1 | 0 | -10.282428 | 1.639378  | -2.133976 |
| 145 | 6  | 0 | -7.886343 | -3.216857 | -0.564062 | 201 | 1 | 0 | -10.253647 | 1.665823  | -3.901153 |
| 146 | 6  | 0 | -6.193570 | -4.212256 | 0.887152  | 202 | 6 | 0 | -9.873254  | 3.170116  | 1.940817  |
| 147 | 8  | 0 | -6.095740 | -3.708041 | 3.240798  | 203 | 1 | 0 | -10.285750 | 2.348212  | 1.346335  |
| 148 | 6  | 0 | -4.830391 | -3.161449 | 3.485598  | 204 | 1 | 0 | -10.236393 | 4.105886  | 1.505279  |
| 149 | 6  | 0 | -7.870877 | -1.768746 | -2.611378 | 205 | 6 | 0 | -9.917887  | -1.883209 | 3.061616  |

|     |    |   |            |           |           |
|-----|----|---|------------|-----------|-----------|
| 206 | 1  | 0 | -10.340262 | -1.354110 | 2.200933  |
| 207 | 1  | 0 | -10.283084 | -1.387536 | 3.966488  |
| 208 | 52 | 0 | 0.346577   | -2.566949 | 3.867376  |
| 209 | 52 | 0 | 0.381791   | 4.359648  | 2.471788  |
| 210 | 52 | 0 | 0.158257   | -4.467130 | -2.587132 |
| 211 | 52 | 0 | 0.437277   | 2.455751  | -3.860152 |
| 212 | 1  | 0 | -10.177419 | 3.184932  | -2.981170 |
| 213 | 1  | 0 | -10.410393 | -2.090931 | -1.320345 |
| 214 | 1  | 0 | -10.273225 | 3.079170  | 2.955637  |
| 215 | 1  | 0 | -10.306086 | -2.906113 | 3.043121  |
| 216 | 1  | 0 | -10.428762 | -2.823442 | -2.927769 |
| 217 | 6  | 0 | -6.115089  | 0.043920  | -0.009620 |
| 218 | 6  | 0 | -4.755013  | -0.614406 | 0.242238  |
| 219 | 1  | 0 | -6.942508  | -0.666299 | 0.037848  |
| 220 | 1  | 0 | -6.298232  | 0.829489  | 0.733332  |
| 221 | 1  | 0 | -6.127277  | 0.516136  | -1.000270 |
| 222 | 6  | 0 | -3.688165  | 0.490225  | 0.189253  |
| 223 | 1  | 0 | -4.740413  | -1.118856 | 1.220346  |
| 224 | 1  | 0 | -4.552628  | -1.381079 | -0.521125 |
| 225 | 1  | 0 | -3.825546  | 1.058076  | -0.742539 |
| 226 | 1  | 0 | -3.860772  | 1.196577  | 1.014821  |
| 227 | 6  | 0 | -2.262404  | -0.038639 | 0.247036  |
| 228 | 1  | 0 | -2.031608  | -0.730851 | -0.565833 |
| 229 | 1  | 0 | -1.994900  | -0.489481 | 1.207170  |
| 230 | 53 | 0 | -0.900335  | 1.641491  | -0.030679 |
| 231 | 6  | 0 | 2.385526   | -0.461518 | 0.906968  |
| 232 | 1  | 0 | 1.926707   | 0.531757  | 0.897669  |
| 233 | 1  | 0 | 2.446938   | -0.841729 | 1.931813  |
| 234 | 6  | 0 | 3.713593   | -0.525556 | 0.164538  |
| 235 | 6  | 0 | 4.781085   | 0.423011  | 0.721792  |
| 236 | 1  | 0 | 3.550049   | -0.278963 | -0.893958 |
| 237 | 1  | 0 | 4.100820   | -1.555511 | 0.190278  |
| 238 | 6  | 0 | 6.047037   | 0.255289  | -0.124451 |
| 239 | 1  | 0 | 4.425823   | 1.463580  | 0.682039  |
| 240 | 1  | 0 | 4.989678   | 0.192030  | 1.777056  |
| 241 | 1  | 0 | 6.833797   | 0.948273  | 0.170270  |
| 242 | 1  | 0 | 6.446630   | -0.762374 | -0.027804 |
| 243 | 1  | 0 | 5.818390   | 0.430105  | -1.184863 |
| 244 | 53 | 0 | 0.993509   | -1.765815 | -0.141750 |

---

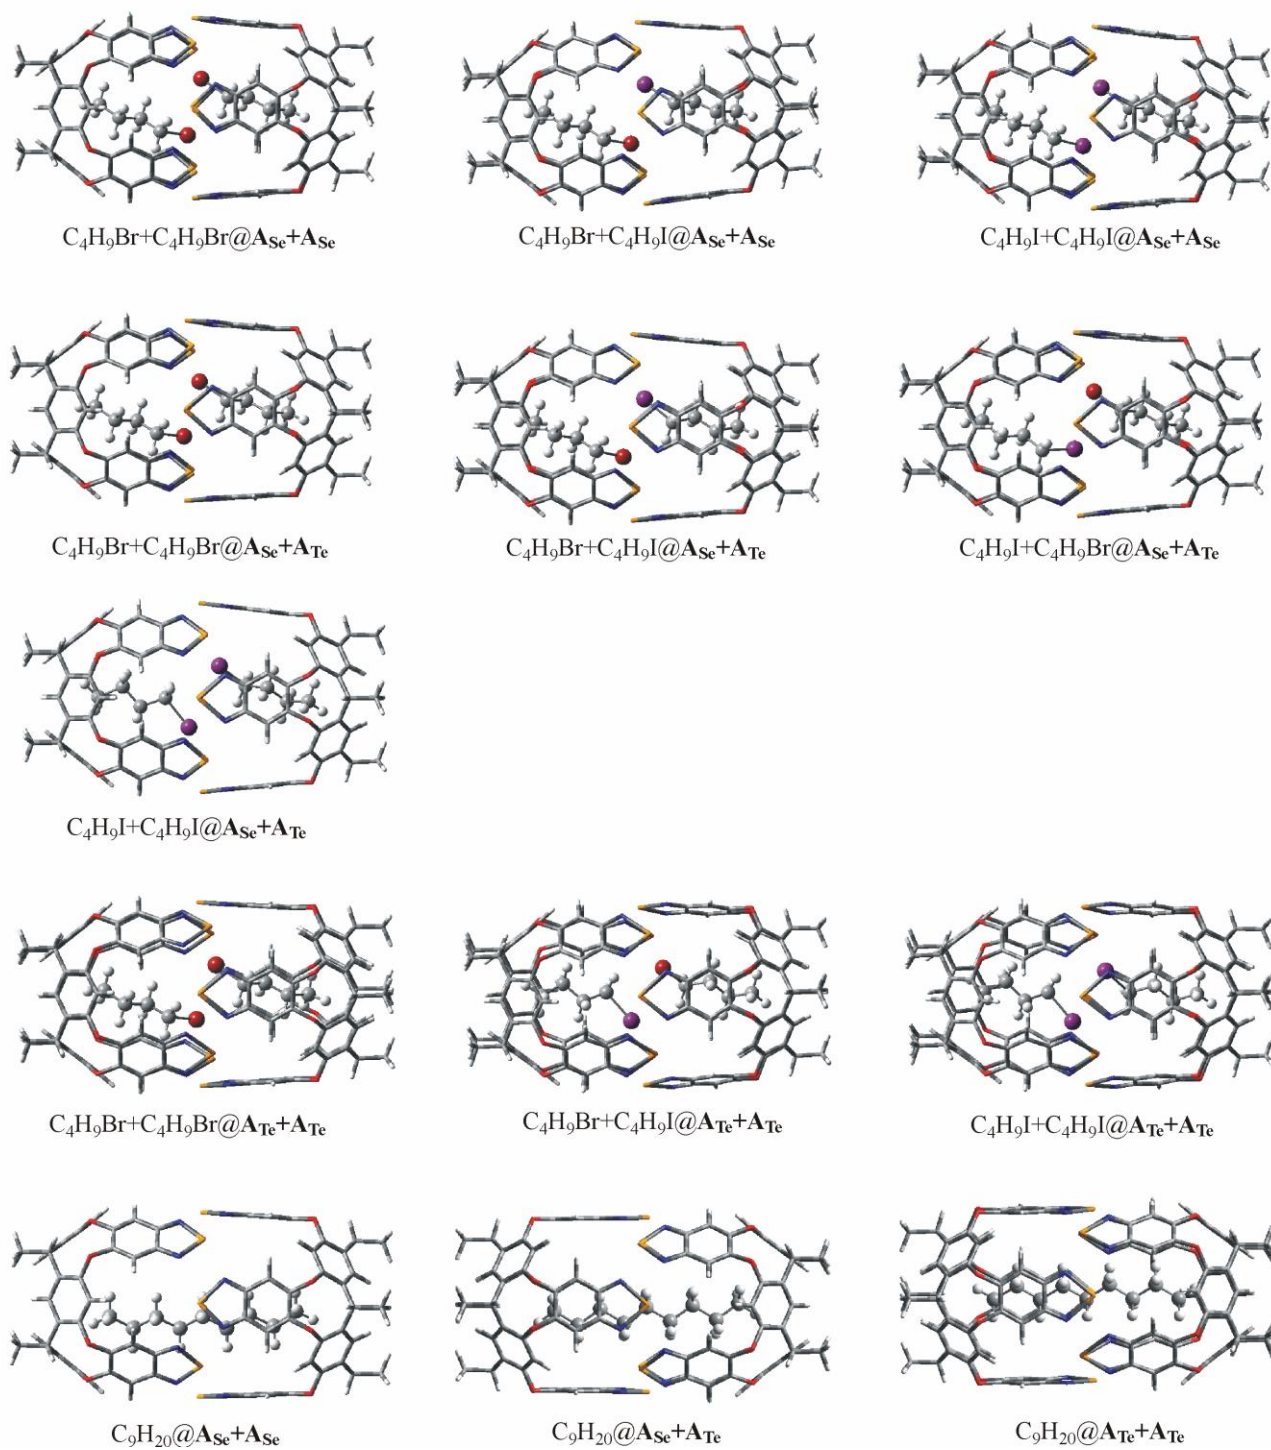

**Figure 1S.** Calculated encapsulated complexes  $C_4H_9X+C_4H_9X'@A'Y+A'Y'$ , where X, X' = Br, I and Y, Y' = Se, Te.



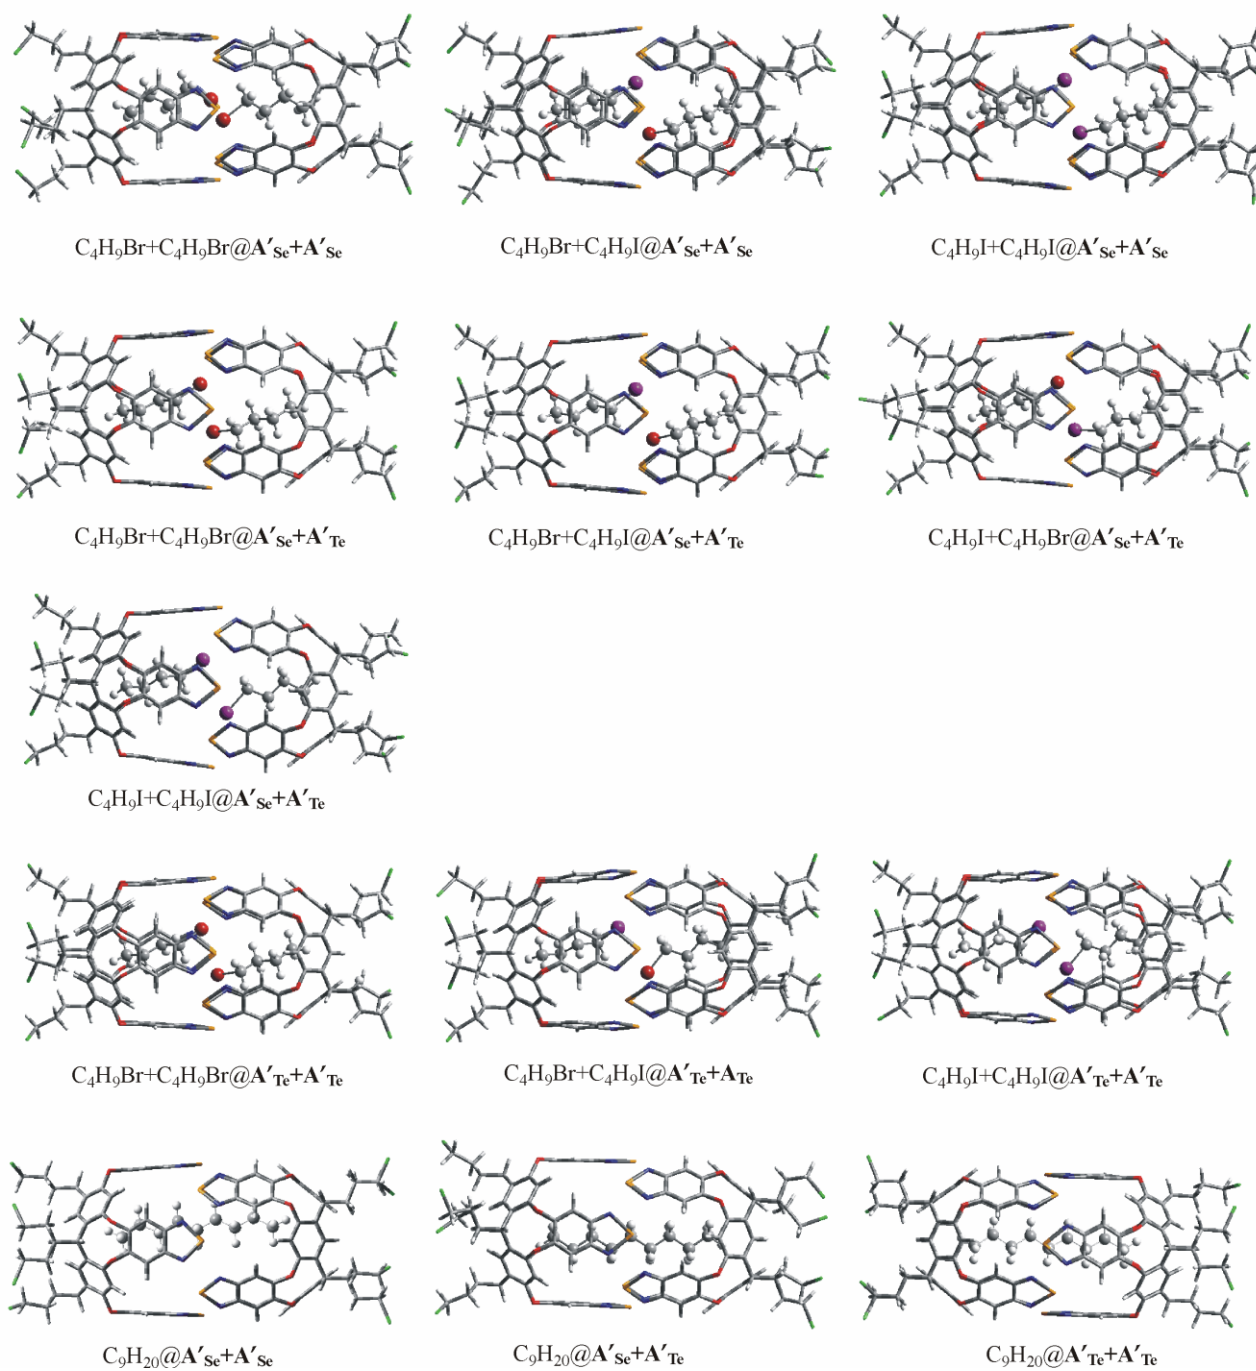

**Figure 2S.** Calculated encapsulated complexes  $C_4H_9X+ C_4H_9X'@A'Y+A'Y'$ , where X, X' = Br, I and Y, Y' = Se, Te.

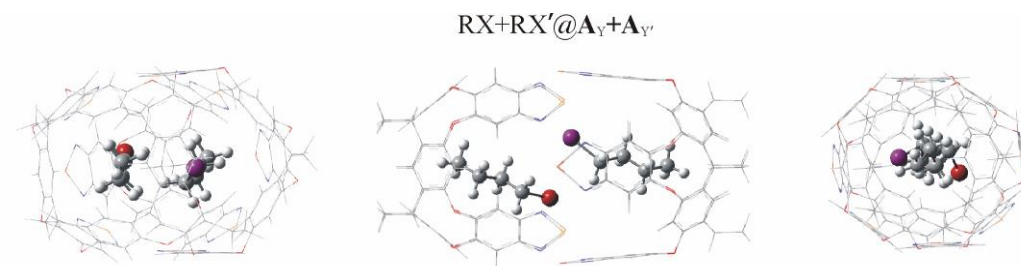

**Figure 3S.** Encapsulated complexes  $RX+RX'@A_Y+A_{Y'}$ , where  $X, X' = Br, I$  and  $Y, Y' = Se, Te$  from three points of view.

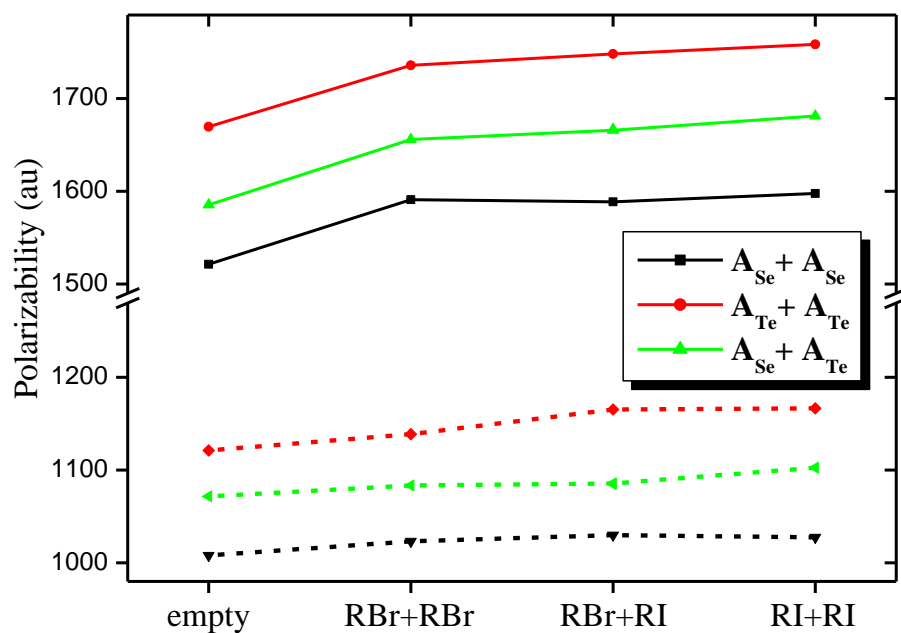

**Figure 4S.** Isotropic (Solid lines) and Anisotropic (Dot lines) polarizabilities of the encapsulated  $C_4H_9X+ C_4H_9X'@A_Y+A_{Y'}$  complexes with respect to the encapsulated contents at M06-2X/6-31G(d,p).

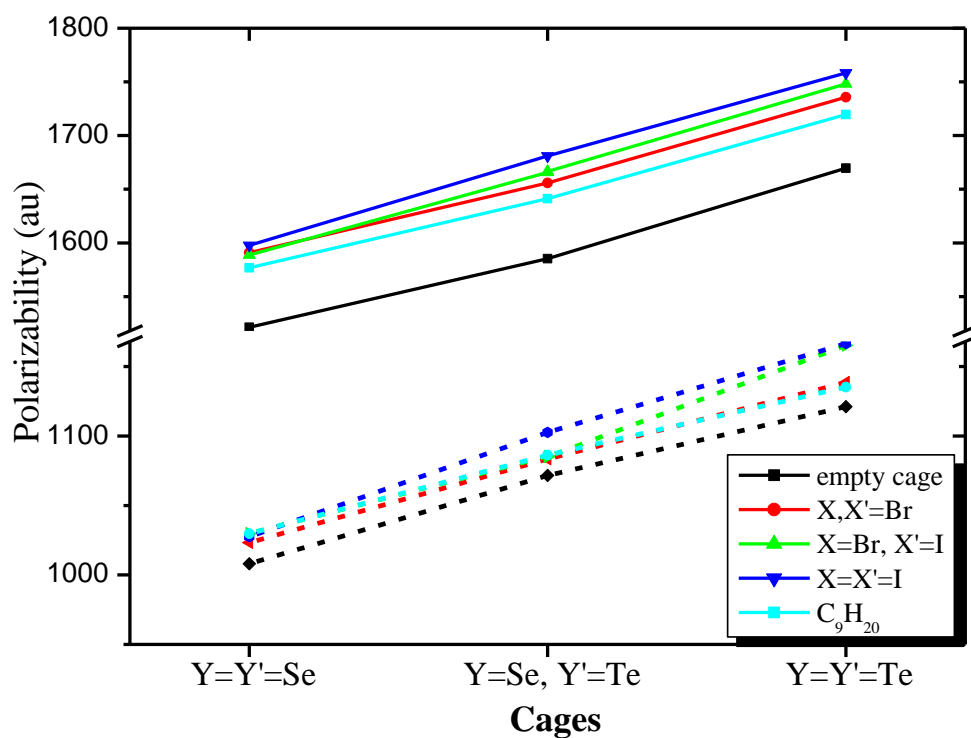

**Figure 5S.** Isotropic (Solid lines) and Anisotropic (Dot lines) polarizabilities of the encapsulated  $RX+RX'@A_Y+A_{Y'}$  complexes with respect to the cages at M06-2X/6-31G(d,p).

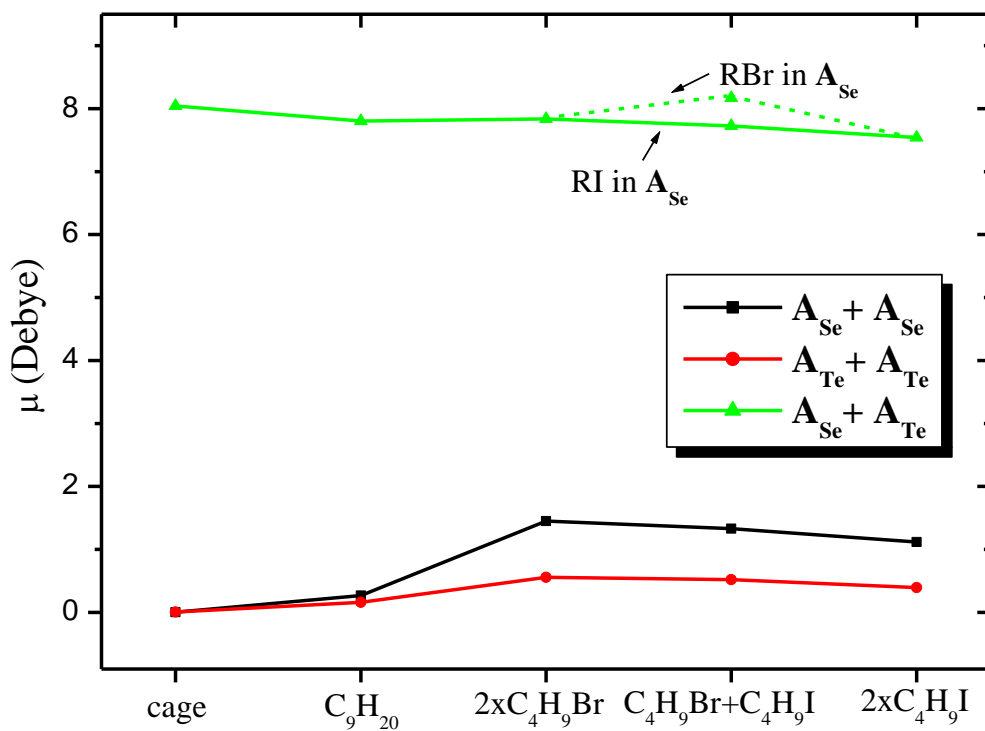

**Figure 6S.** Dipole moments  $\mu$  of the encapsulated  $C_9H_{20}$ ,  $C_4H_9X+C_4H_9X'@A_Y+A_{Y'}$  complexes at M06-2X/6-31G(d,p).

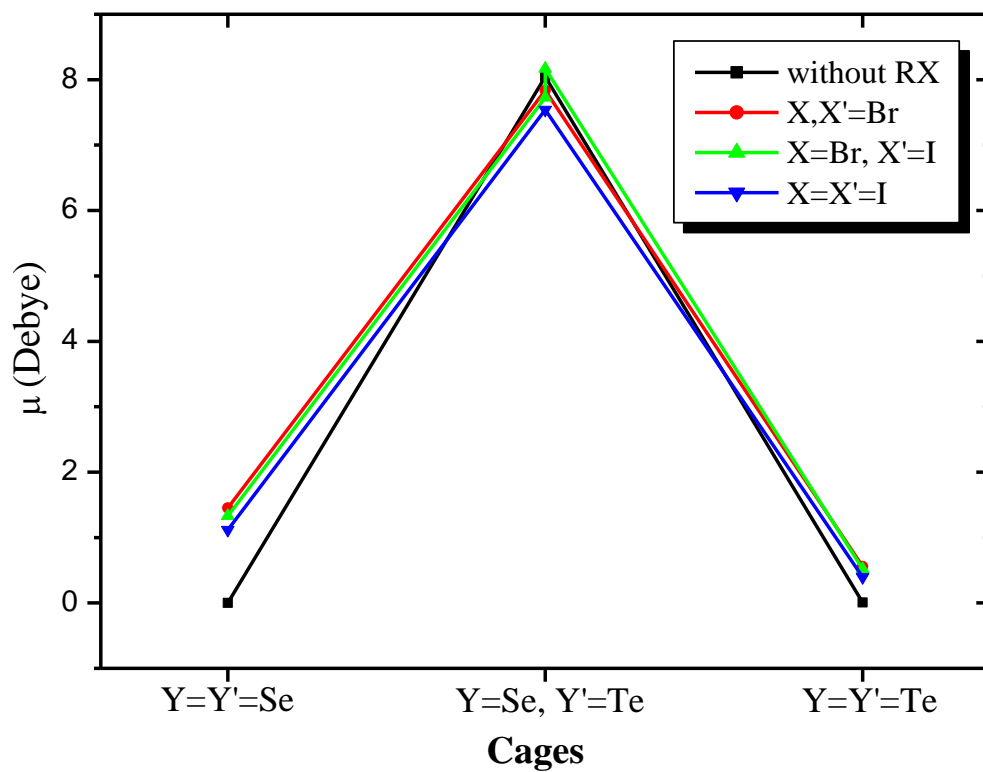

**Figure 7S.** Dipole moments  $\mu$  of the encapsulated  $C_4H_9X + C_4H_9X' @ A_Y + A_{Y'}$  complexes with respect to the cages at M06-2X/6-31G(d,p).

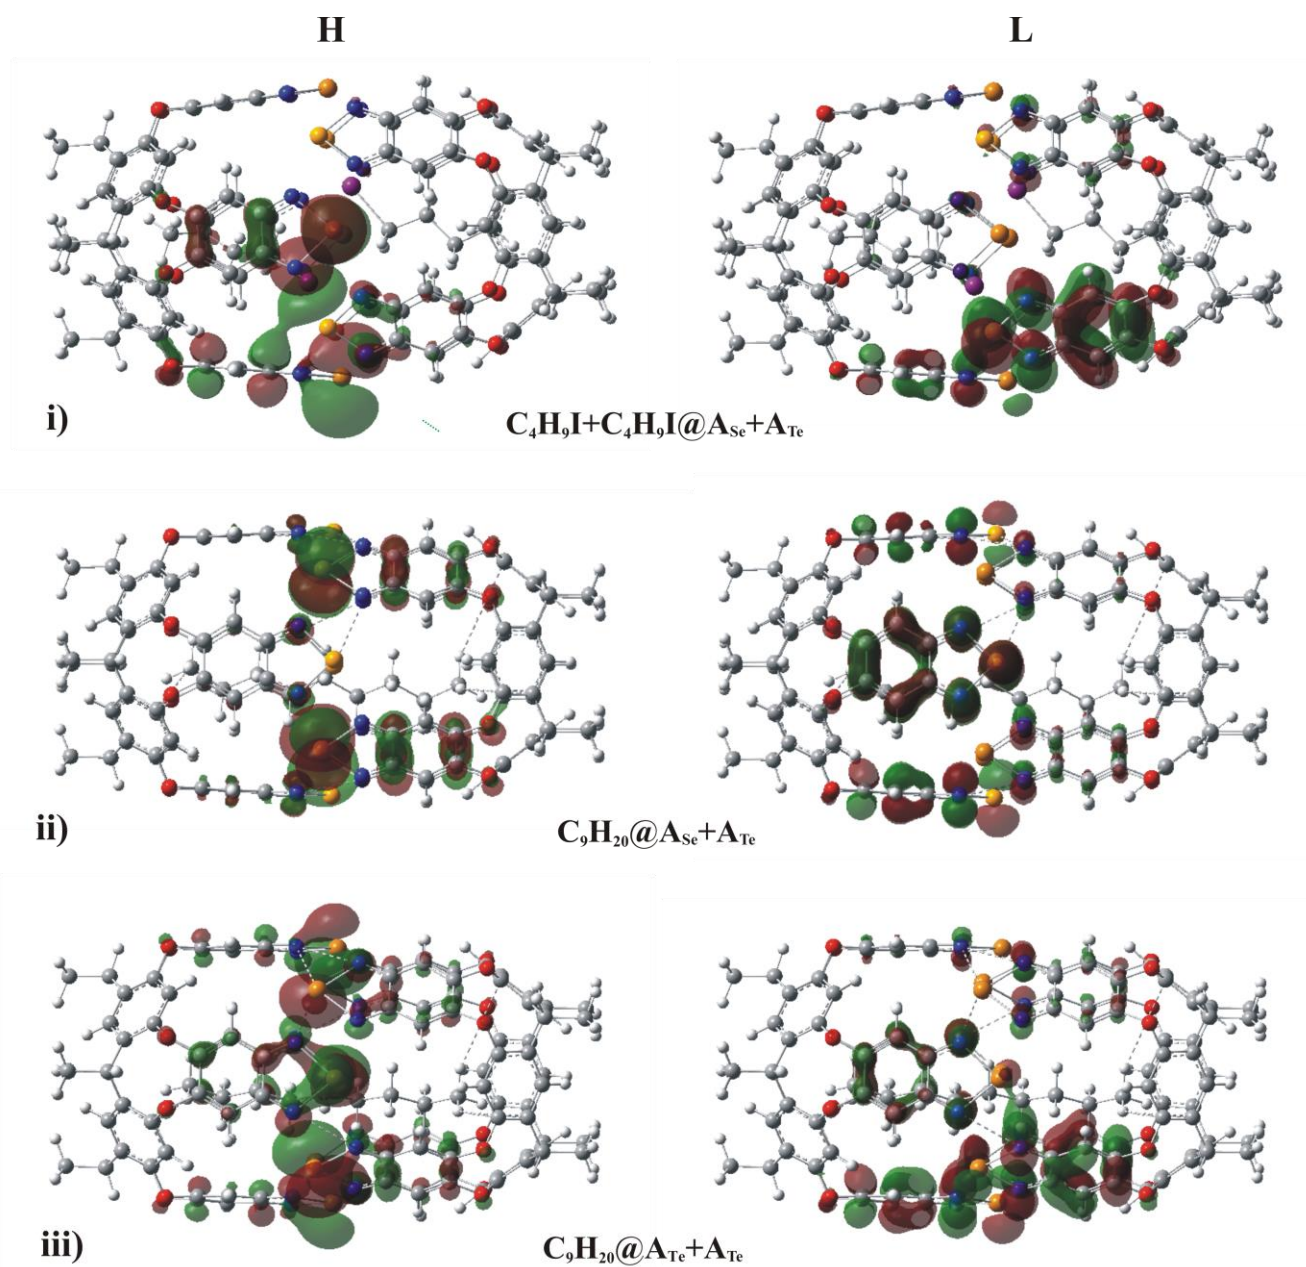

**Fig. 8S.** Molecular HOMO and LUMO MO of  $C_4H_9I + C_4H_9I @ A_{Se} + A_{Te}$ ,  $n-C_9H_{20} @ A_{Se} + A_{Te}$ , and  $n-C_9H_{20} @ A_{Te} + A_{Te}$  complexes at M06-2X/6-31G(d,p)<sub>C,H,O,N,Se,Br</sub>/LANL2TZ<sub>I,Te</sub>

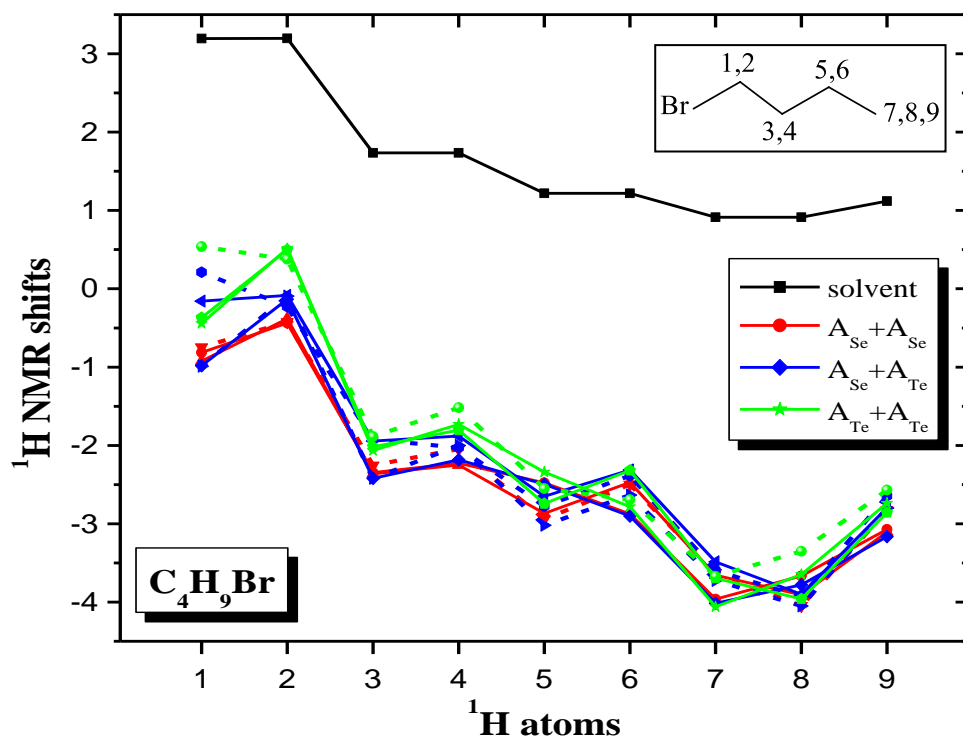

**Figure 9S.**  $^1\text{H}$  NMR shifts (ppm) of the  $1\text{-C}_4\text{H}_9\text{Br}$  compound encapsulated and in solvent at M06-2X/6-31G(d,p) level of theory;  $A(\text{R}=\text{CH}_3)$ .

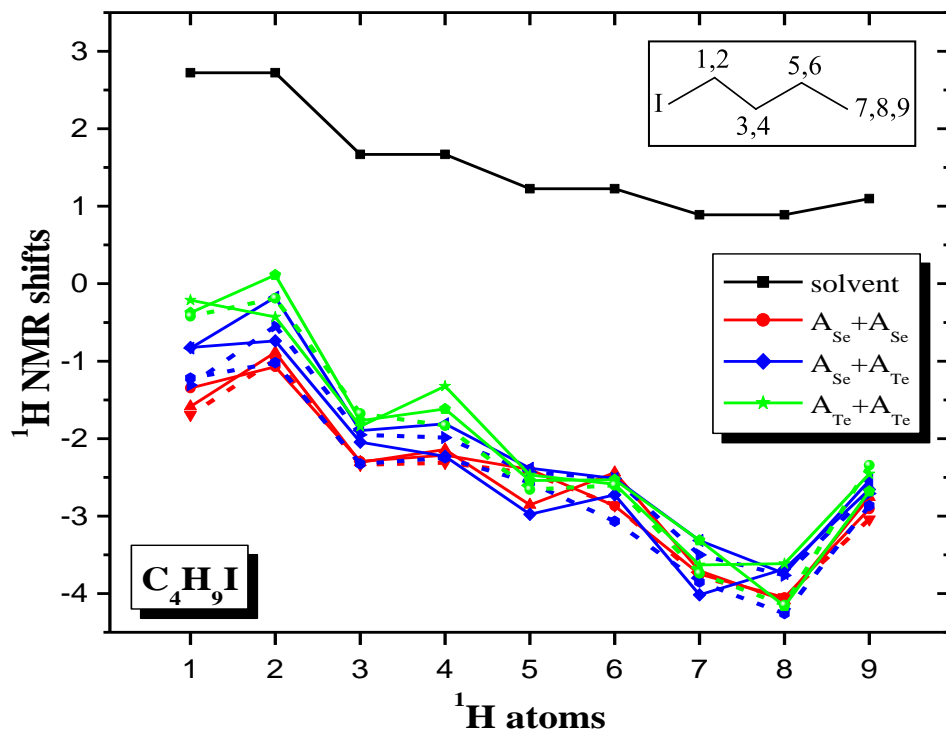

**Figure 10S.**  $^1\text{H}$  NMR shifts (ppm) of the  $1\text{-C}_4\text{H}_9\text{I}$  compound encapsulated and in solvent at M06-2X/6-31G(d,p) level of theory;  $A(\text{R}=\text{CH}_3)$ .

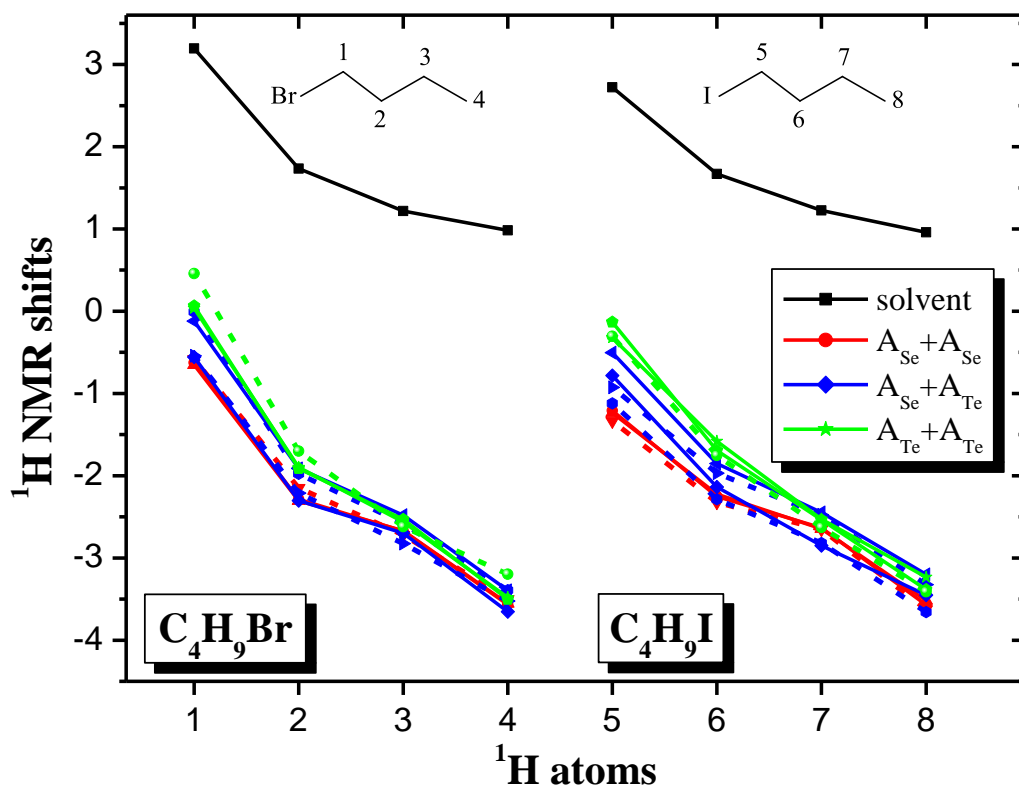

**Figure 11S.**  $^1\text{H}$  NMR shifts (ppm) of the 1- $\text{C}_4\text{H}_9\text{Br}$  and 1- $\text{C}_4\text{H}_9\text{I}$  compounds encapsulated and in solvent at M06-2X/6-31G(d,p) level of theory. Average  $^1\text{H}$  NMR for the same C; A(R=CH<sub>3</sub>).

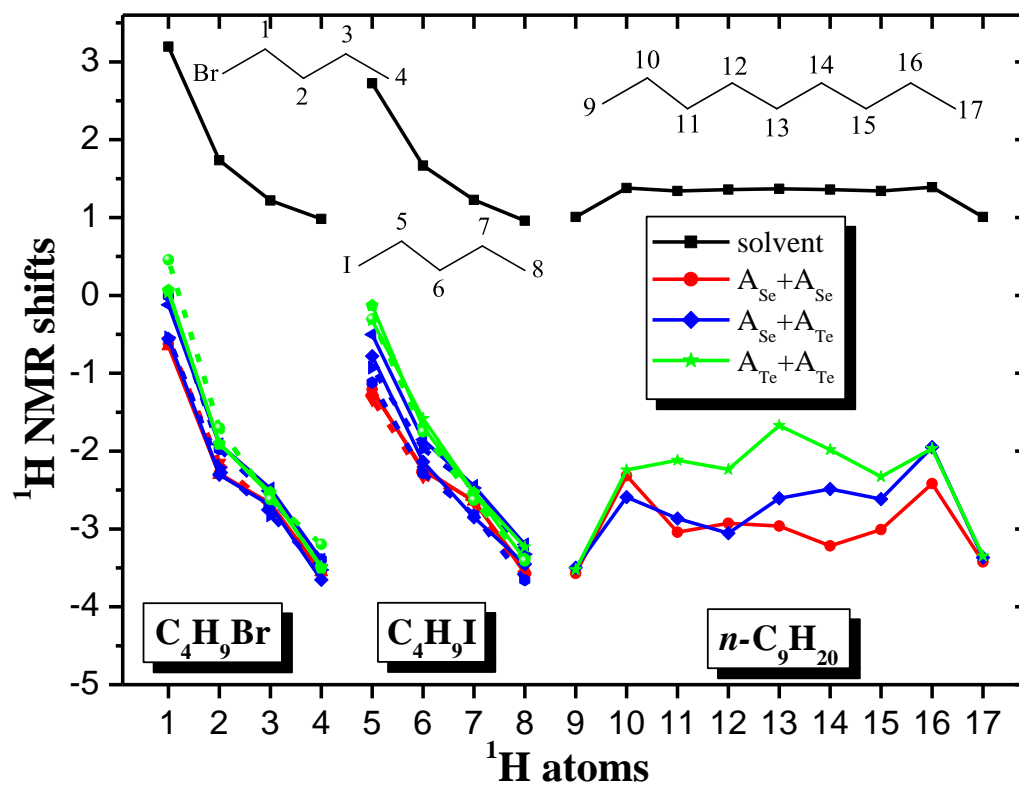

**Figure 12S.**  $^1\text{H}$  NMR shifts (ppm) of the 1- $\text{C}_4\text{H}_9\text{Br}$ , 1- $\text{C}_4\text{H}_9\text{I}$  and  $n\text{-C}_9\text{H}_{20}$  compounds encapsulated and in solvent at M06-2X/6-31G(d,p). Average  $^1\text{H}$  NMR for the same C; A(R=CH<sub>3</sub>).

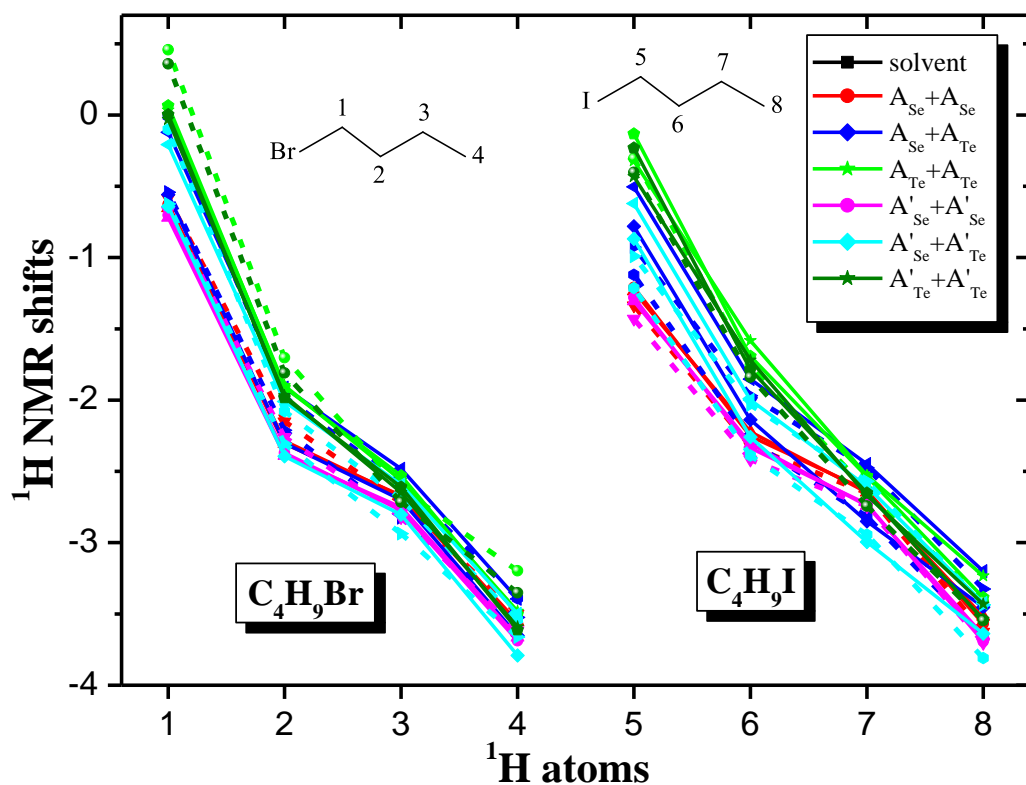

**Figure 13S.**  $^1\text{H}$  NMR shifts (ppm) of the 1- $\text{C}_4\text{H}_9\text{Br}$  and 1- $\text{C}_4\text{H}_9\text{I}$  encapsulated compounds at M06-2X/6-31G(d,p). Average  $^1\text{H}$  NMR for the same C; A(R= $\text{CH}_3$ ); A'(R= $\text{CH}_2\text{CH}_2\text{CH}_2\text{Cl}$ ).

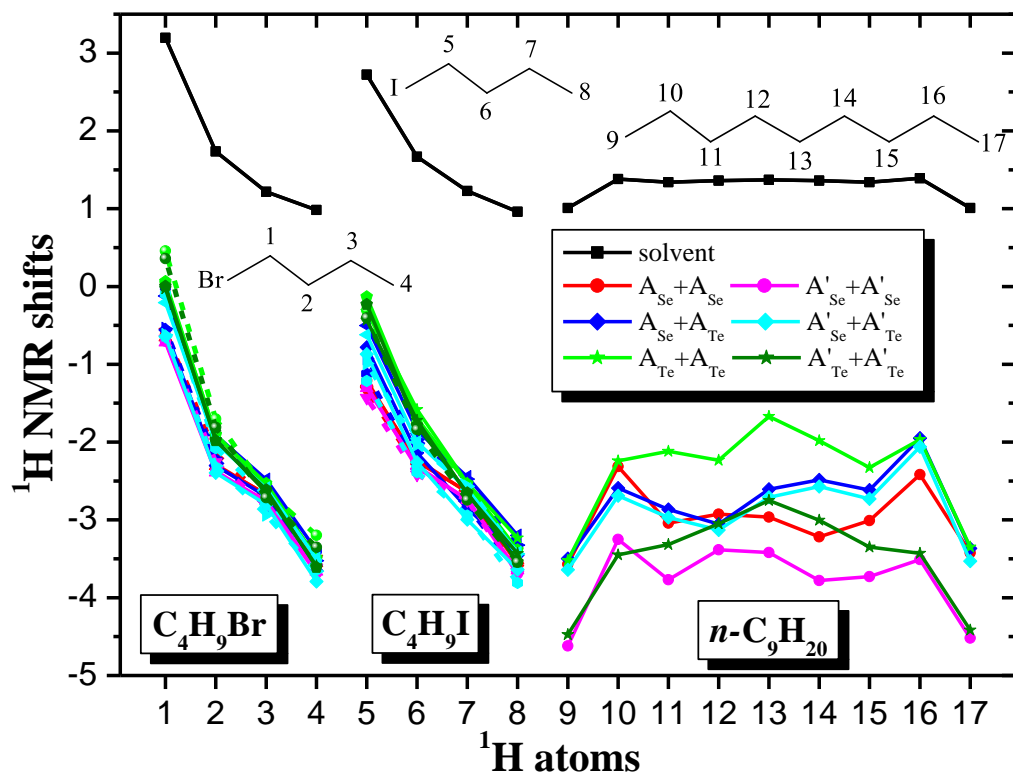

**Figure 14S.**  $^1\text{H}$  NMR shifts (ppm) of the 1- $\text{C}_4\text{H}_9\text{Br}$ , 1- $\text{C}_4\text{H}_9\text{I}$  and  $n\text{-C}_9\text{H}_{20}$  compounds encapsulated and in solvent at M06-2X/6-31G(d,p). Average  $^1\text{H}$  NMR for the same C; A(R= $\text{CH}_3$ ); A'(R= $\text{CH}_2\text{CH}_2\text{CH}_2\text{Cl}$ ).



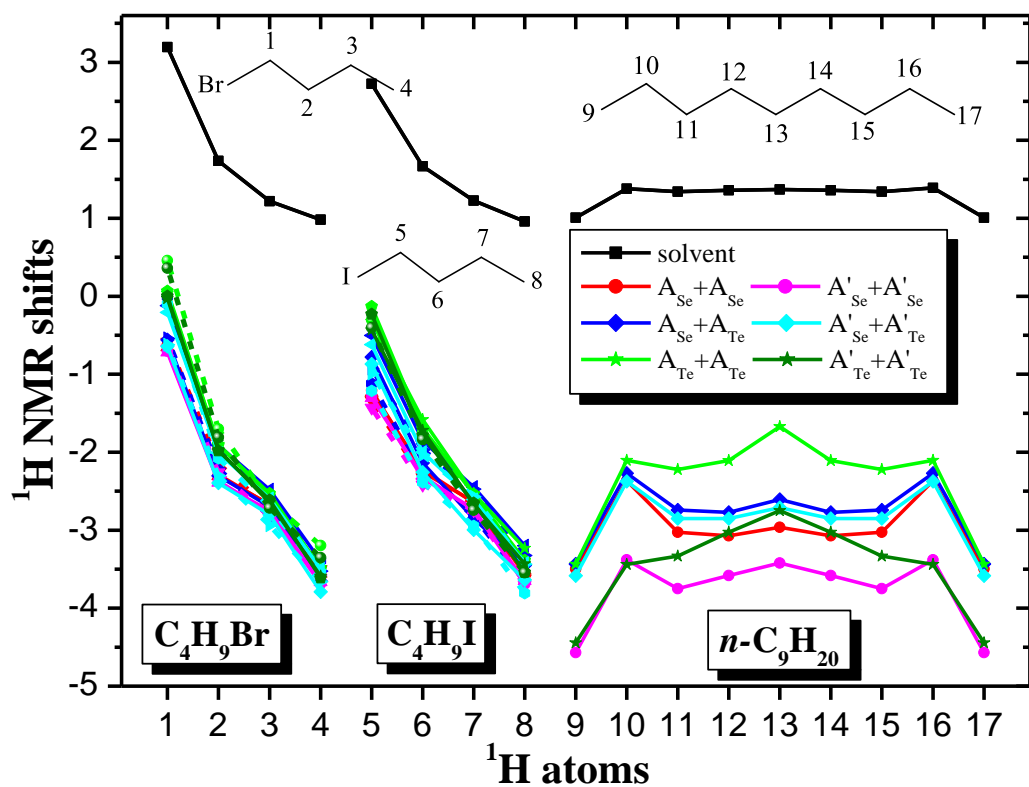

**Figure 15S.**  $^1\text{H}$  NMR shifts (ppm) of the 1- $\text{C}_4\text{H}_9\text{Br}$ , 1- $\text{C}_4\text{H}_9\text{I}$  and  $n\text{-C}_9\text{H}_{20}$  compounds encapsulated and in solvent at M06-2X/6-31G(d,p). Average  $^1\text{H}$  NMR for the same C and for the symmetric C atoms; A(R=CH<sub>3</sub>); A'(R=CH<sub>2</sub>CH<sub>2</sub>CH<sub>2</sub>Cl).

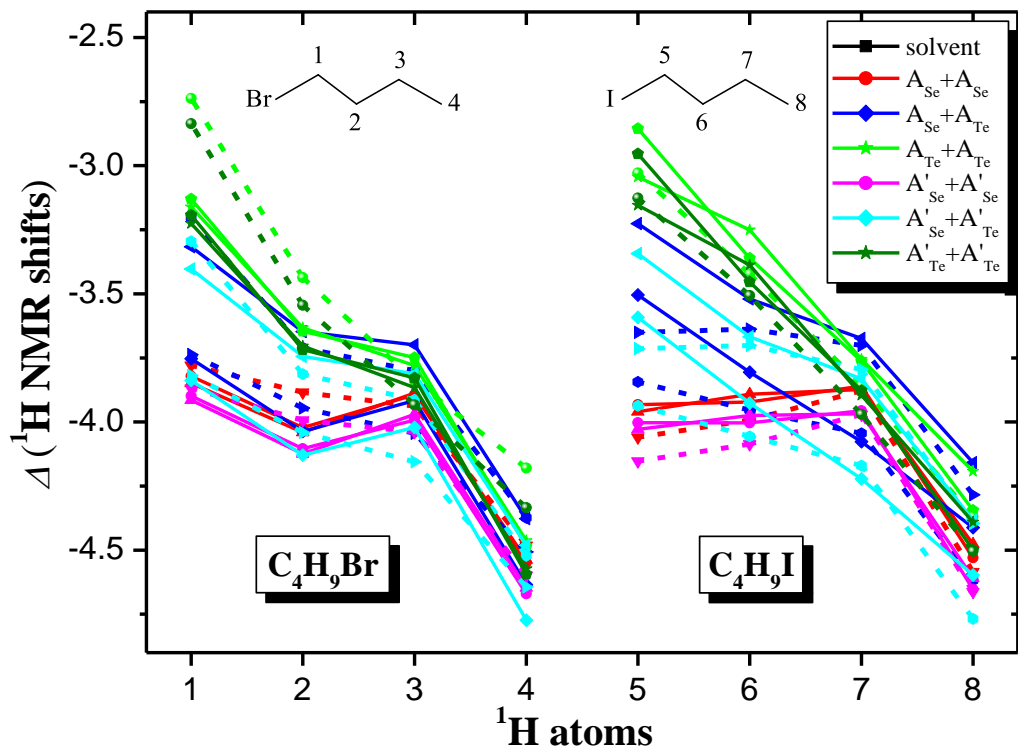

**Figure 16S.** Relative shifts of  $^1\text{H}$  NMR shifts (ppm) of the 1- $\text{C}_4\text{H}_9\text{Br}$  and 1- $\text{C}_4\text{H}_9\text{I}$  encapsulated compounds with respect to the free ones at M06-2X/6-31G(d,p). Average  $^1\text{H}$  NMR for the same C; A(R=CH<sub>3</sub>); A'(R=CH<sub>2</sub>CH<sub>2</sub>CH<sub>2</sub>Cl).

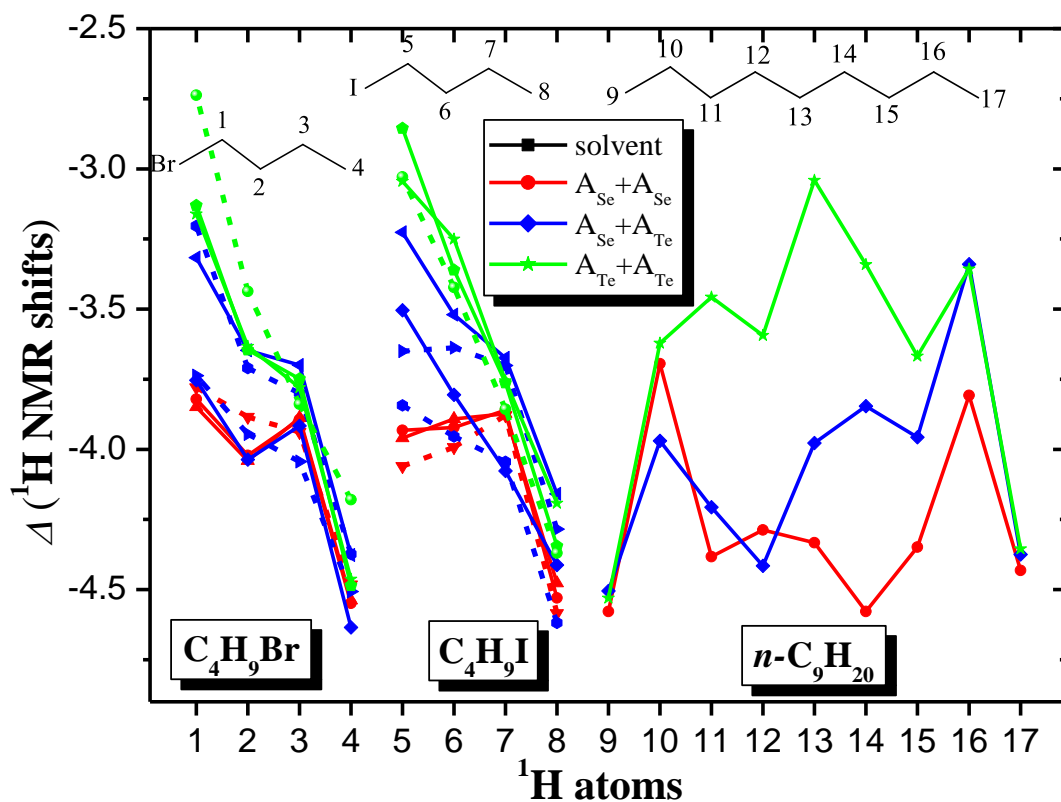

**Figure 17S.** Relative shifts of  $^1\text{H}$  NMR shifts (ppm) of the 1- $\text{C}_4\text{H}_9\text{Br}$ , 1- $\text{C}_4\text{H}_9\text{I}$  and  $n\text{-C}_9\text{H}_{20}$  encapsulated compounds with respect to the free ones at M06-2X/6-31G(d,p). Average  $^1\text{H}$  NMR for the same C; A(R= $\text{CH}_3$ ).

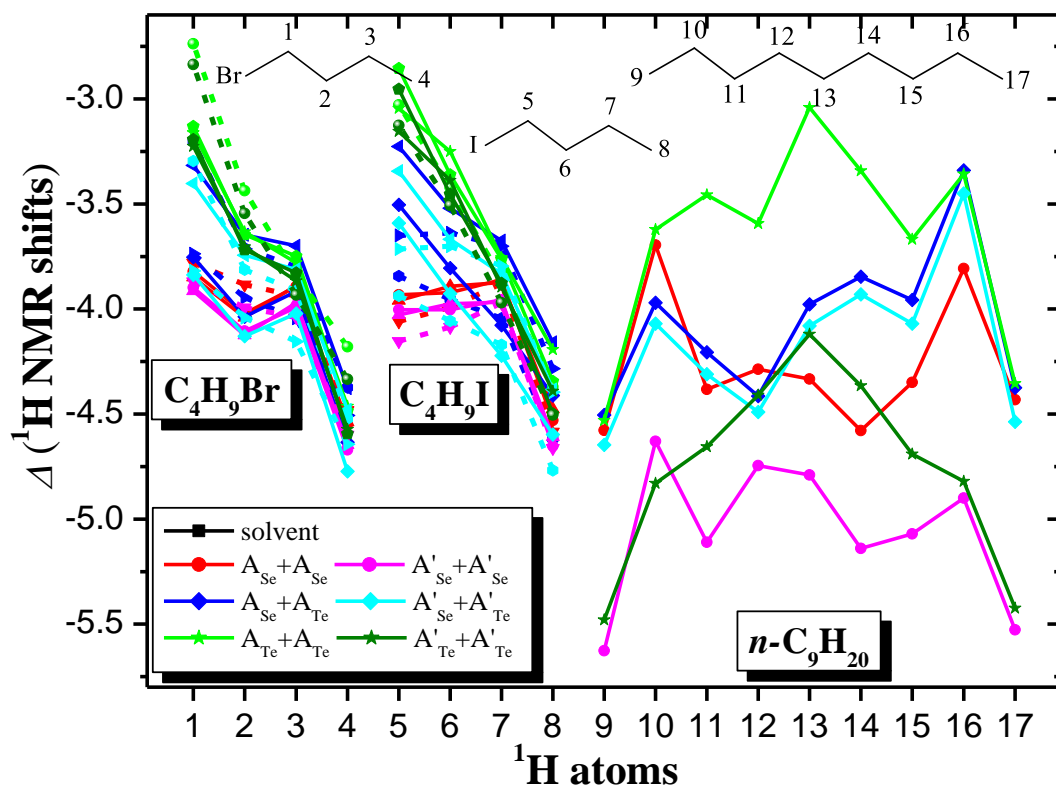

**Figure 18S.** Relative shifts of  $^1\text{H}$  NMR shifts (ppm) of the 1- $\text{C}_4\text{H}_9\text{Br}$ , 1- $\text{C}_4\text{H}_9\text{I}$  and  $n\text{-C}_9\text{H}_{20}$  encapsulated compounds with respect to the free ones at M06-2X/6-31G(d,p). Average  $^1\text{H}$  NMR for the same C; A(R= $\text{CH}_3$ ); A'(R= $\text{CH}_2\text{CH}_2\text{CH}_2\text{Cl}$ ).

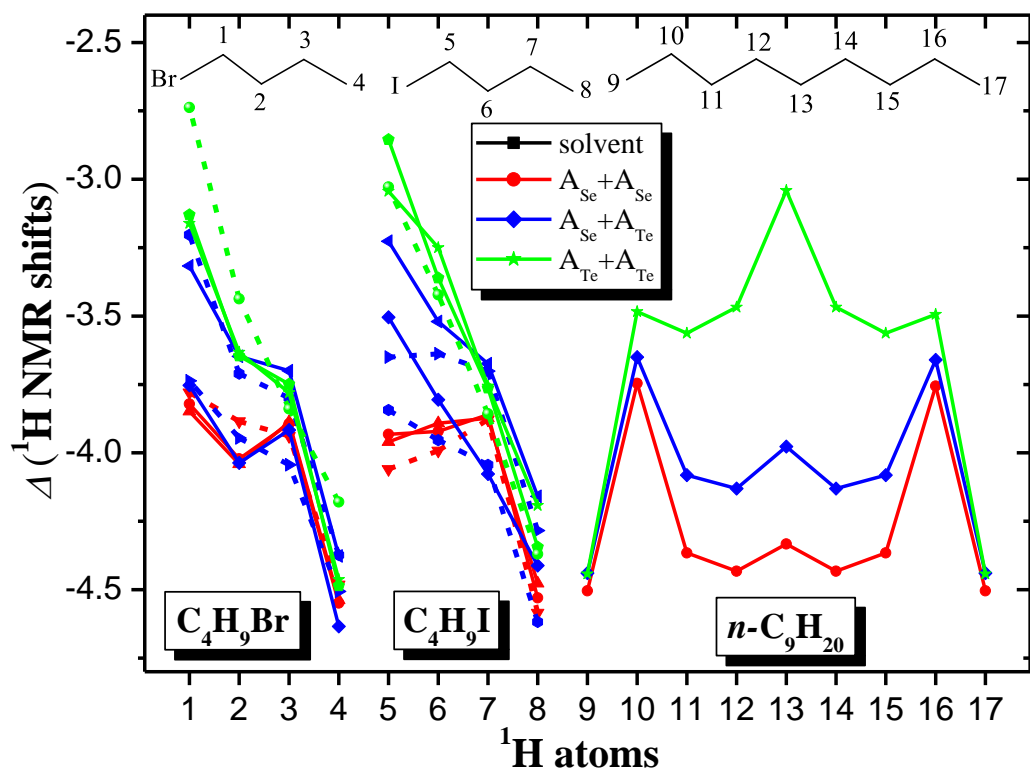

**Figure 19S.** Relative shifts of  $^1\text{H}$  NMR shifts (ppm) of the 1- $\text{C}_4\text{H}_9\text{Br}$ , 1- $\text{C}_4\text{H}_9\text{I}$  and  $n\text{-C}_9\text{H}_{20}$  encapsulated compounds with respect to the free compounds at M06-2X/6-31G(d,p). Average  $^1\text{H}$  NMR for the same C and for the symmetric C atoms;  $\text{A}(\text{R}=\text{CH}_3)$ .

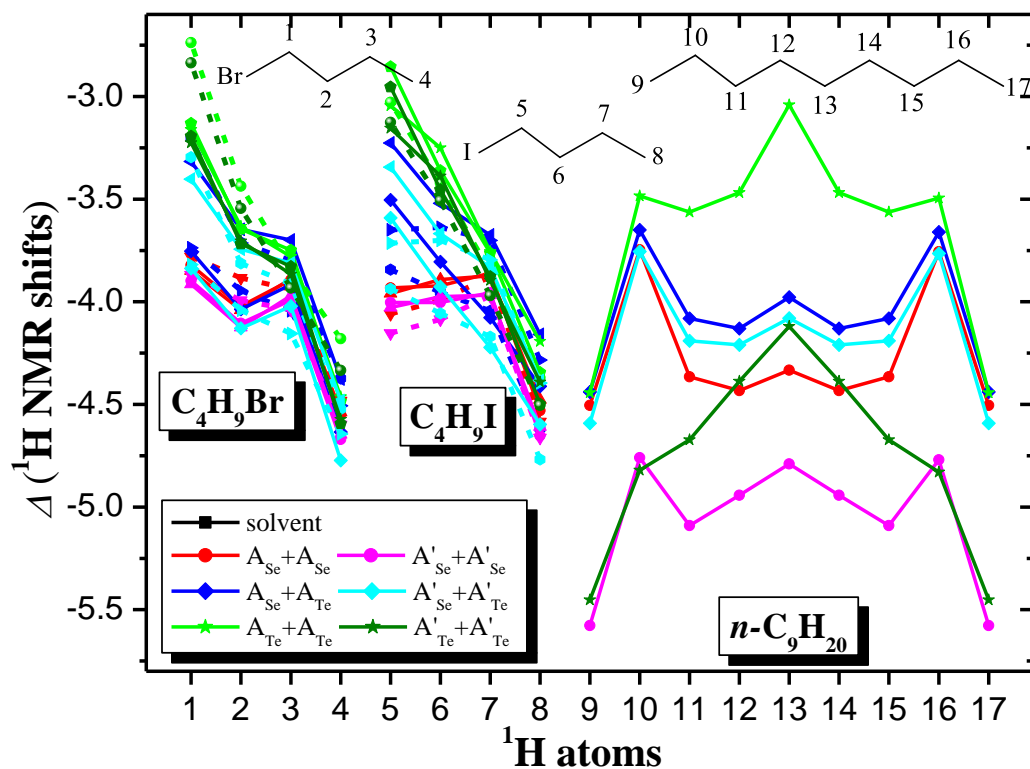

**Figure 20S.** Relative shifts of  $^1\text{H}$  NMR shifts (ppm) of the 1- $\text{C}_4\text{H}_9\text{Br}$ , 1- $\text{C}_4\text{H}_9\text{I}$  and  $n\text{-C}_9\text{H}_{20}$  encapsulated compounds with respect to the free compounds at M06-2X/6-31G(d,p). Average  $^1\text{H}$  NMR for the same C and for the symmetric C atoms;  $\text{A}(\text{R}=\text{CH}_3)$ ;  $\text{A}'(\text{R}=\text{CH}_2\text{CH}_2\text{CH}_2\text{Cl})$ .

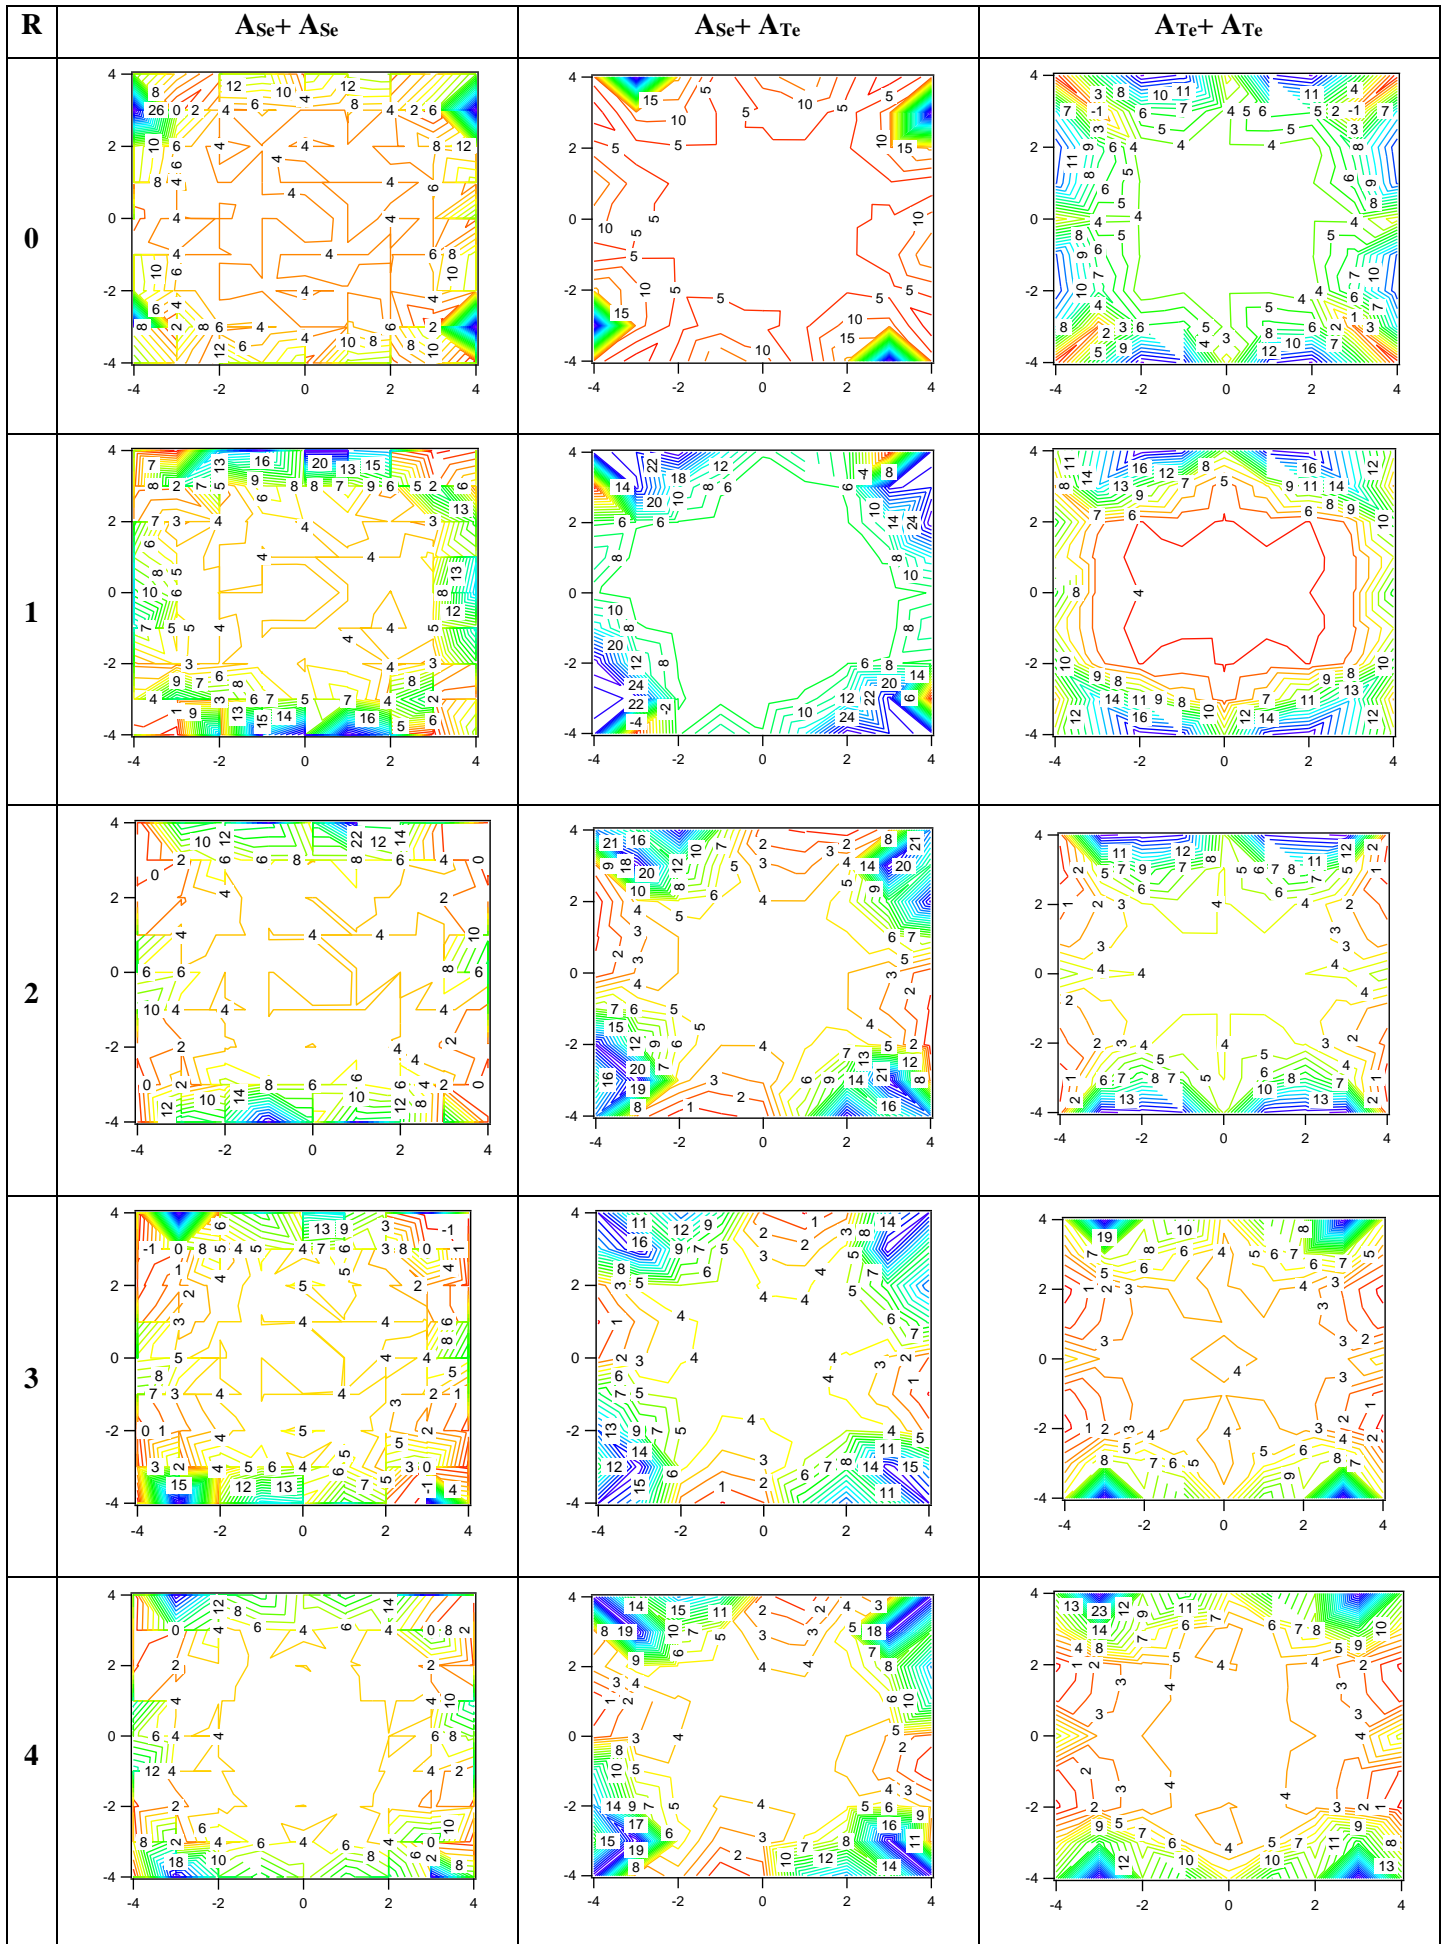

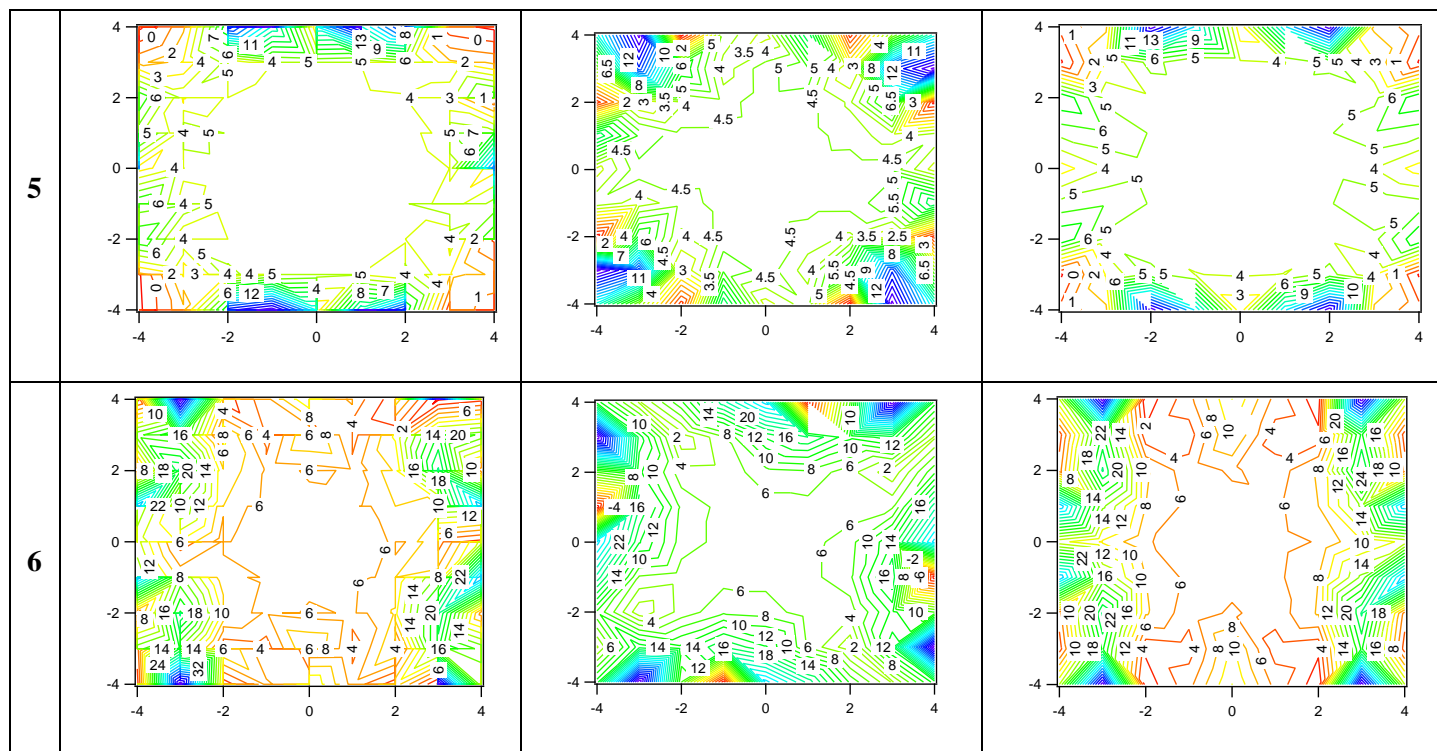

**Figure 21S.** Magnetic isotropy of  $A_X + A_X$  complexes, where  $X = O, S, Se$  and  $Te$ . Contour on the  $XY$  plane at distances  $R$  from the center of the cage along the main  $Z$  axis of the cage.



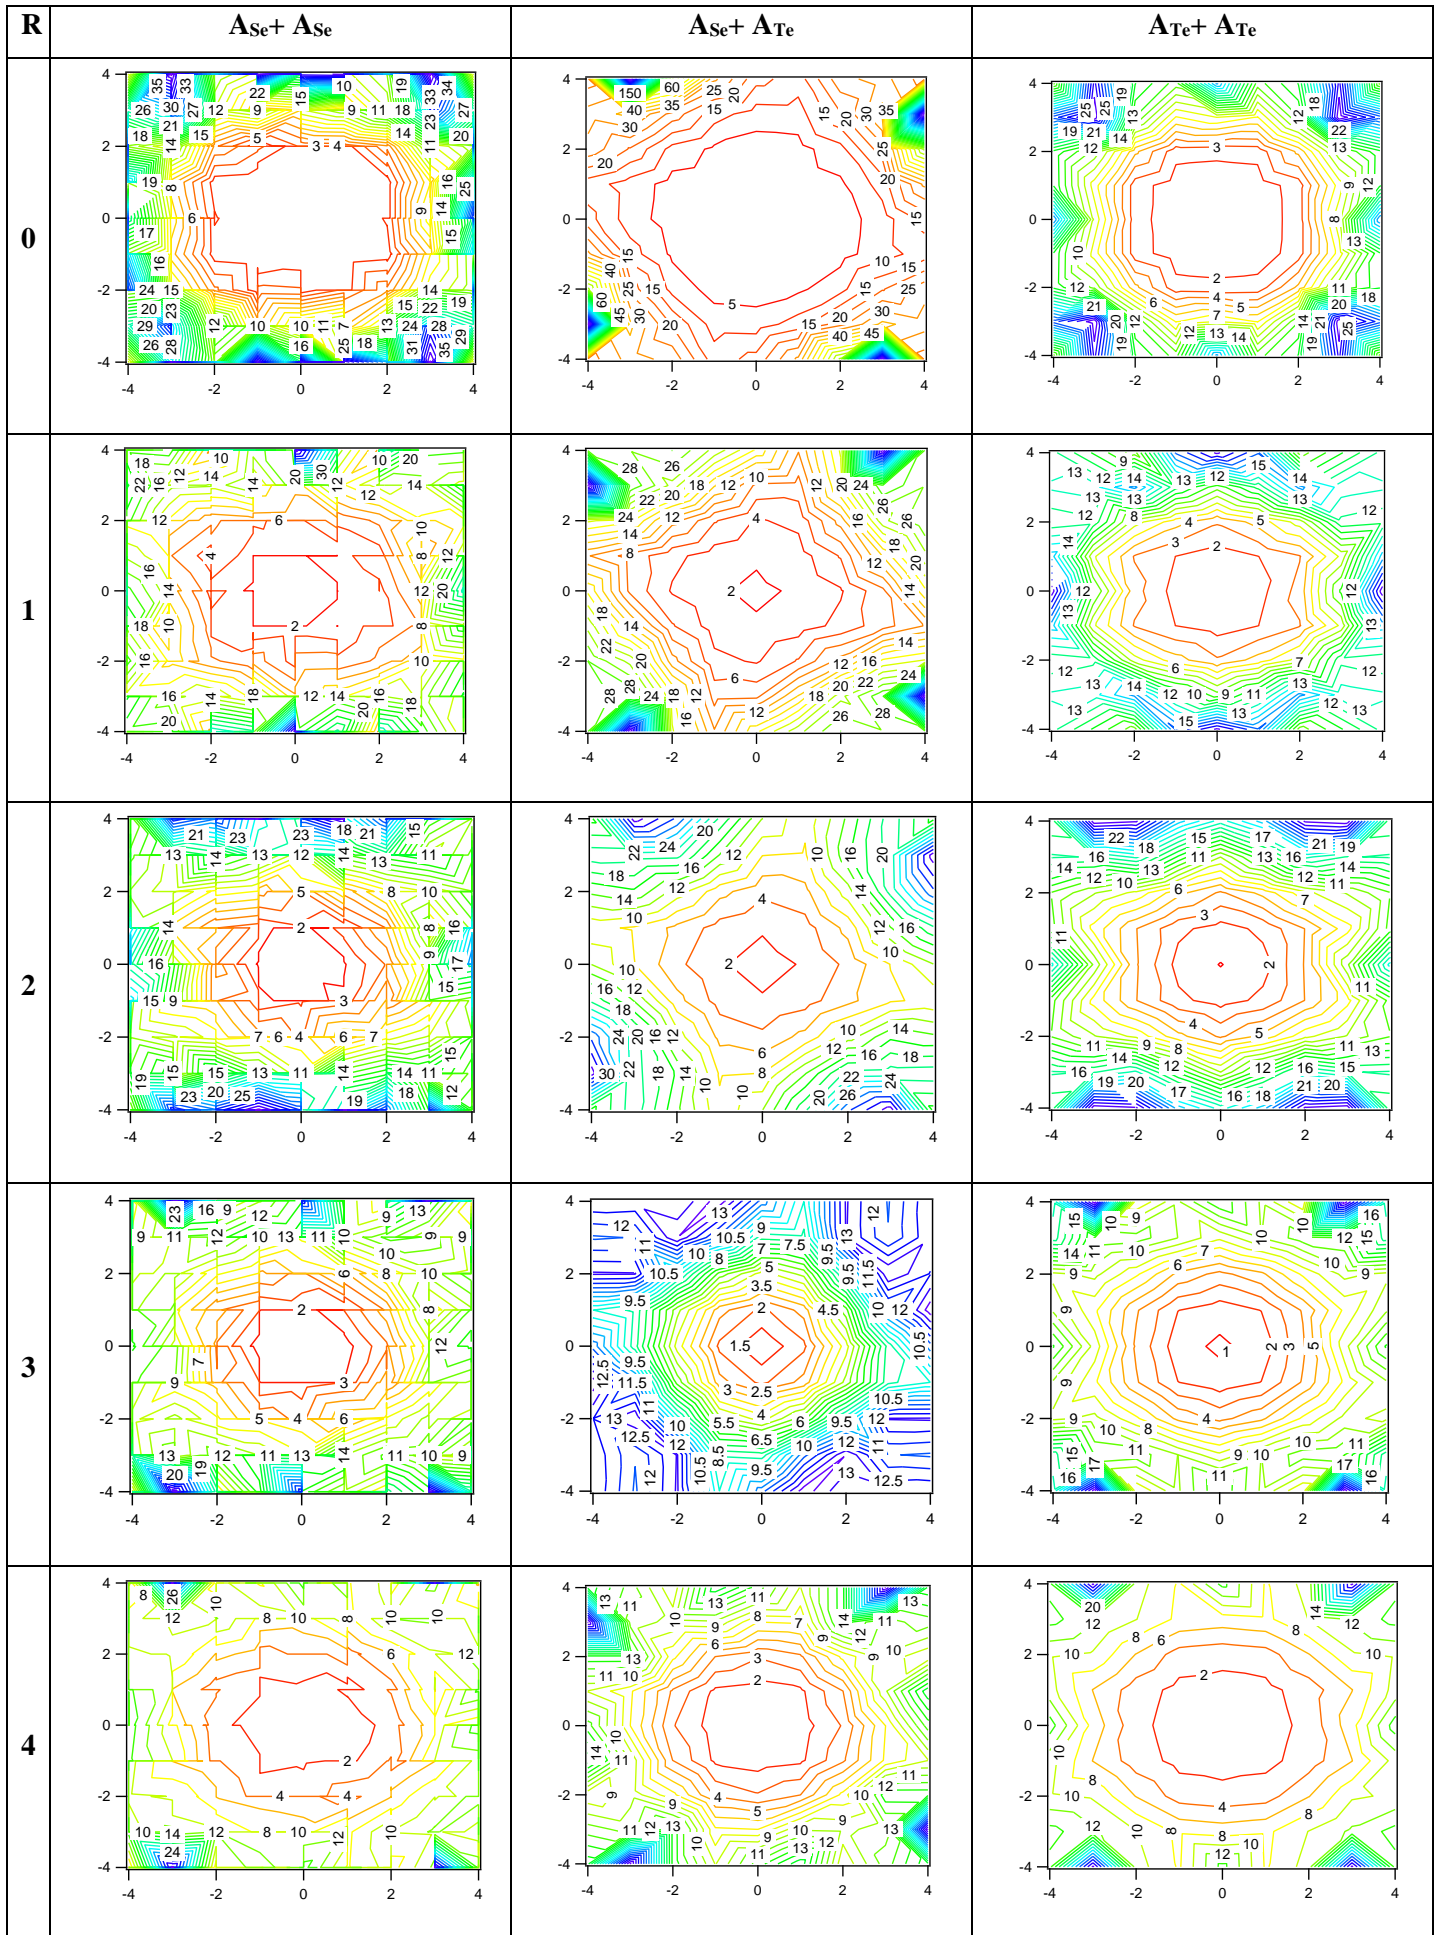

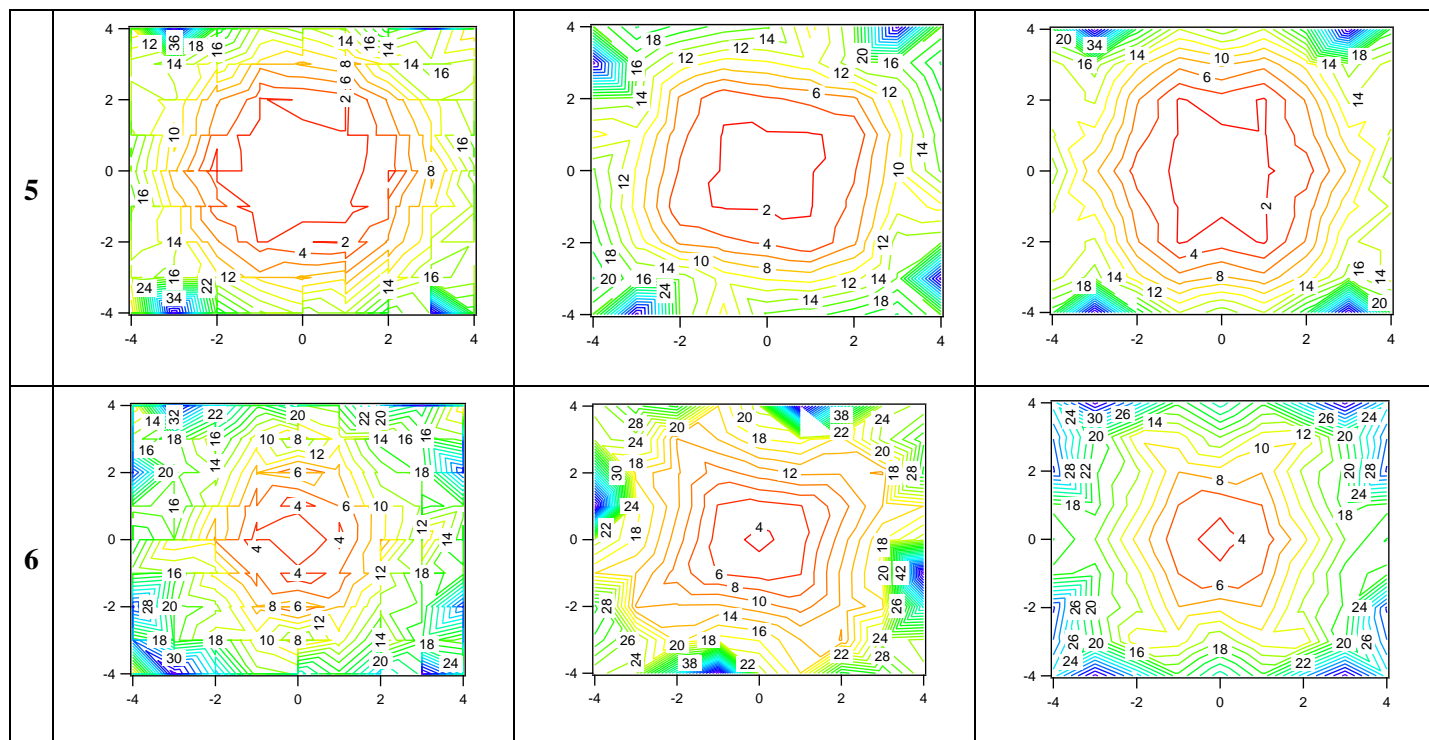

**Figure 22S.** Magnetic anisotropy of  $A_X + A_X$  complexes, where X = O, S, Se and Te. Contour on the XY plane at distances R from the center of the cage along the main Z axis of the cage

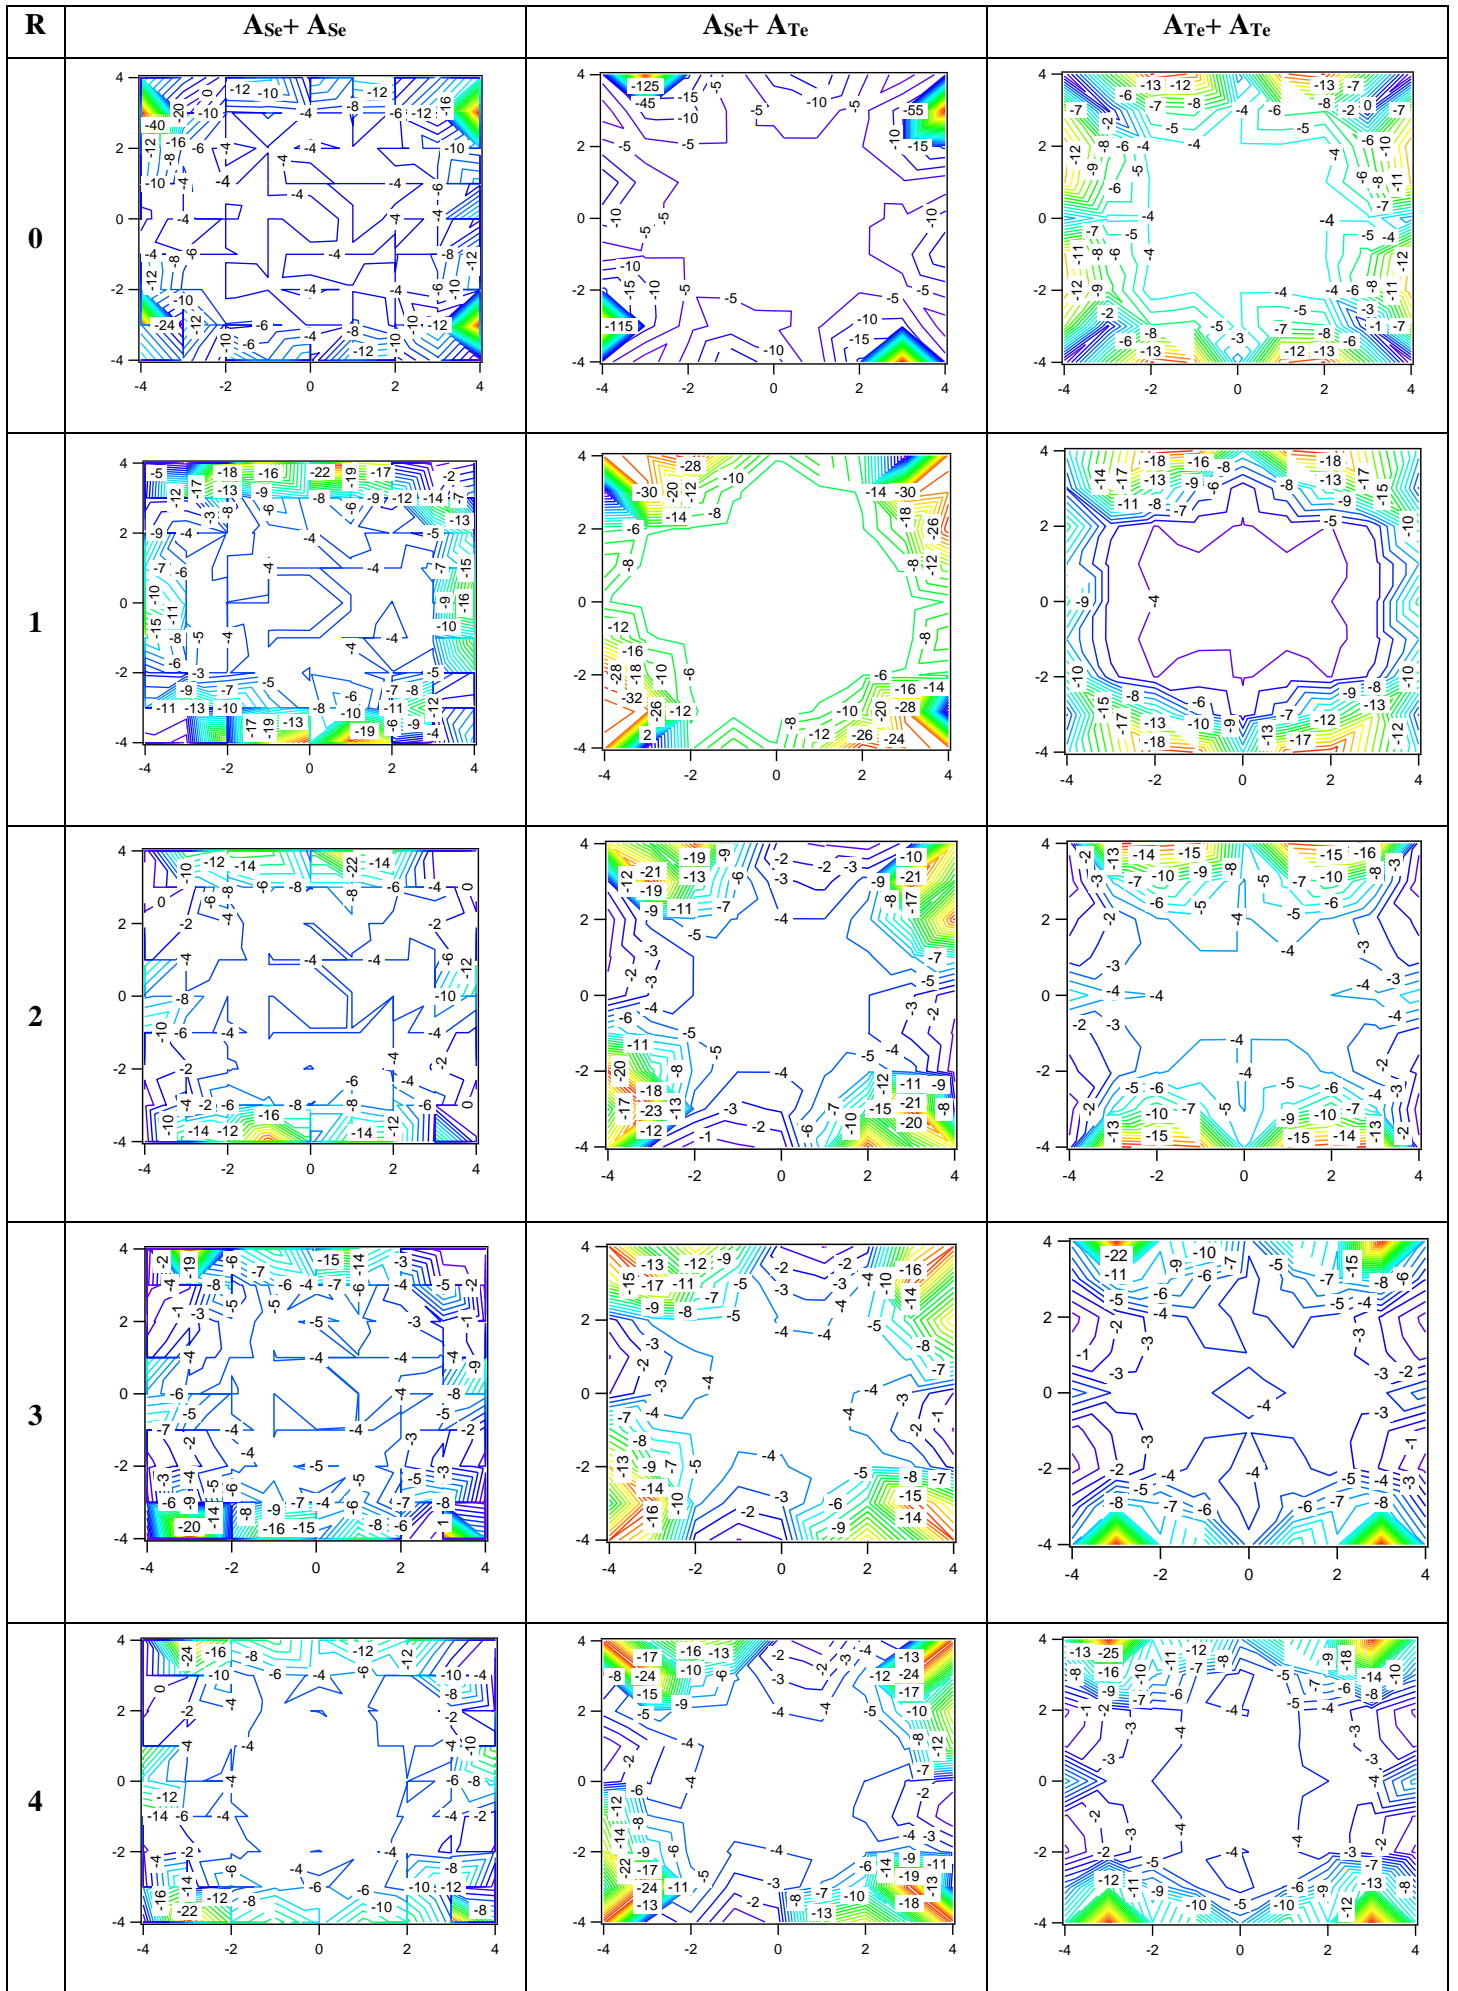



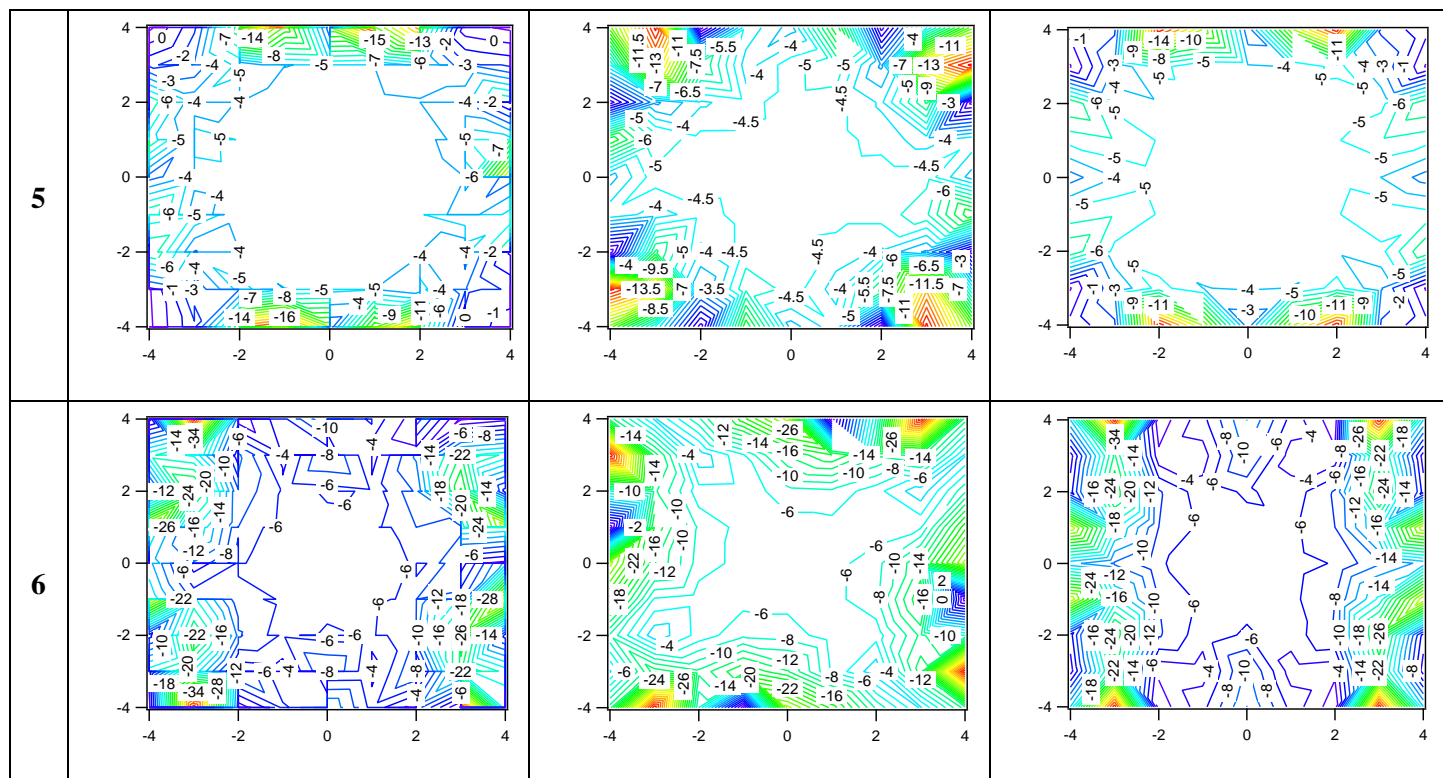

**Figure 23S.** NICS aromaticity indexes of  $A_X + A_X$  complexes, where  $X = O, S, Se$  and  $Te$ . Contour on the  $XY$  plane at distances  $R$  from the center of the cage along the main  $Z$  axis of the cage.

## Experimental Section

All analytical grade solvents and reagents purchased from commercial sources were used without further purification. SeO<sub>2</sub> was purchased from Energy Chemical Company Ltd., Shanghai China. D<sub>2</sub>O was used as NMR analysis solvents. <sup>1</sup>H and <sup>13</sup>C NMR analyses were performed using Bruker AVANCE III HD 600 MHz spectrophotometer. Positive ions high-resolution mass analyses were performed on Bruker micrOTOF II machine. Cavitand **1** was prepared using our previously reported protocol.<sup>1</sup>

### <sup>1</sup>H NMR spectra of **1** in water showing assembly with cyclic ketone

#### *General procedure for the binding analyses*

1 mM, 0.5 mL of **1** in D<sub>2</sub>O was taken in NMR tube and excess pure cyclic ketone (~0.5 μL or ~0.5 mg) was added to the tube, it was shaken well to mix the guest in water. The sample was sonicated for 1 h at rt and analyzed by <sup>1</sup>H NMR spectroscopy at rt.

### <sup>1</sup>H NMR spectra of **1** in water in the presence of different alkyl halides

#### *General procedure for the binding analyses*

1 mM, 0.5 mL of **1** in D<sub>2</sub>O was taken in NMR tube and excess pure alkyl halide (~0.5 μL or ~0.5 mg) was added to the tube, it was shaken well to mix the guest in water. The sample was sonicated for 1 h at rt and analyzed by <sup>1</sup>H NMR spectroscopy at rt.

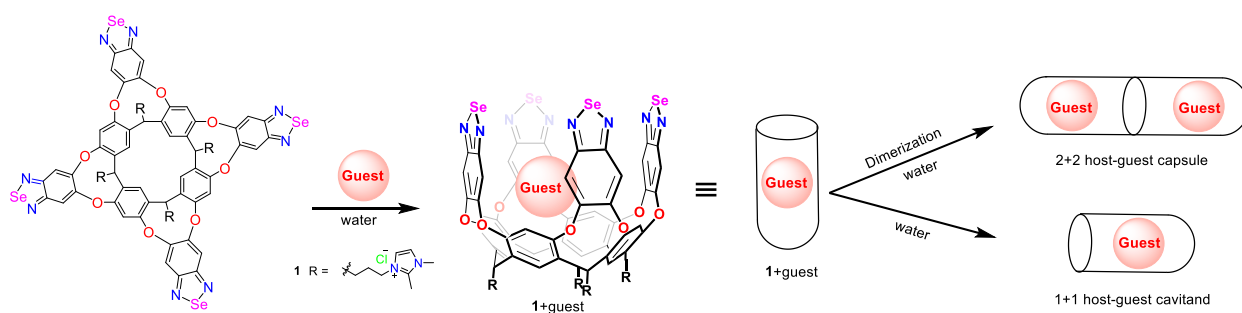

**Fig. 24S** Cartoons of 1 + 1 Host–Guest Cavitand and 2 + 2 and 2 + 1 Host–Guest Capsules

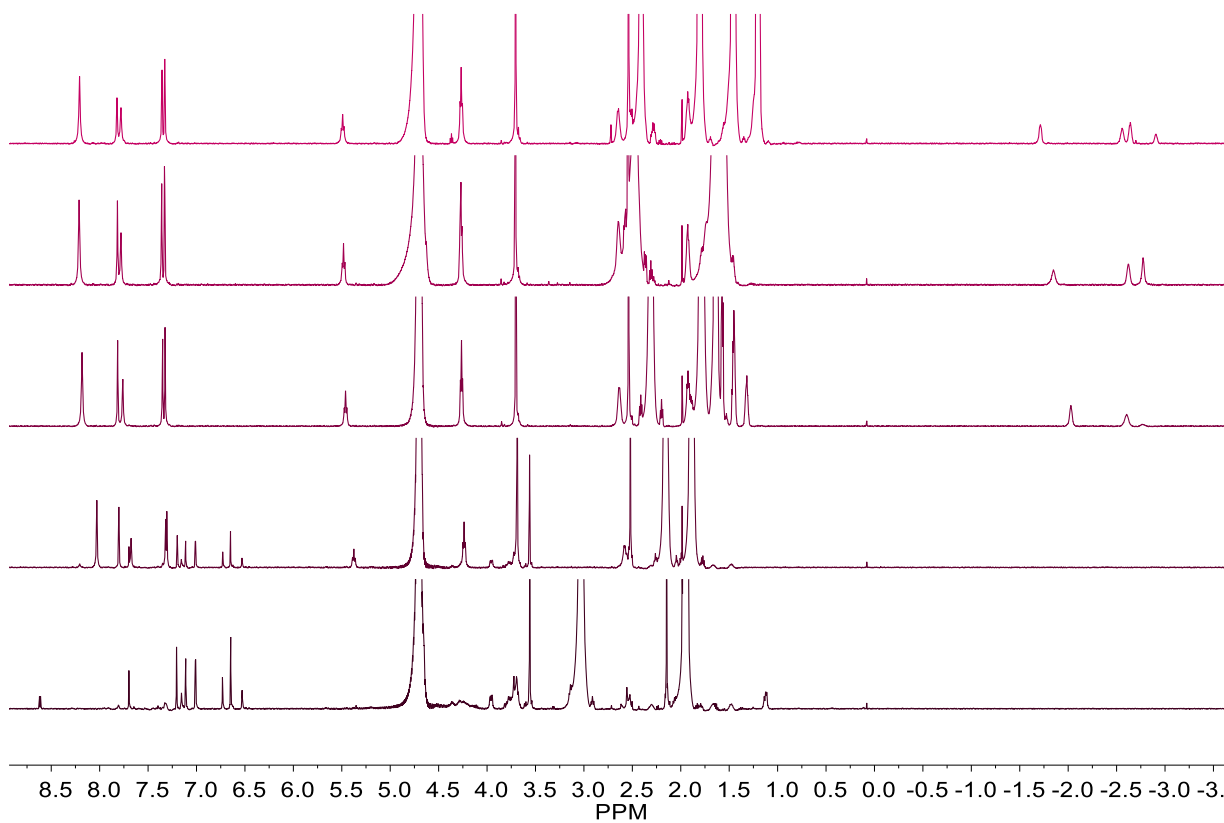

**Fig. 25S**  $^1\text{H}$  NMR spectrum of the complex formed between **1** + cycloketone in  $\text{D}_2\text{O}$  (600 MHz, rt) from bottom to top, cyclobutanone, cyclopentanone, cyclohexanone, cycloheptanone, cyclooctenone

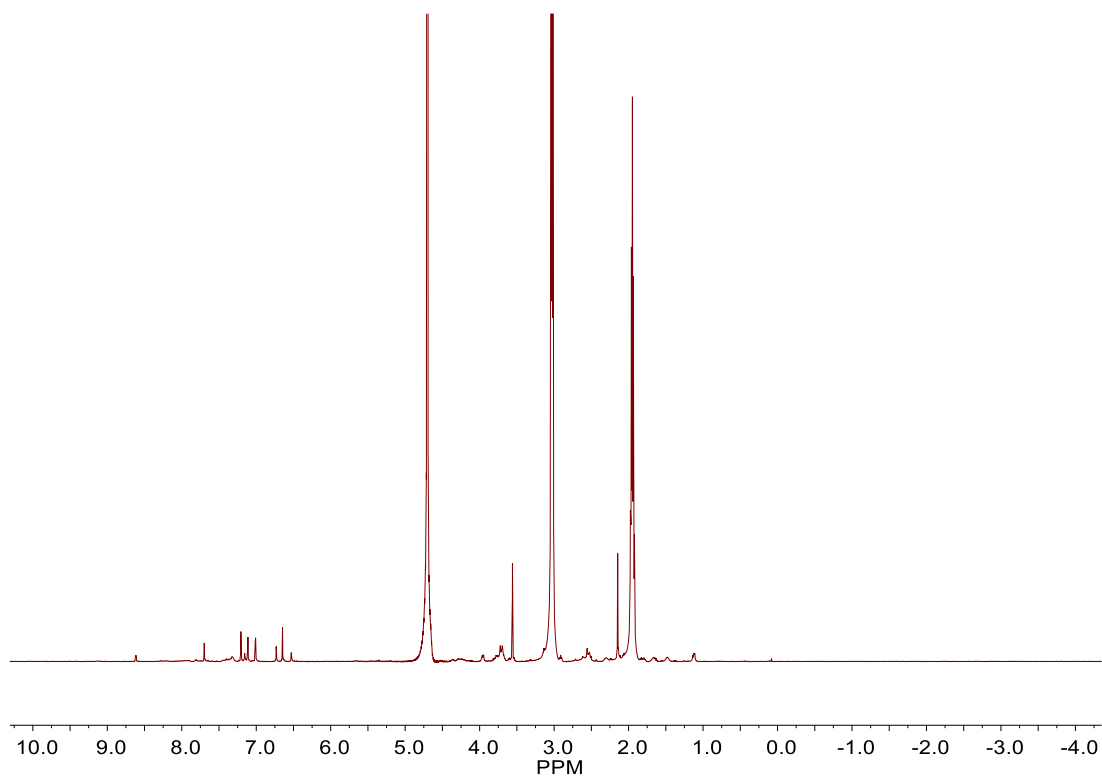

**Fig. 26S**  $^1\text{H}$  NMR spectrum of the complex formed between **1** + cyclobutanone in  $\text{D}_2\text{O}$  (600 MHz, rt)

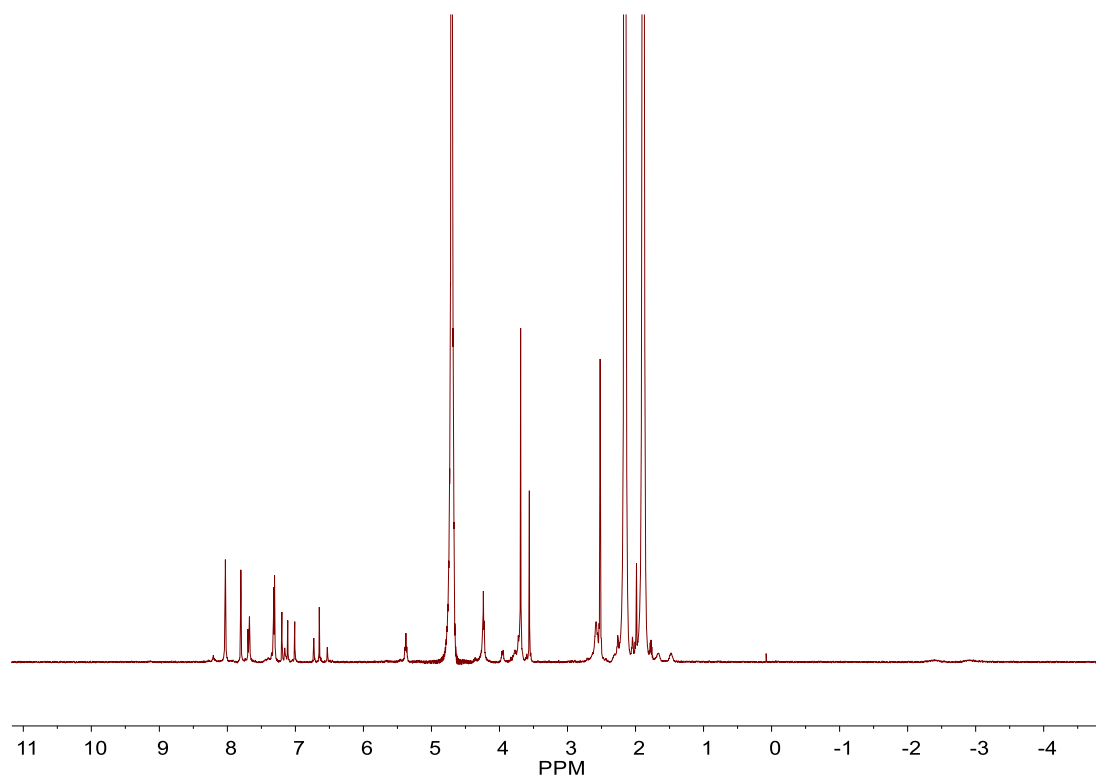

**Fig. 27S**  $^1\text{H}$  NMR spectrum of the complex formed between **1** + cyclopentanone in  $\text{D}_2\text{O}$  (600 MHz, rt)

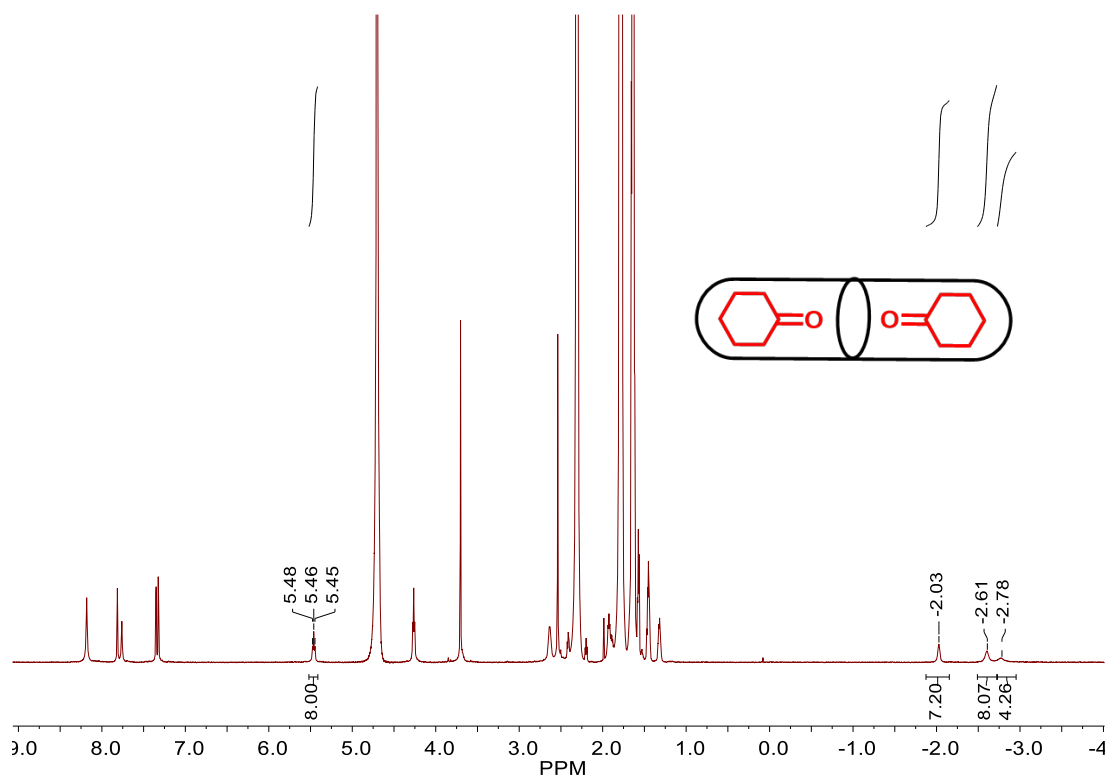

**Fig. 28S**  $^1\text{H}$  NMR spectrum of the complex formed between **1** + cyclohexanone in  $\text{D}_2\text{O}$  (600 MHz, rt)

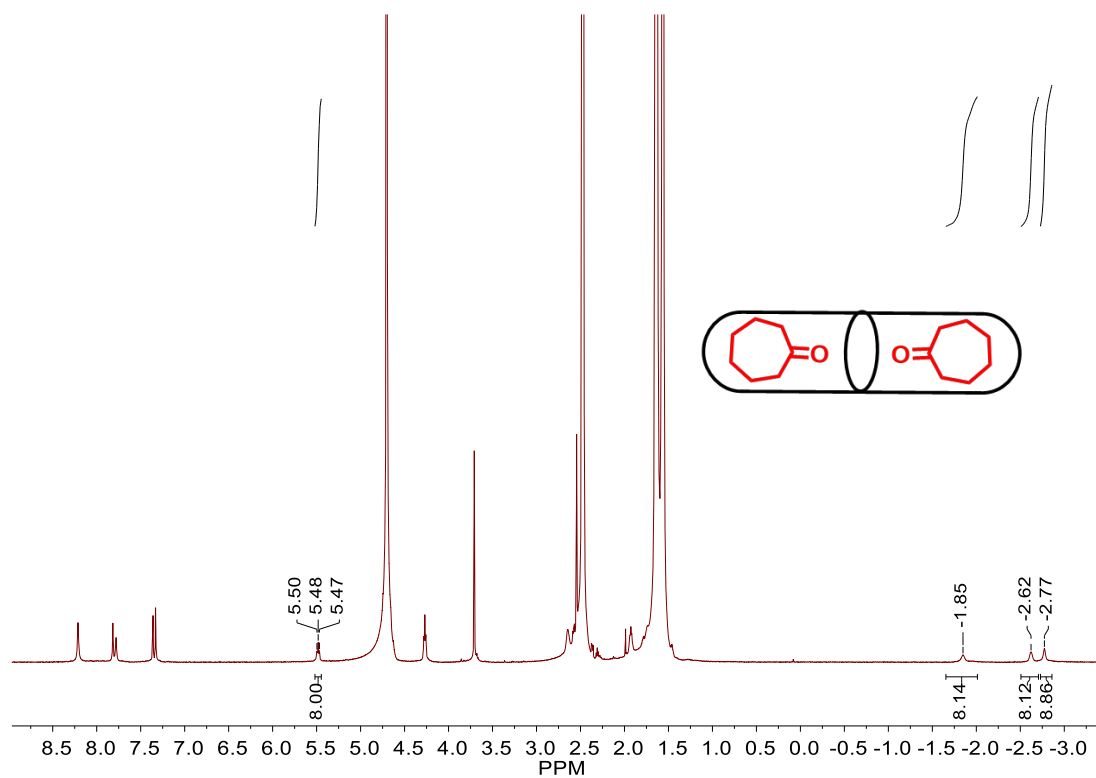

**Fig. 29S**  $^1\text{H}$  NMR spectrum of the complex formed between **1** + cycloheptanone in  $\text{D}_2\text{O}$  (600 MHz, rt)

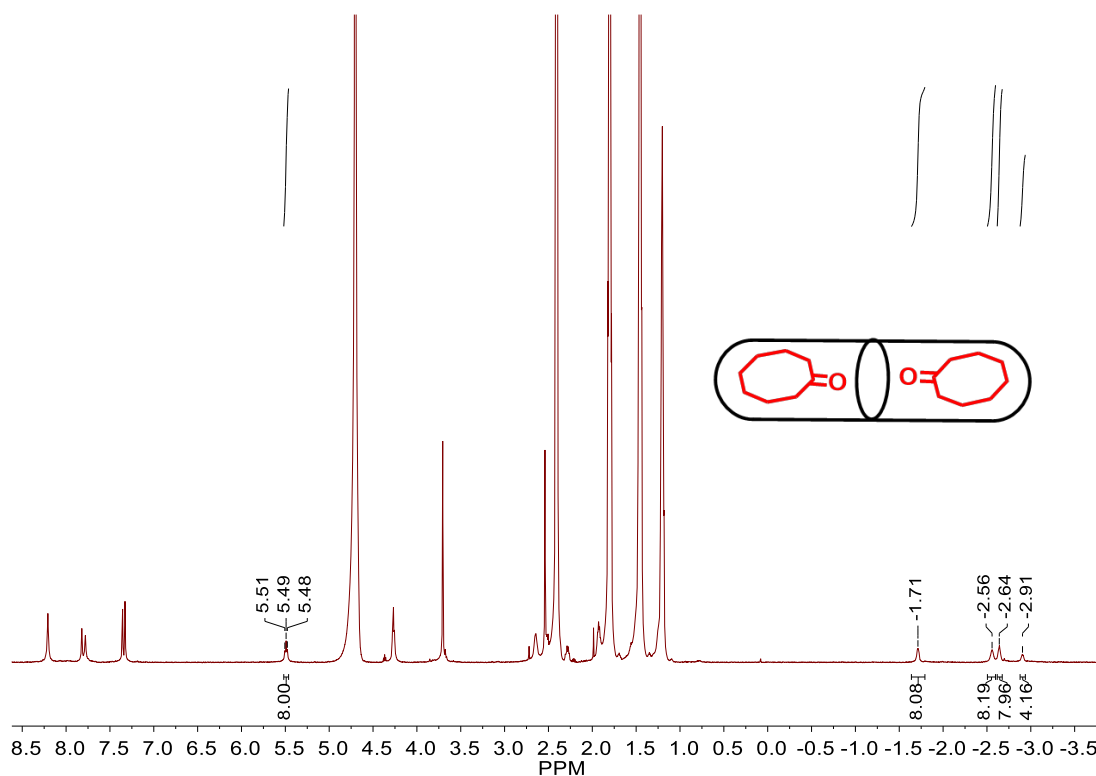

**Fig. 30S**  $^1\text{H}$  NMR spectrum of the complex formed between **1** + cyclooctanone in  $\text{D}_2\text{O}$  (600 MHz, rt)

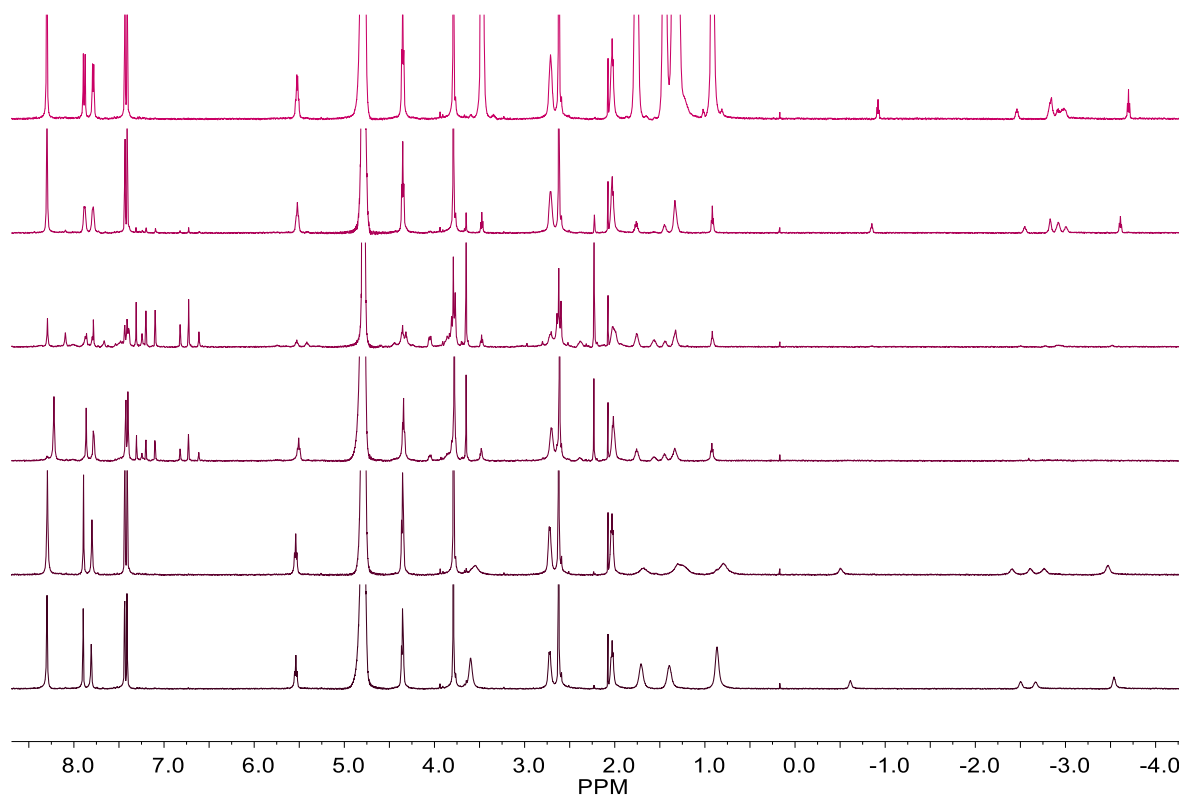

**Fig. 31S**  $^1\text{H}$  NMR spectrum of the complex formed between **1** + 1-chloroalkane in  $\text{D}_2\text{O}$  (600 MHz, rt) from bottom to top, 1-chlorobutane, 1-chloropentane, 1-chlorohexane, 1-chloroheptane, 1-chlorooctane, 1-chlorononane

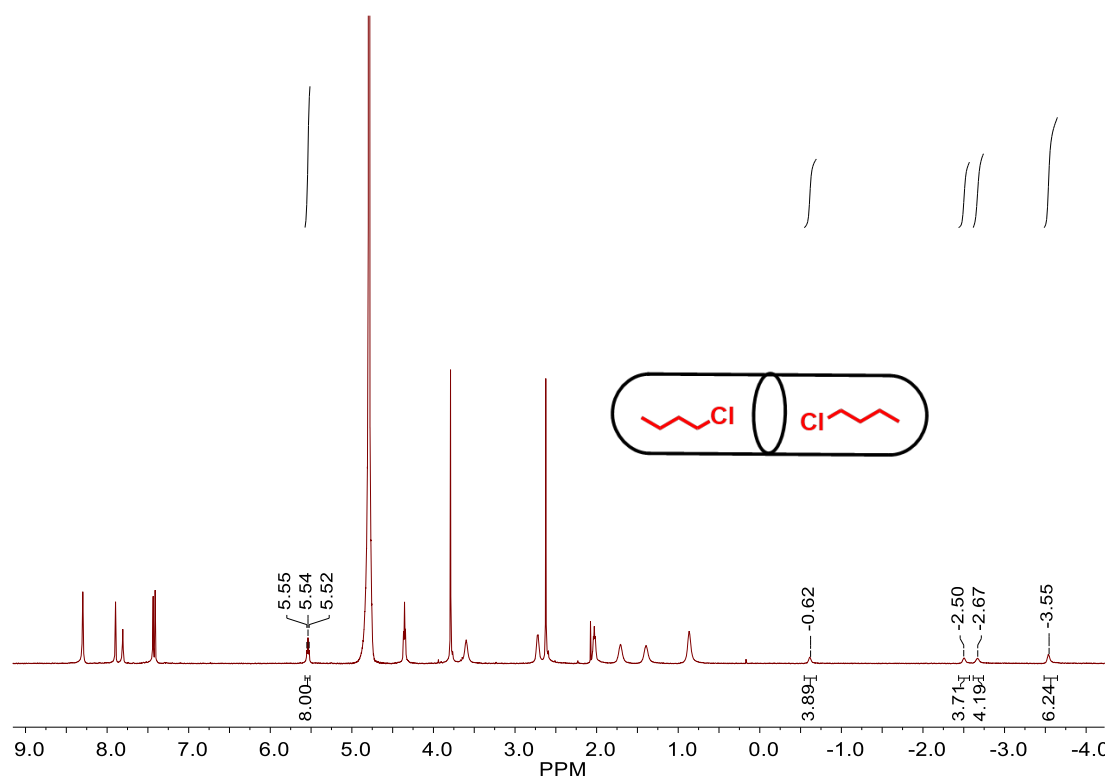

**Fig. 32S**  $^1\text{H}$  NMR spectrum of the complex formed between **1** + 1-chlorobutane in  $\text{D}_2\text{O}$  (600 MHz, rt)

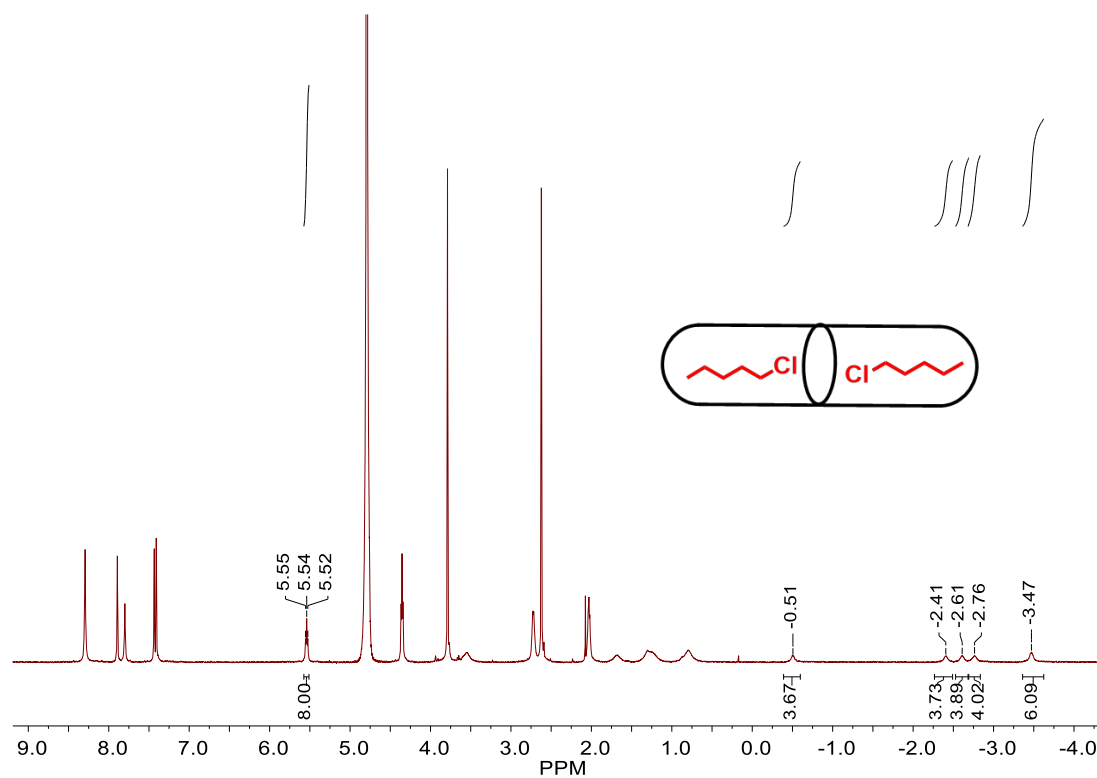

**Fig. 33S**  $^1\text{H}$  NMR spectrum of the complex formed between **1** + 1-chloropentane in  $\text{D}_2\text{O}$  (600 MHz, rt)

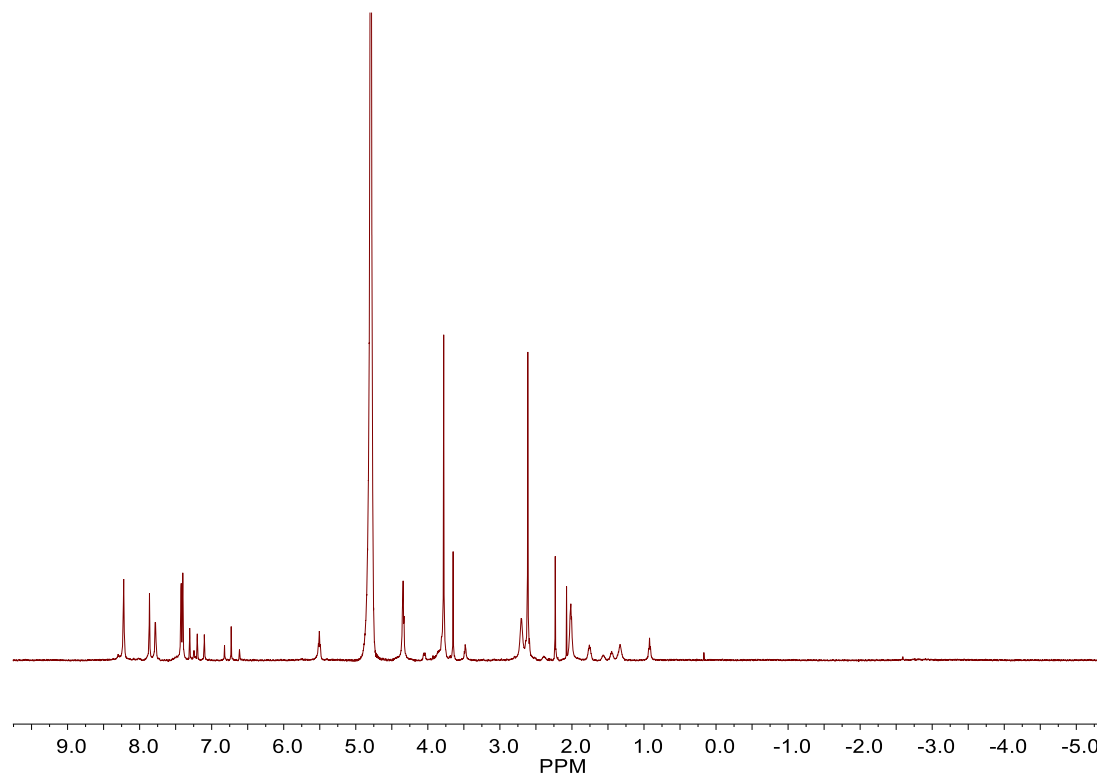

**Fig. 14S**  $^1\text{H}$  NMR spectrum of the complex formed between **1** + 1-chlorohexane in  $\text{D}_2\text{O}$  (600 MHz, rt)

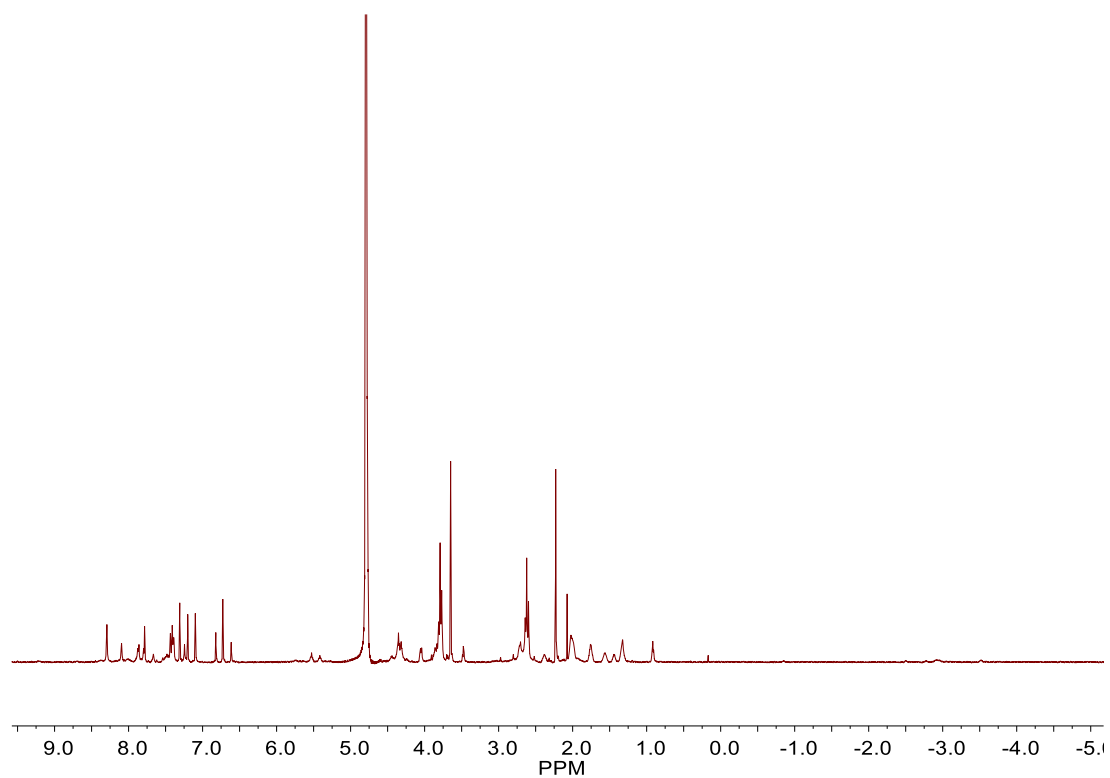

**Fig. 35S**  $^1\text{H}$  NMR spectrum of the complex formed between **1** + 1-chloroheptane in  $\text{D}_2\text{O}$  (600 MHz, rt)

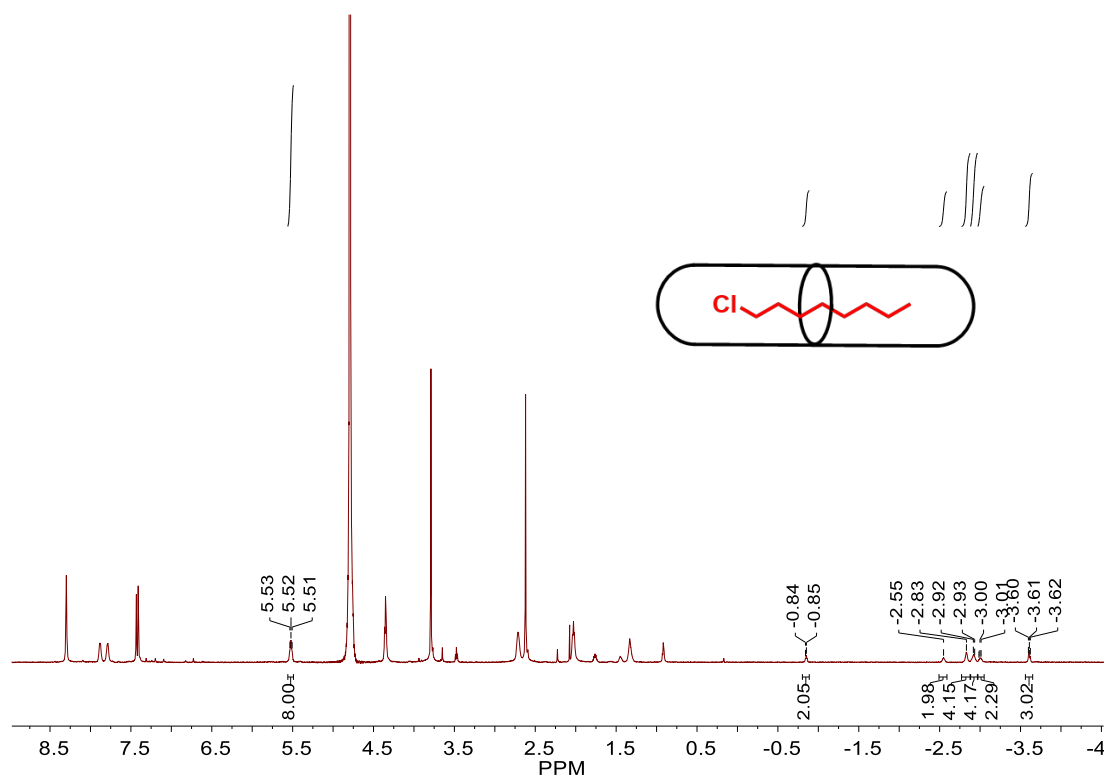

**Fig. 362S**  $^1\text{H}$  NMR spectrum of the complex formed between **1** + 1-chlorooctane in  $\text{D}_2\text{O}$  (600 MHz, rt)



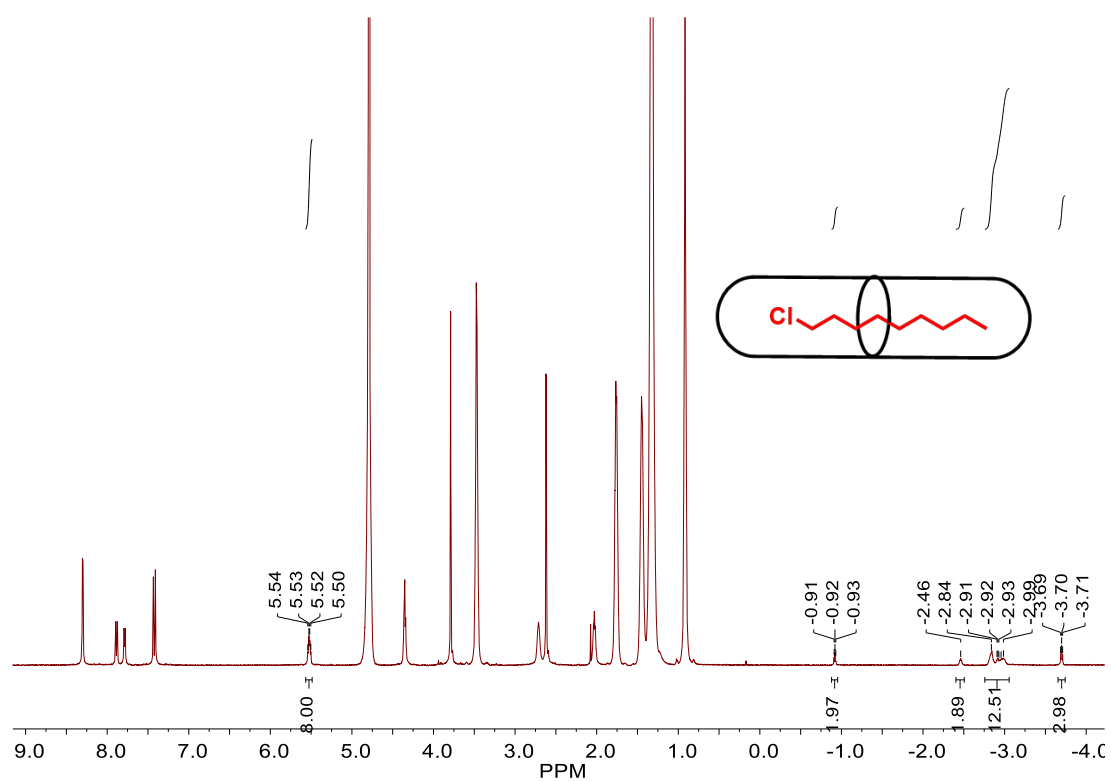

**Fig. 37S**  $^1\text{H}$  NMR spectrum of the complex formed between **1** + 1-chlorononane in  $\text{D}_2\text{O}$  (600 MHz, rt)

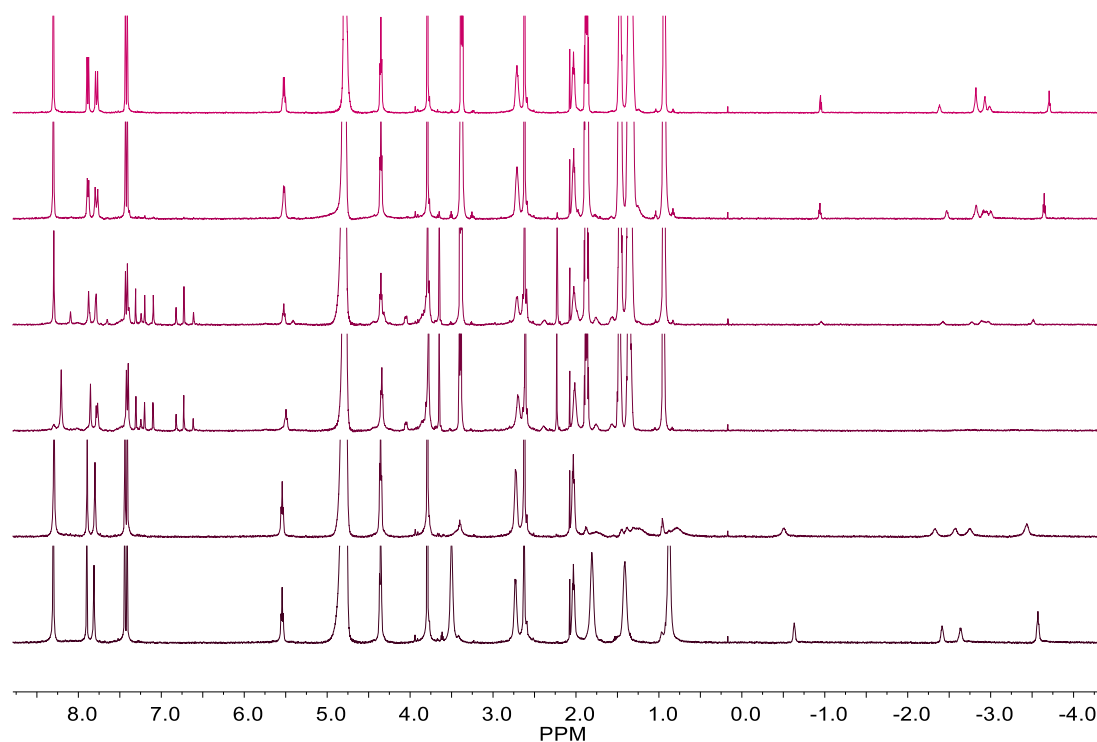

**Fig. 38S**  $^1\text{H}$  NMR spectrum of the complex formed between **1** + 1-bromoalkane in  $\text{D}_2\text{O}$  (600 MHz, rt) from bottom to top, 1-bromobutane, 1-bromopentane, 1-bromohexane, 1-bromoheptane, 1-bromooctane, 1-bromononane

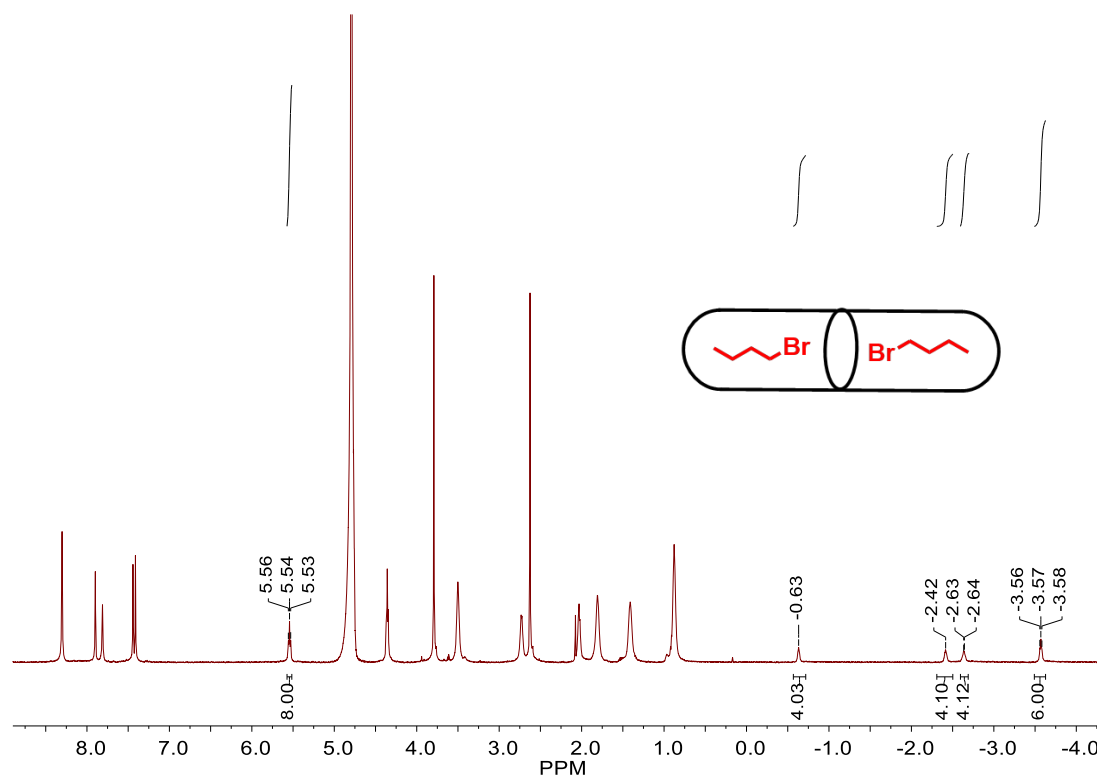

**Fig. 39S**  $^1\text{H}$  NMR spectrum of the complex formed between **1** + 1-bromobutane in  $\text{D}_2\text{O}$  (600 MHz, rt)

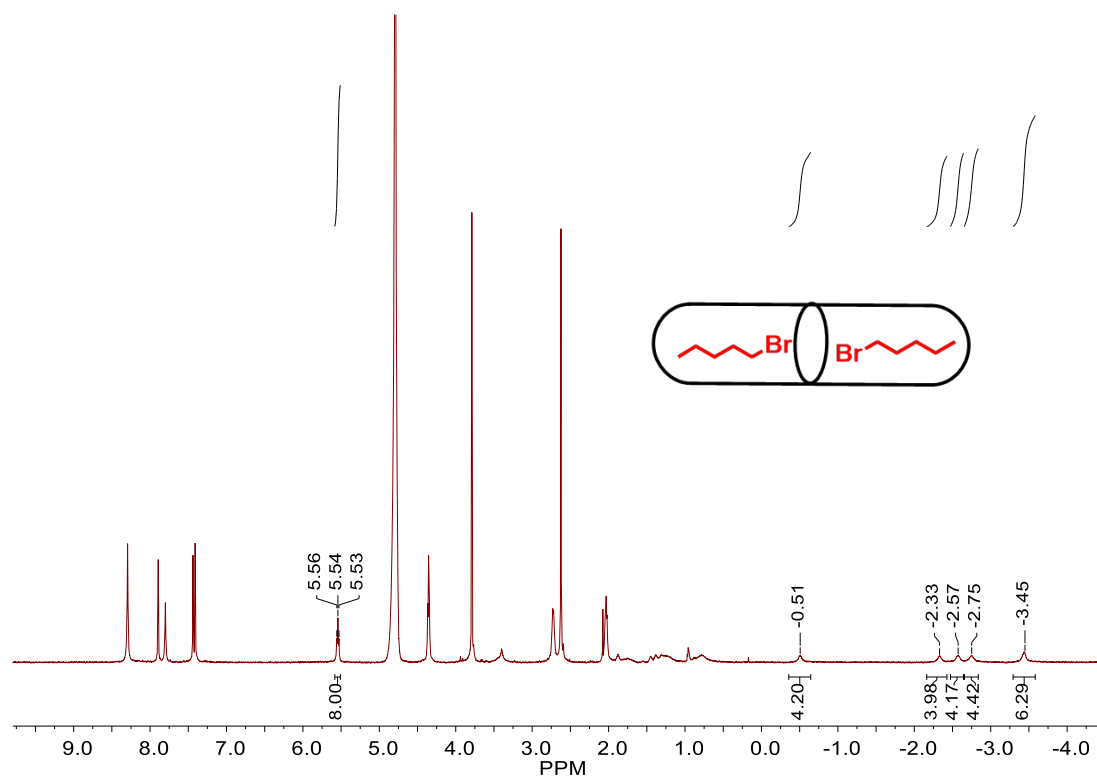

**Fig. 40S**  $^1\text{H}$  NMR spectrum of the complex formed between **1** + 1-bromopentane in  $\text{D}_2\text{O}$  (600 MHz, rt)

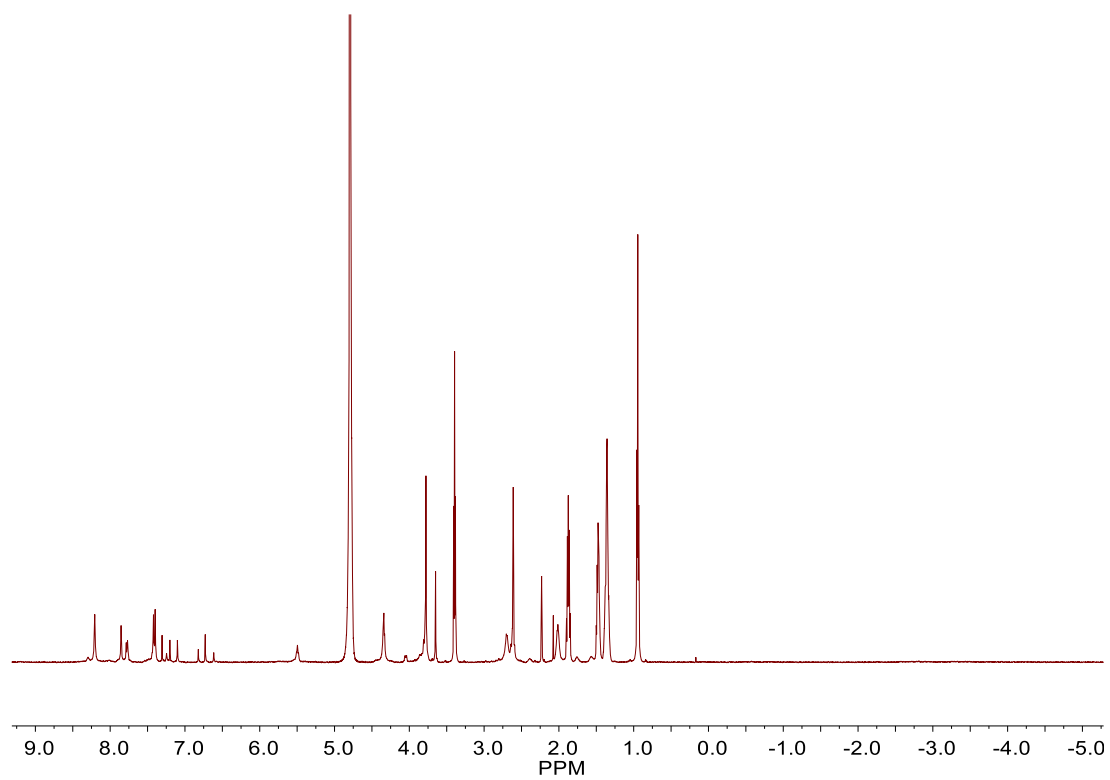

**Fig. 41S**  $^1\text{H}$  NMR spectrum of the complex formed between **1** + 1-bromohexane in  $\text{D}_2\text{O}$  (600 MHz, rt)

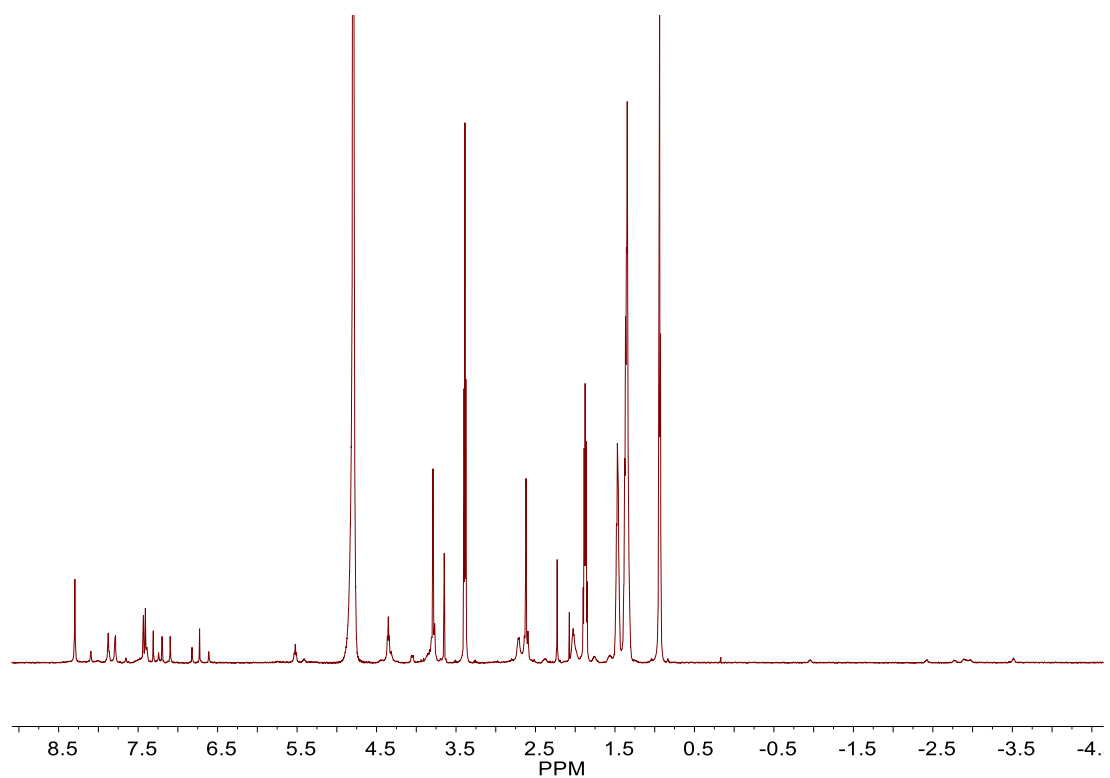

**Fig. 42S**  $^1\text{H}$  NMR spectrum of the complex formed between **1** + 1-bromoheptane in  $\text{D}_2\text{O}$  (600 MHz, rt)

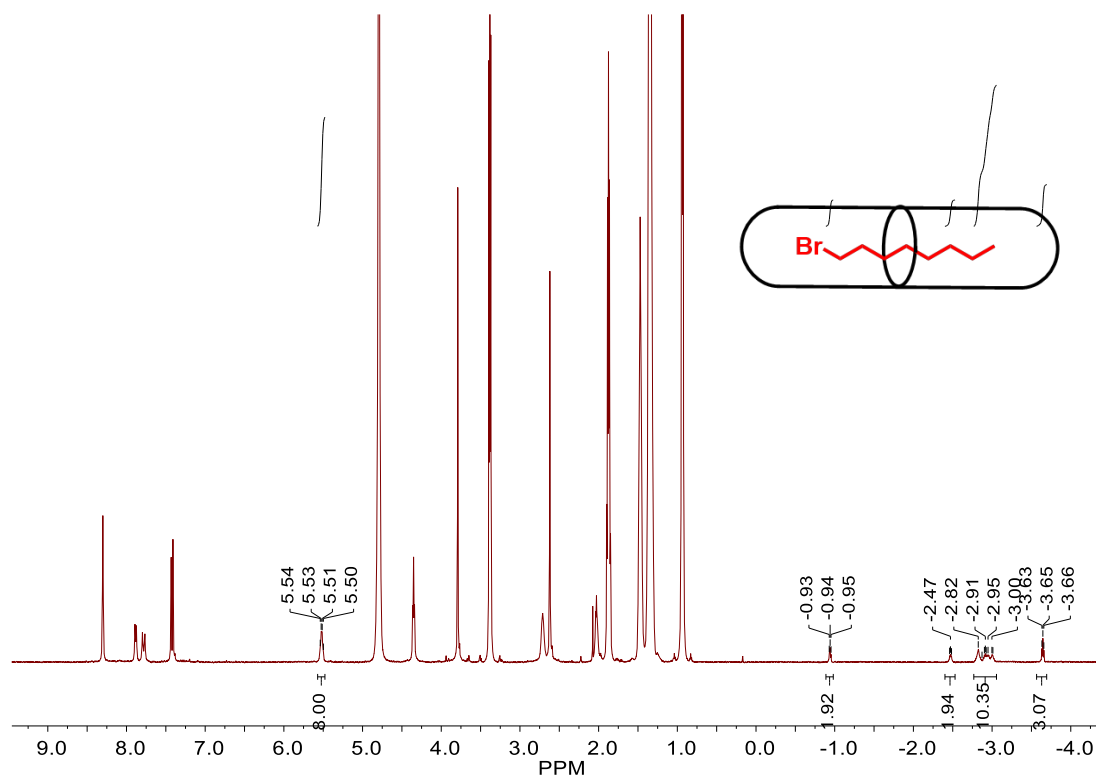

**Fig. 43S**  $^1\text{H}$  NMR spectrum of the complex formed between **1** + 1-bromooctane in  $\text{D}_2\text{O}$  (600 MHz, rt)

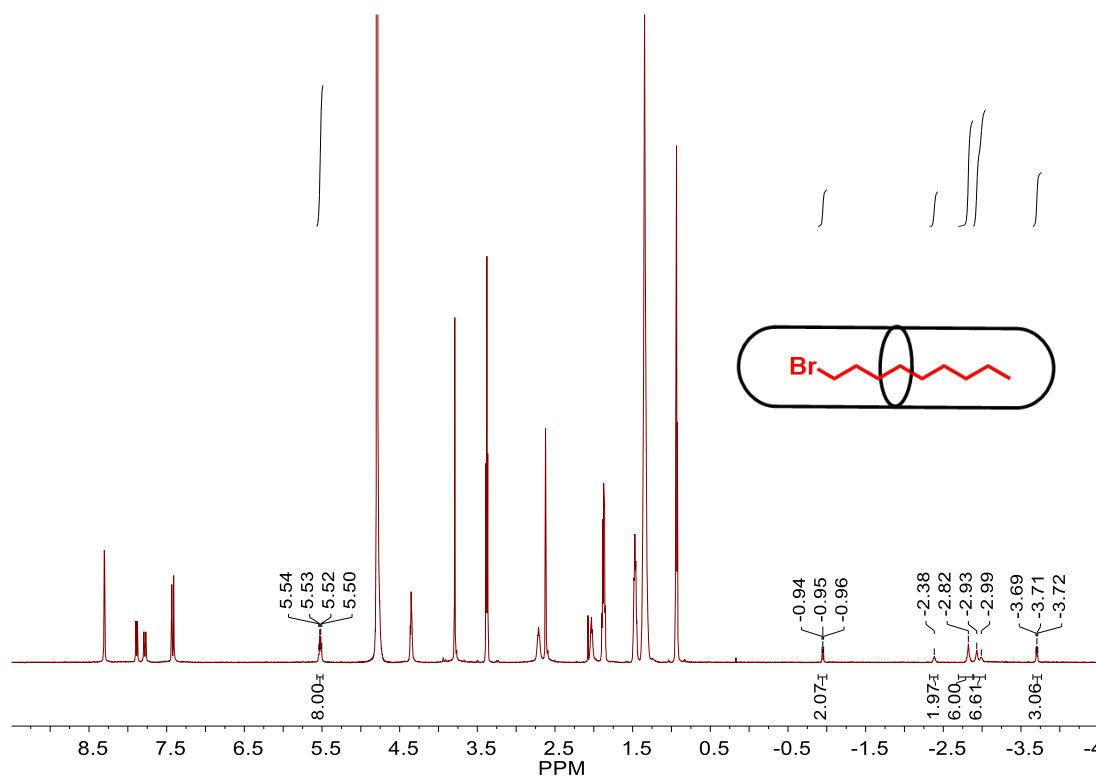

**Fig. 44S**  $^1\text{H}$  NMR spectrum of the complex formed between **1** + 1-bromononane in  $\text{D}_2\text{O}$  (600 MHz, rt)

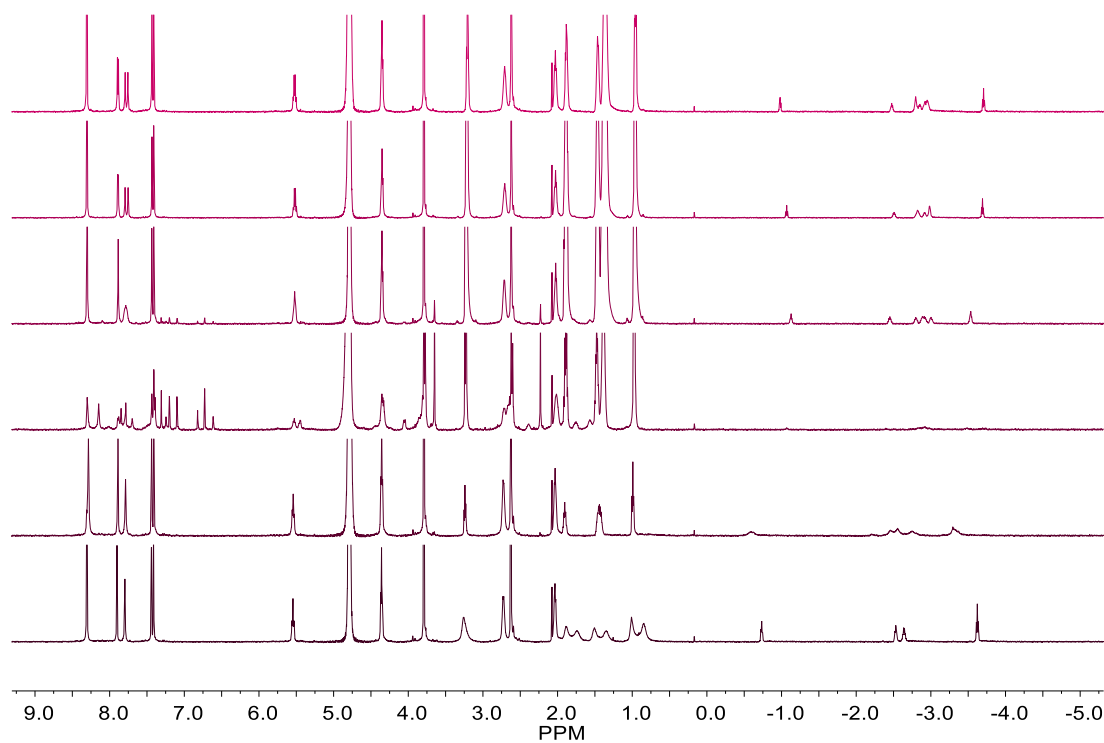

**Fig. 45S**  $^1\text{H}$  NMR spectrum of the complex formed between **1** + 1-iodoalkane in  $\text{D}_2\text{O}$  (600 MHz, rt) from bottom to top, 1-iodobutane, 1-iodopentane, 1-iodohexane, 1-iodoheptane, 1-iodooctane, 1-iodononane

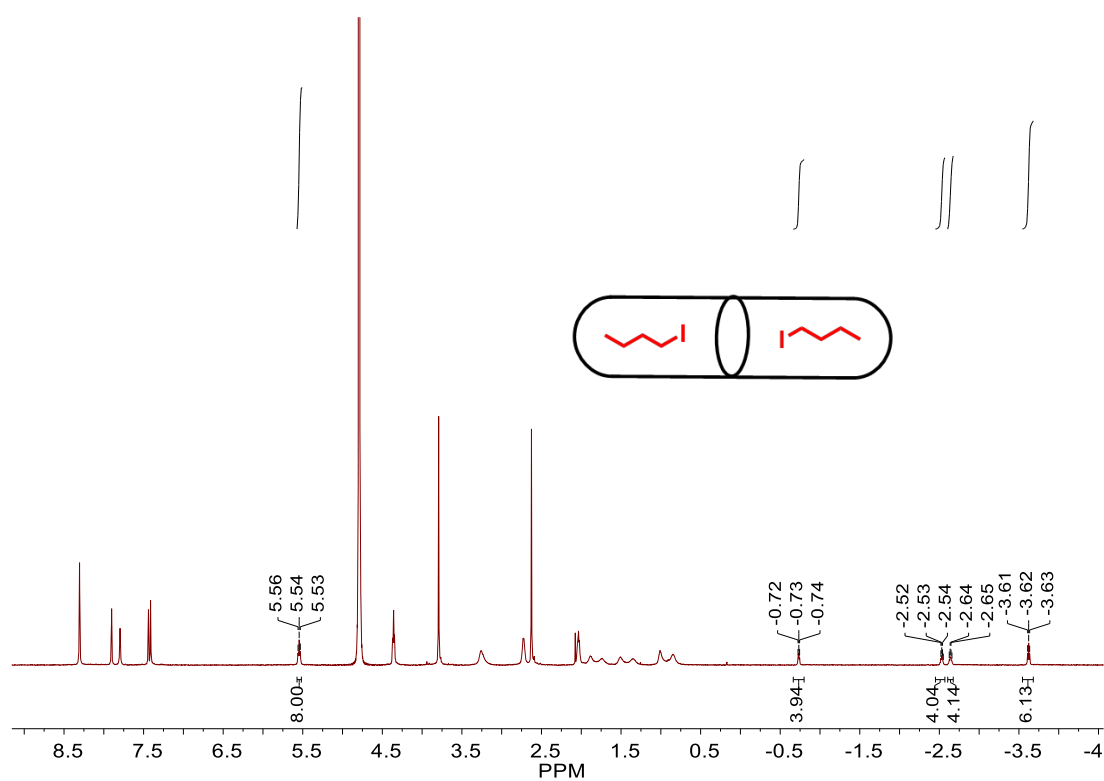

**Fig. 46S**  $^1\text{H}$  NMR spectrum of the complex formed between **1** + 1-iodobutane in  $\text{D}_2\text{O}$  (600 MHz, rt)

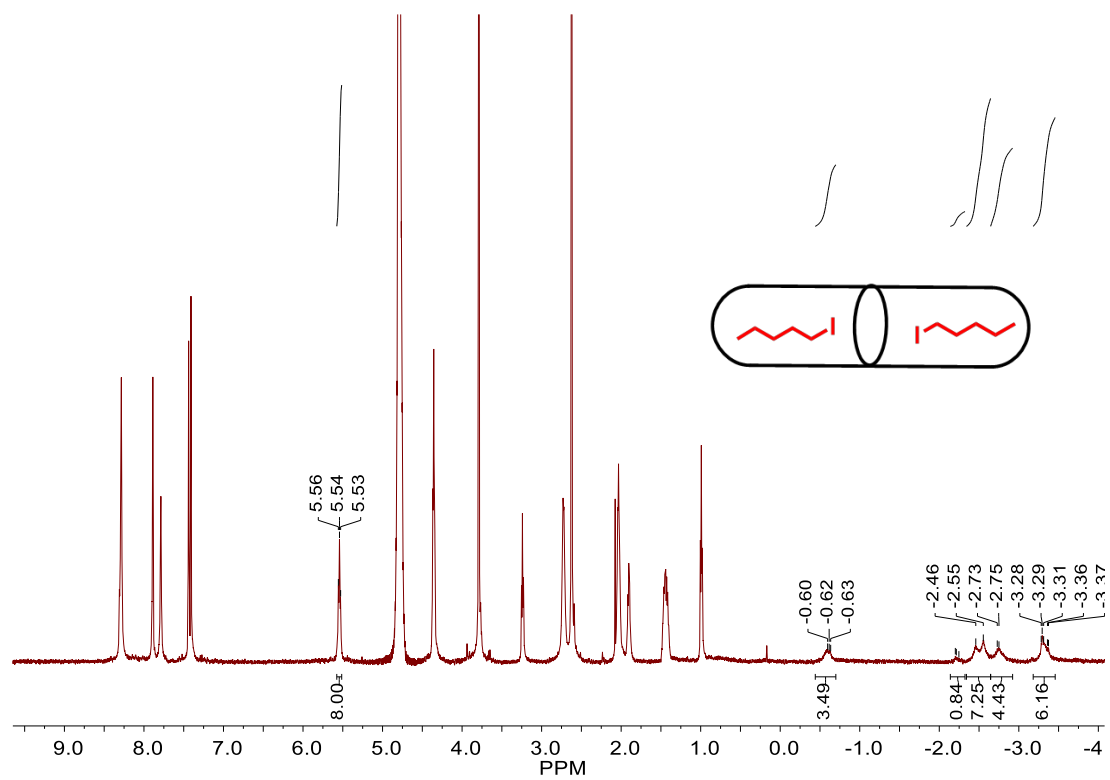

**Fig. 47S**  $^1\text{H}$  NMR spectrum of the complex formed between **1** + 1-iodopentane in  $\text{D}_2\text{O}$  (600 MHz, rt)

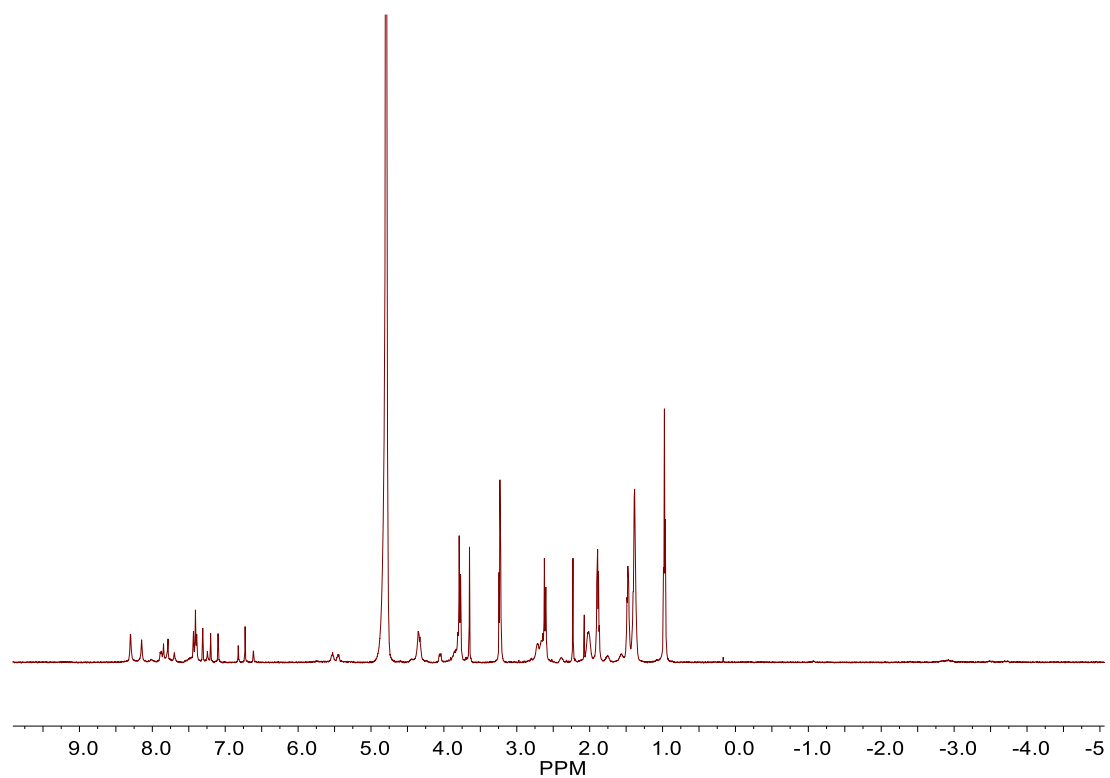

**Fig. 48S**  $^1\text{H}$  NMR spectrum of the complex formed between **1** + 1-iodohexane in  $\text{D}_2\text{O}$  (600 MHz, rt)

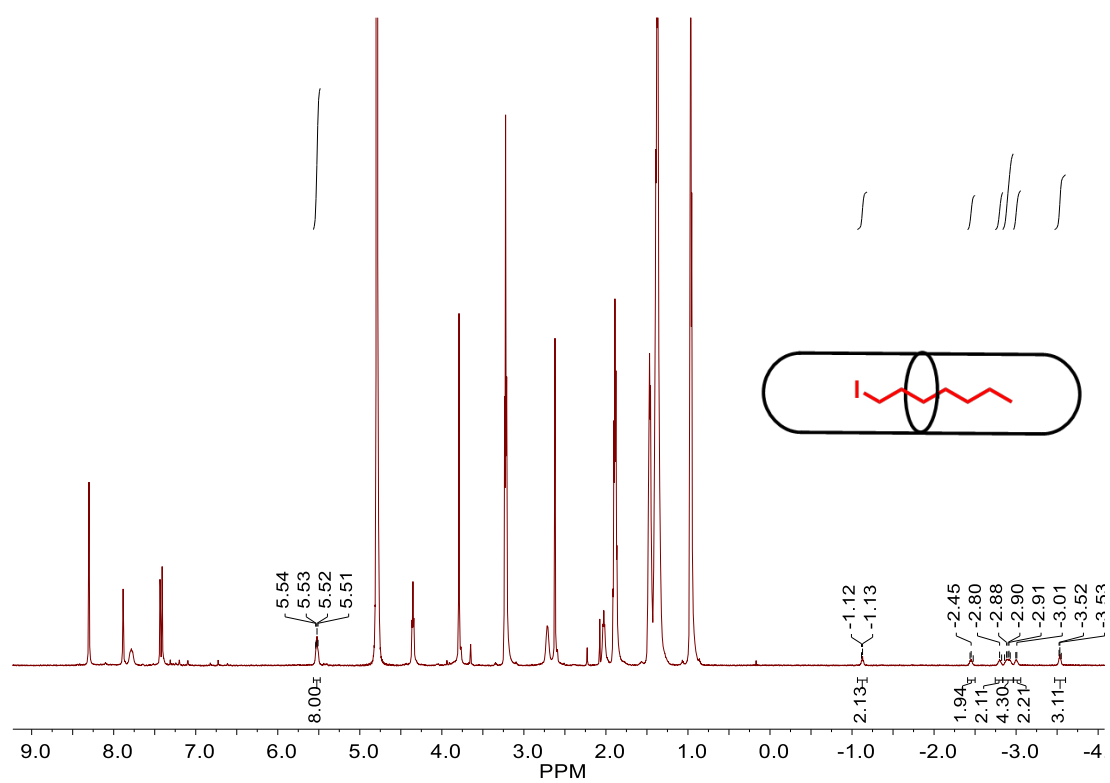

**Fig. 49S**  $^1\text{H}$  NMR spectrum of the complex formed between **1** + 1-iodoheptane in  $\text{D}_2\text{O}$  (600 MHz, rt)

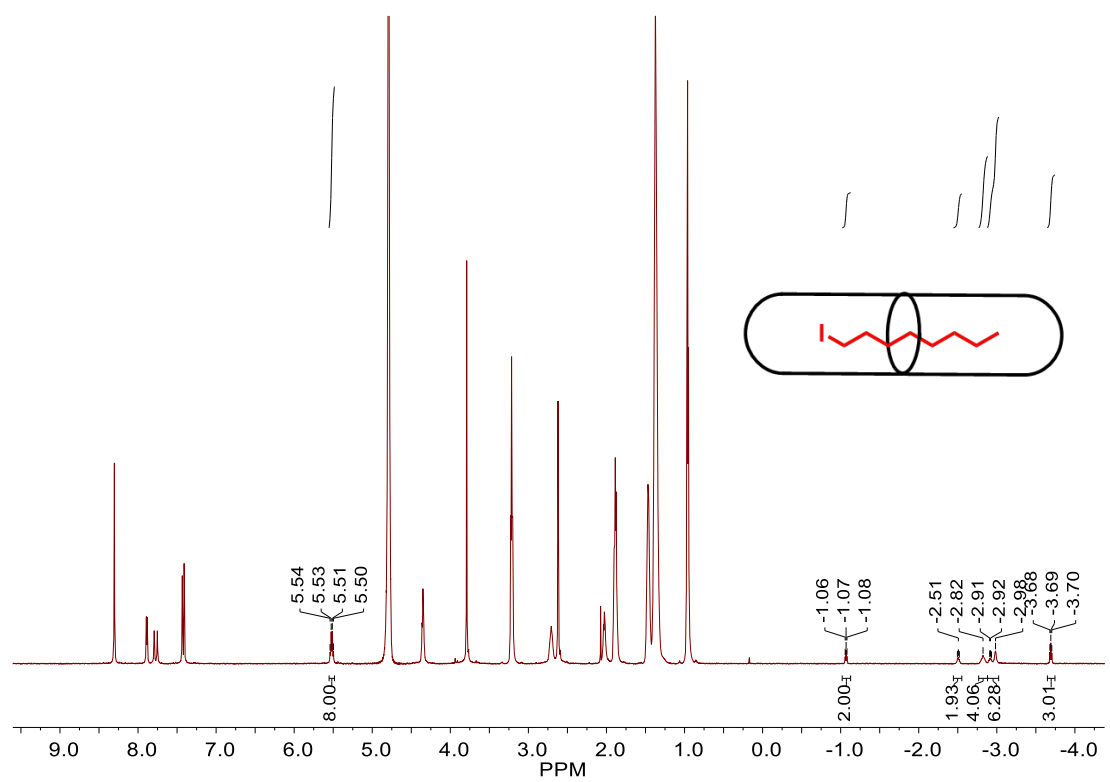

**Fig. 50S**  $^1\text{H}$  NMR spectrum of the complex formed between **1** + 1-iodooctane in  $\text{D}_2\text{O}$  (600 MHz, rt)

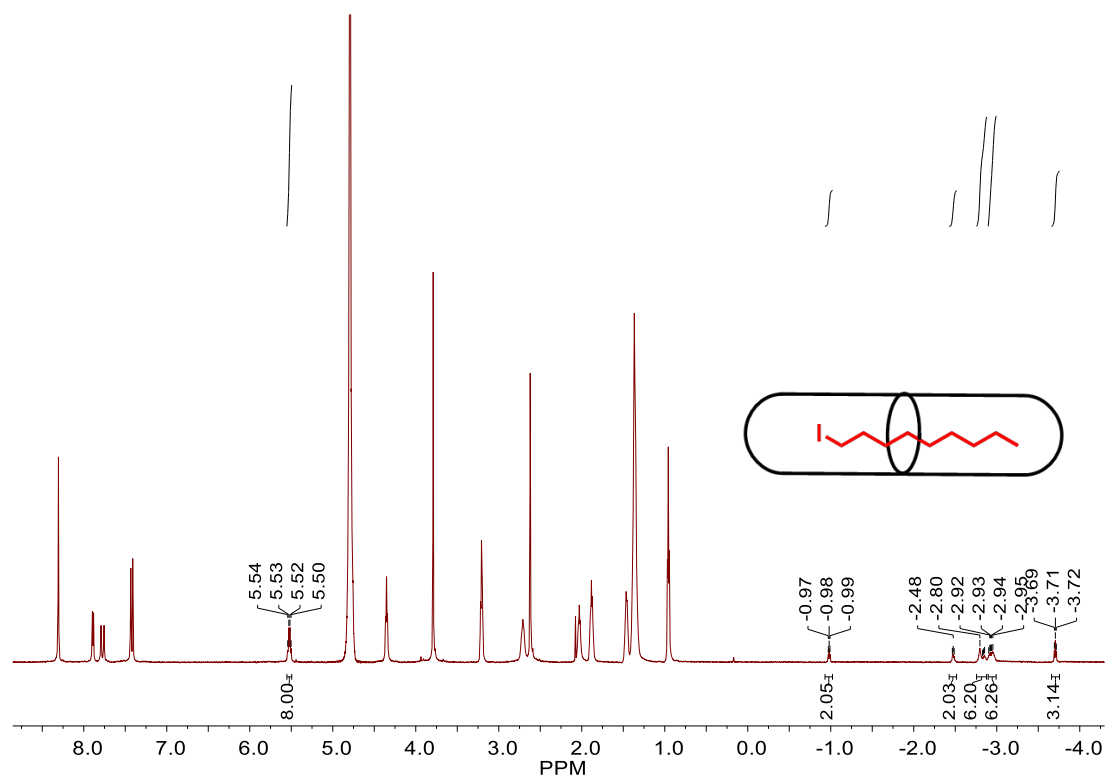

**Fig. 51S**  $^1\text{H}$  NMR spectrum of the complex formed between **1** + 1-iodononane in  $\text{D}_2\text{O}$  (600 MHz, rt)

## References

1. Rahman, F. U.; Tzeli, D.; Petsalakis, I. D.; Theodorakopoulos, G.; Ballester, P.; Rebek, J., Jr.; Yu, Y., Chalcogen Bonding and Hydrophobic Effects Force Molecules into Small Spaces. *J. Am. Chem. Soc.* **2020**, *142* (12), 5876-5883.
